# Supplementary material for: Variation in on-scene time of emergency medical services and the extent of the difference of on-scene time between genders: a retrospective population-based registry study in Riyadh Province, Saudi Arabia
Source: PubMed Central journal article supplement — BMJ Open. 2022 Mar 16;12(3):e052481. doi: 10.1136/bmjopen-2021-052481 (PMC8928325; doi:10.1136/bmjopen-2021-052481), 2022-03-16
Supplement: bmjopen-2021-052481.draft_revisions.pdf [file bmjopen-2021-052481.draft_revisions.pdf]

# BMJ Open

BMJ Open is committed to open peer review. As part of this commitment we make the peer review history of every article we publish publicly available.

When an article is published we post the peer reviewers' comments and the authors' responses online. We also post the versions of the paper that were used during peer review. These are the versions that the peer review comments apply to.

The versions of the paper that follow are the versions that were submitted during the peer review process. They are not the versions of record or the final published versions. They should not be cited or distributed as the published version of this manuscript.

BMJ Open is an open access journal and the full, final, typeset and author-corrected version of record of the manuscript is available on our site with no access controls, subscription charges or pay-per-view fees (<http://bmjopen.bmj.com>).

If you have any questions on BMJ Open's open peer review process please email [info.bmjopen@bmj.com](mailto:info.bmjopen@bmj.com)

# BMJ Open

## Factors that induce gender variation in the on-scene time period of emergency medical services for high urgent transported patients: A retrospective population-based registry study

|                               |                                                                                                                                                                                                                                                                                                                                                                                                                                                                                                                                                                                                                                                                                                                                                                                                                         |
|-------------------------------|-------------------------------------------------------------------------------------------------------------------------------------------------------------------------------------------------------------------------------------------------------------------------------------------------------------------------------------------------------------------------------------------------------------------------------------------------------------------------------------------------------------------------------------------------------------------------------------------------------------------------------------------------------------------------------------------------------------------------------------------------------------------------------------------------------------------------|
| Journal:                      | <i>BMJ Open</i>                                                                                                                                                                                                                                                                                                                                                                                                                                                                                                                                                                                                                                                                                                                                                                                                         |
| Manuscript ID                 | bmjopen-2021-052481                                                                                                                                                                                                                                                                                                                                                                                                                                                                                                                                                                                                                                                                                                                                                                                                     |
| Article Type:                 | Original research                                                                                                                                                                                                                                                                                                                                                                                                                                                                                                                                                                                                                                                                                                                                                                                                       |
| Date Submitted by the Author: | 18-Apr-2021                                                                                                                                                                                                                                                                                                                                                                                                                                                                                                                                                                                                                                                                                                                                                                                                             |
| Complete List of Authors:     | Moafa, H. N.; Maastricht University Faculty of Health Medicine and Life Sciences, Health Services Research, CAPHRI School for Public Health and Primary Care; Jazan University Faculty of Public Health and Tropical Medicine, Health Services Management<br>van Kuijk, Sander; Maastricht Universitair Medisch Centrum+, Clinical Epidemiology and Medical Technology Assessment<br>Moukhyer, M. E. ; Jazan University, Academic Development and Quality, Faculty of Applied Medical Sciences<br>Alqahtani, D. M.; Saudi Arabia Ministry of Health, Electronic Transaction Management, Saudi Red Crescent Authority<br>Haak , Harm; Maxima Medisch Centrum, Eindhoven ; Maastricht University Faculty of Health Medicine and Life Sciences, Health Services Research, CAPHRI School for Public Health and Primary Care |
| Keywords:                     | ACCIDENT & EMERGENCY MEDICINE, HEALTH SERVICES ADMINISTRATION & MANAGEMENT, Health policy < HEALTH SERVICES ADMINISTRATION & MANAGEMENT, PUBLIC HEALTH                                                                                                                                                                                                                                                                                                                                                                                                                                                                                                                                                                                                                                                                  |
|                               |                                                                                                                                                                                                                                                                                                                                                                                                                                                                                                                                                                                                                                                                                                                                                                                                                         |

SCHOLARONE™  
Manuscripts

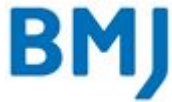

I, the Submitting Author has the right to grant and does grant on behalf of all authors of the Work (as defined in the below author licence), an exclusive licence and/or a non-exclusive licence for contributions from authors who are: i) UK Crown employees; ii) where BMJ has agreed a CC-BY licence shall apply, and/or iii) in accordance with the terms applicable for US Federal Government officers or employees acting as part of their official duties; on a worldwide, perpetual, irrevocable, royalty-free basis to BMJ Publishing Group Ltd ("BMJ") its licensees and where the relevant Journal is co-owned by BMJ to the co-owners of the Journal, to publish the Work in this journal and any other BMJ products and to exploit all rights, as set out in our [licence](#).

The Submitting Author accepts and understands that any supply made under these terms is made by BMJ to the Submitting Author unless you are acting as an employee on behalf of your employer or a postgraduate student of an affiliated institution which is paying any applicable article publishing charge ("APC") for Open Access articles. Where the Submitting Author wishes to make the Work available on an Open Access basis (and intends to pay the relevant APC), the terms of reuse of such Open Access shall be governed by a Creative Commons licence – details of these licences and which [Creative Commons](#) licence will apply to this Work are set out in our licence referred to above.

Other than as permitted in any relevant BMJ Author's Self Archiving Policies, I confirm this Work has not been accepted for publication elsewhere, is not being considered for publication elsewhere and does not duplicate material already published. I confirm all authors consent to publication of this Work and authorise the granting of this licence.

1  
2  
3 **Factors that induce gender variation in the on-scene time period of emergency medical**  
4 **services for high urgent transported patients: A retrospective population-based registry**  
5 **study**  
6  
7

8  
9 H. N. Moafa, MBBS, MPH\*<sup>1,2,3</sup>, S.M.J. van Kuijk, PhD<sup>3</sup>, M. E. Moukhyer MD, PhD<sup>4</sup>, D. M.  
10 Alqahtani, MIT<sup>5</sup>, H.R Haak, MD, PhD<sup>1,6,7</sup>

11  
12 <sup>1</sup>Department of Health Services Research, CAPHRI School for Public Health and Primary  
13 Care, Maastricht University, Maastricht, The Netherlands

14  
15 <sup>2</sup>Department of Health Services Management, Faculty of Public Health and Tropical  
16 Medicine, Jazan University, Jazan, Saudi Arabia

17  
18 <sup>3</sup>Department of Clinical Epidemiology and Medical Technology Assessment, Maastricht  
19 University Medical Centre+, Maastricht, the Netherlands

20  
21 <sup>4</sup>Department of Academic Development and Quality, Faculty of Applied Medical Sciences,  
22 Jazan University, Jazan, Saudi Arabia

23  
24 <sup>5</sup>Department of Electronic Transaction Management, Saudi Red Crescent Authority, Riyadh,  
25 Saudi Arabia

26  
27 <sup>6</sup>Department of Internal Medicine, Maxima Medisch Centre, Eindhoven, The Netherlands

28  
29 <sup>7</sup>Division of General Internal Medicine, Department of Internal Medicine, Maastricht  
30 University Medical Centre+, Maastricht, The Netherlands

31  
32  
33  
34  
35  
36  
37 **\*Corresponding author:** H. N. Moafa.

38  
39 **\*Corresponding author.** Email: h.moafa@maastrichtuniversity.nl & Mobile number:  
40 +31615373733 & Office number: +31433871391 & Home number: +31438552222  
41  
42  
43

44 **Word count:** 3,990  
45  
46  
47  
48  
49  
50  
51  
52  
53  
54  
55  
56  
57  
58  
59  
60

## ABSTRACT

**Objective:** To identify the inter-gender variation of on-scene time (OST) for high urgent emergency cases conveyed by Emergency Medical Services (EMS) in Saudi Arabia and assess other predictors of OST.

**Design:** A retrospective population-based registry study.

**Setting:** Riyadh Province is the largest province in terms of population and the second in terms of geographical area.

**Participants:** all high-urgent transported patients from the scene in urban and rural locations to emergency departments of governmental and private hospitals, be they medical emergencies or trauma-injuries emergencies during 2018.

**Outcome measure:** OST difference between men and women transported by ambulance as a high-urgent emergency

**Results:** In total, 21,878 patients were included for analysis: 33.9% women and 66.1% men. The median OST for women was 22 minutes (interquartile range [IQR] 15 – 30) and 18 minutes (IQR 11 – 26) for men,  $p < 0.001$ ; for medical cases, median OST was 23 minutes (IQR 16 – 31) for women compared to 20 minutes (IQR 13 – 29) for men,  $p < 0.001$ ; for trauma cases, median OST of both sexes was equal. We found the following additional predictors of OST: Factors of emergency type, sex, age category, geographical locations, types of vehicles, and hospital type were all significantly associated with OST in the crude or adjusted analyses. Factors of emergency type, sex, age category, geographical locations, types of vehicles, and hospital type were also significantly associated with the odds of OST of more than 15-minutes in the crude and adjusted regression analyses.

**Conclusion:** The median OST was longer than 15 minutes for more than half of transported cases. For medical cases, women had a longer median OST than men. Additional predictors associated with prolonged OST were the patient's age, location (i.e., urban vs. rural), type of ambulance vehicle, and season.

### Strengths and limitations of this study

- ◆ It is the first study conducted in the Arabian Gulf States that includes vast numbers of high urgent cases.

- ◆ The registry relies on the Saudi red crescent computerized aid dispatching (SRCCAD) system for automated detection of time to compute the timeline.
- ◆ Using registry data has provided us with much statistical power to detect between-group differences and associations for the available characteristics.
- ◆ Registry lacks other important demographic factors related to social status; education, income, and ethnicity, which might be associated with prolonged on-scene time.
- ◆ Time registered in the database depends on the information provided by emergency medical services (EMS) providers through wireless communications with the call centre; hence, any network failure lead produces a missed data.

## INTRODUCTION

Emergency medical services (EMS) in Saudi Arabia have been well developed during the last decade. They provide different levels of emergency care around the clock and is free of charge. Women's lower EMS utilization is one of the challenges found beside the median total EMS time for high urgent emergency cases greater than one hour.<sup>1 2</sup> The on-scene time (OST) duration may take greater than half of the total period of EMS time and made up the largest proportion of total EMS delays.<sup>3 4</sup> Long OST may lead to consequences affecting patient outcomes.<sup>5 6</sup> In certain medical circumstances, patients' transportation to a hospital as soon as possible is highly recommended.<sup>7-10</sup> In the American Heart Association (AHA) guideline for the early management of stroke patients, it is recommended that the OST should not exceed 15 minutes.<sup>7</sup>

The OST duration can result from the crews' decision to collect patient history and medical examination.<sup>11</sup> In addition, the period of OST varies according to the patient's status with or without mortality and geographical locations as urban or rural locations. Sex may also play a factor in OST. For example, a US study found that OST in women complaining of acute chest pain was higher than in men as the crew needed more time for applying electrocardiogram.<sup>12</sup> Other barriers often prolong OST, particularly in trauma cases, when EMS providers' accessibility to patients is difficult. These barriers can be considered inevitable causes such as waiting for police to arrive in an incident resulting from criminal causes or waiting for the fire brigade to extract a patient from a vehicle or a building. It can also be affected in an outdoor address such as the street during a mass gathering after road traffic accidents.<sup>11 13</sup> On the other hand, it can result from patient wishes and family intervention in crews' performance and decision, especially during the patient presence in house locations. Such intervention is significantly affected by culture and education levels and might differ between urban and rural locations.

Factors related to patient culture or demography that influence OST have not been thoroughly studied in the Arabian Gulf States. A recent systematic review found that EMS crews in Saudi Arabia consider a mass gathering factor during road traffic accidents as one of the most frequent barriers affecting their performance to work effectively and timely while patients' families and bystanders come next.<sup>14 15</sup> Furthermore, the median of total EMS time in the Riyadh province of Saudi Arabia for the trauma cases was longer in rural areas than in

1  
2  
3 urban areas, and longer than what was found in other countries such as Denmark and the US.<sup>1</sup>

4  
5 16 17

6 The present study aimed to investigate OST and identify differences between sexes  
7 regarding the amount of time spent at the scene by EMS crews. It also aims to identify other  
8 patient-related factors associated with time spent at the scene for all high urgent emergency  
9 cases that were transported to healthcare facilities in the Riyadh province in Saudi Arabia.  
10  
11  
12  
13

## 14 15 **METHODS**

### 16 17 **Study Design and Setting**

18  
19 This retrospective population-based registry was conducted in the Riyadh province of  
20 Saudi Arabia by using all EMS database records in the Saudi red crescent computer aid  
21 dispatching (SRCCAD) system, from January 1, 2018, to December 31, 2018. Riyadh Province  
22 is located in the central part of Saudi Arabia. It has a geographical size of 404,240 km<sup>2</sup>. It has  
23 an approximate population of 6,792,776 million, according to the last national census. It is  
24 composed of 39 different cities in terms of size and population. Among those cities is Riyadh,  
25 which is the capital and largest city in Saudi Arabia. Besides, there are hundreds of rural  
26 villages dotted between or near these cities.<sup>18</sup> In Saudi Arabia, EMS are free of charge and can  
27 be accessed by calling the call centre, and in certain exceptional conditions, patients can visit  
28 ambulance-grounded centres distributed all over the province, including along highways. EMS  
29 crews of Riyadh province are mainly composed of two Emergency Medical Technicians  
30 (EMT). They are trained on basic life support (BLS) skills to respond to different levels of  
31 emergency cases but do not administer medicine. However, some crews are composed of  
32 physicians and emergency paramedics. These are called mobile intensive care units (MICU),  
33 and respond to certain high critical cases and provide advanced life support (ALS). A third type  
34 of EMS crew consists of senior paramedics and are dispatched in a rapid response non-  
35 transporting vehicle (RRNTV). These often arrive earlier to provide ALS before the essential  
36 transporting ambulances. Time indicators are built-in SRCCAD with 20 minutes for response  
37 time and 15 minutes for OST regardless of urgency level. However, when there are multiple  
38 calls for different emergencies at once, SRCCAD may prioritize cases based on three levels of  
39 urgency and dispatches crews accordingly. Patients or their families who have guardianship  
40 have the right to refuse transportation to hospital after they signed a formal paper of refusal  
41 against medical advices. However, EMS crews can either transport patients to the closest  
42 hospitals or treat them at the scene. The study proposal was reviewed and approved by the  
43 ethical committee in Jazan University with the registry number: REC39/9-S085. The Ethics  
44  
45  
46  
47  
48  
49  
50  
51  
52  
53  
54  
55  
56  
57  
58  
59  
60



1  
2  
3 Committee, based on no need to contact patients, agreed that informed consent was not required  
4 because of the anonymity of the data collected for routine ambulance missions and the study's  
5 retrospective design. The study data take into consideration privacy and confidentiality.  
6  
7  
8  
9

### 10 **Participants and public involvement**

11 Patients and public were not involved in developing the research question, comment on the  
12 database, study design, outcome measures, conduct of the study, or contribute to the writing or  
13 editing of this study.  
14  
15  
16  
17

### 18 **Data collection**

19 The data were obtained through the operations and information department in the  
20 Riyadh branch directorate of Saudi red crescent authority (SRCA). Data were exported from  
21 Microsoft Excel saved in an encrypted file on a hard disc and converted to an IBM SPSS file  
22 (version 25) for further analyses.  
23  
24  
25  
26  
27  
28

### 29 **Selection of Participants**

30 All incoming calls for patients who were triaged at the dispatching centre of SRCCAD  
31 as high urgent cases were included in the current study. Patients of whom age, sex, or location  
32 were missing were excluded, as well as cases categorized by the SRCCAD as cases ended by  
33 non-conveyance.  
34  
35  
36  
37  
38

### 39 **Methods of Measurement**

40 We included all variables related to patient demographics and information related to  
41 dispatching missions from the time interval perspective, starting from calling the call centre  
42 and ending with the patients' arrival to private and governmental hospitals. The EMS time  
43 intervals are composed of 4 different intervals.<sup>19</sup> The first is the response time, which is the  
44 time elapsed starting from receiving a call in the call centre and ended by the ambulance's  
45 crew's arrival to the scene. The second period is the OST, which is the time elapsed, starting  
46 from arrival to the scene and ended by starting to travel back to EMS centre or traveling forward  
47 toward healthcare facilities. The third period is traveling time, which is the time elapsed from  
48 starting to move from the scene until the crew's arrival to healthcare facilities. The fourth and  
49 last period is the hospital stay period, defined as the time elapsed from arrival to the healthcare  
50 facility until handover by emergency room staff. EMS database registry recorded all events  
51 starting from activation time and ending by crew's departure from the hospitals in case the  
52  
53  
54  
55  
56  
57  
58  
59  
60

1  
2  
3 patient had been transported. It measures only response time interval and total EMS time  
4 interval in seconds. Therefore, the total EMS time in this study reflects the four intervals. We  
5 calculated the OST, travel time, hospital time according to standard EMS definition.<sup>19</sup> Those  
6 intervals in Saudi EMS have individual target indicators, such as the response time; 20 minutes;  
7 the OST is 15 minutes while the travel time has no indicators because of EMS providers' and  
8 patient's safety due to driving too fast. Saudi EMS would consider the OST if it exceeded 15  
9 minutes as a prolonged OST. In cases where the call centre dispatched two or more EMS crews,  
10 we selected by calculating the actual time spent with patient from the first crew arrived either  
11 the RRNTV or the main transporting ambulance until the patient was transported by  
12 ambulance.

13  
14  
15 We clustered cases according to urgency level. Missions prioritized as highly urgent by  
16 SRCCAD, and EMS missions dispatched for medical cases, such as acute coronary syndrome,  
17 stroke, and out-of-hospital cardiac arrest, were clustered in one cohort called high urgent  
18 medical emergencies (HUME). Similarly, high urgent trauma emergencies (HUTE) of different  
19 patterns were also clustered. Demographic features available in the registry that were extracted  
20 are sex, age and geographical location. Patients age was categorized into three different age  
21 categories according to Saudi Arabian law; child: patient with an age below 15 years, adult:  
22 patient equal to or over 15 years but younger than 60 years old, and elderly: patient equal to or  
23 more than 60 years of age. Urban locations were defined as an area where metropolitan and  
24 micropolitan cities are located and have a total population of equal or more than 5000  
25 inhabitants. On the other side, areas less than 5000 people or outside urban geographical  
26 locations were considered rural.

27  
28  
29 We included the most considered period during the year study. In Saudi Arabia, the  
30 weekdays are considered from Sunday to Thursday while the Friday and Saturday are the  
31 weekends. Period of the day categorized into two categories; office time, which is the time that  
32 starts from 8:00 AM to 4:00 PM from Sunday to Thursday, while the home time is defined as  
33 the time that starts from 4:01 PM on the same day up to the next day 7:59 AM side by side  
34 with 48 hours of the weekend Friday and Saturday. Working shifts are the two daily intervals  
35 that Saudi EMS schedules to provide emergency services. It is composed of two periods; the  
36 day shift from 8:00 AM to 8:00 PM and the night shift from 8:00 PM to 8:00 AM. We also  
37 included season. The winter season officially starts from Mid-December to Mid-March, then  
38 the spring, which starts from Mid-March until Mid-June. Summer starts from Mid-June to Mid-  
39 December, followed by Autumn, which starts from Mid-September 21 and ends by Mid-  
40 December.<sup>20</sup>

1  
2  
3  
4  
5  
6  
7  
8  
9  
10  
11  
12  
13  
14  
15  
16  
17  
18  
19  
20  
21  
22  
23  
24  
25  
26  
27  
28  
29  
30  
31  
32  
33  
34  
35  
36  
37  
38  
39  
40  
41  
42  
43  
44  
45  
46  
47  
48  
49  
50  
51  
52  
53  
54  
55  
56  
57  
58  
59  
60

Operating vehicle types represented by the three types of crews providing EMS for the clustered emergencies were included. The first, Ambulance type II transporting vehicle (BLS-ambulance) is the vehicle equipped by two EMT, who can perform basic life support and rapid patient transport to hospitals. MICU is another transporting vehicle capable of highly qualified physician-based or paramedics exposed to long-term training equal to or more than four years. The last type of vehicle is RRNTV, which is operated in the last decade to arrive at the scene earlier than the transporting vehicle, and it is also operated by highly experienced EMS providers, often an EMS paramedic. The crew of RRNTV can give ALS and do necessary medical work to prepare the victims to be transported. Hospitals that receive emergency patients are of two types. We also include emergency departments (EDs) based on the two types of hospitals. Governmental hospitals are non-profitable healthcare organizations funded by the Saudi authorities to provide health services for all Saudi citizens. Private hospitals are profitable healthcare organizations operated by non-governmental healthcare firms for healthcare services. Selection of hospital according to SRCA is transporting patient to the nearest hospital, unless closes hospital announce its diversion status.

### Statistical Analysis

The median and interquartile range were computed for response time, OST, travel time, hospital time and total EMS time, and compared between men and women using the Mann-Whitney U Test. The Kruskal-Wallis and Mann-Whitney U Test were conducted to test for differences in OST based on different demographics related to patients' background, stratified by sex. The following factors were considered: age category, geographical location, period of requesting EMS services, season, emergency type (medical or trauma), emergency vehicles dispatched, type of hospital to which the patient was transferred after.

To assess what variables were associated with OST, first simple linear regression was performed to identify the OST difference between different independent predictive variables. After that, multivariable linear regression was used to identify what variables were independently associated with OST.

Furthermore, we conducted logistic regression to assess the association between variables and the odds of an OST of more than 15 minutes based on the SRCCAD indicator. Data were presented as ORs with 95% CIs. We considered  $p < 0.05$  as statistically significant.

## RESULTS

### Characteristics of study subjects

During the study period, 35,944 missions of two types – transporting and non-transporting vehicles – were dispatched to the scene. RRNTV were accounted to 3,397 (9.5%) while the transporting vehicles were 32,547 (90.5%); BLS-Ambulance 25,988 (72.3%), MICU 6,559 (18.2%). Subsequently, 32,547 high emergency patients were transported to Riyadh province hospitals.

Figure 1 presents the flow chart of the transported patients. The study exclusion criteria of records removal show that 443 missions' records were excluded because of gynaecological emergencies, and 8,380 missions' records were removed due to missed data related to sex, age, and geographical locations. Given to lower extreme outliers that were registered the OST as a zero-value due to system errors, 1,898 missions' records were excluded to avoid bias. Therefore, 24,338 missions that represented 21,878 transported patients were initially included. However, 2,460 additional records were excluded because they represented supportive RRNTV's crews who participated as logistic support side by side to BLS-ambulances crew, which were the primary transporting ambulances of the patients. Subsequently, 21,878 missions of highly emergency patients were included in this study. We found that 14,454 (66.1%) of cases were male. In total, 14,454 (66.1%) missions were for HUME, and 7,424 (33.9%) for HUTE. Of all, 66.5% of cases were attended at the scene by BLS-ambulances crews, 22.3% by MICU ambulances crews, and 11.2% by two crews; 50% of them are RRNTV, and the remaining 50% were BLS-ambulances.

## Main results

Table 1 shows time intervals of ambulance service runs, including response time, OST, travel time, and hospital time. The study showed that each duration of OST and travel time for the HUME cohort significantly differed between men and women. The median OST of HUME for women 23 minutes (IQR 16 – 31 minutes) was significantly longer than men 20 minutes (IQR 13 – 29 minutes),  $p < 0.001$ . The median travel time for women 19 minutes (IQR 10 – 29 minutes) was significantly longer than men 18.0 minutes (IQR 10 – 29 minutes),  $p < 0.001$ .

**Table 1** The consecutive time intervals of EMS urgent missions according to the two clustered emergency' cases cohorts for 21,878 transported patients.

| EMS Intervals  | Emergency Type  | Male  |                    | Female |                          |
|----------------|-----------------|-------|--------------------|--------|--------------------------|
|                |                 | No.   | Median (IQR)       | No.    | Median (SD) <sup>†</sup> |
| Response Time  | HUM Emergencies | 8,686 | 17.0 (12.5 – 23.2) | 6,912  | 17.0 (12.6 – 23.1)       |
|                | HUT Emergencies | 5,768 | 15.7 (11.2 – 22.0) | 512    | 15.6 (11.5 – 21.5)       |
| On-Scene time  | HUM Emergencies | 8,686 | 20.0 (13.0 – 29.0) | 6,912  | 23.0 (16.0 – 31.0)*      |
|                | HUT Emergencies | 5,768 | 15.0 (9.0 – 21.0)  | 512    | 15.0 (10.0 – 22.0)       |
| Travel time    | HUM Emergencies | 8,686 | 18.0 (10.0 – 29.0) | 6,912  | 19.0 (11.0 – 31.0)*      |
|                | HUT Emergencies | 5,768 | 19.0 (11.0 – 30.0) | 512    | 18.0 (12.0 – 30.0)       |
| Hospital time  | HUM Emergencies | 8,686 | 17.0 (6.0 – 27.0)  | 6,912  | 16.0 (5.0 – 27.0)        |
|                | HUT Emergencies | 5,768 | 18.0 (6.0 – 28.0)  | 512    | 17.0 (6.0 – 29.0)        |
| Total EMS Time | HUM Emergencies | 8,686 | 79.3 (63.7 – 97.1) | 6,912  | 82.8 (67.0 – 99.8)*      |
|                | HUT Emergencies | 5,768 | 73.8 (58.0 – 92.3) | 512    | 74.7 (60.8 – 91.5)       |

<sup>†</sup>Mann-Whitney U Test

\* Statistically significant difference at  $p$ -value  $< 0.05$

EMS, Emergency Medical Services; HUM, High Urgent Medical; HUT, High Urgent Trauma

Table 2 shows the median and IQR stratified by patients' demographic and background factors for both HUTE and HUME causes. The total median OST was significantly longer for women 22 minutes (IQR 15 – 30 minutes) than men 18 minutes (IQR 11 – 26 minutes),  $p = 0.001$ . Most differences between men and women were significant, all showing longer OST for women. For men, all characteristics besides period of the day, period of the week, and working shift showed a significant difference in OST, for women all besides emergency type.

**Table 2** Median on-scene time difference between sexes for high urgent transported patients (N=21,878).

|                         | Male          |                     | Female       |                      |
|-------------------------|---------------|---------------------|--------------|----------------------|
|                         | No. (%)       | Median (IQR) †      | No. (%)      | Median (IQR) †,‡     |
| <b>Patients (No./N)</b> | 14,454 (66.1) | 18.0 (11.0 – 26.0)  | 7,424 (33.9) | 22.0 (15.0 – 30.0)*  |
| <b>Emergency type</b>   |               |                     |              |                      |
| HUME                    | 8,686 (60.1)  | 20.0 (13.0 – 29.0)* | 6,912 (93.1) | 23.0 (16.0 – 31.0)** |
| HUTE                    | 5,768 (39.9)  | 15.0 (9.0 – 21.0)*  | 512 (6.9)    | 15.0 (10.0 – 22.0)*  |
| <b>Age Category</b>     |               |                     |              |                      |
| Child <15               | 550 (3.8)     | 14.5 (9.0 – 22.0)*  | 267 (3.6)    | 18.0 (11.0 – 25.0)** |
| Adult 15–<60            | 9,803 (67.8)  | 16.0 (10.0 – 24.0)* | 3,299 (44.4) | 21.0 (14.0 – 29.0)** |
| Elderly ≥60             | 4,101 (28.4)  | 22.0 (15.0 – 30.0)* | 3,858 (52.0) | 23.0 (17.0 – 31.0)** |
| <b>Scene location</b>   |               |                     |              |                      |
| Urban                   | 13,562 (93.8) | 18.0 (12.0 – 26.0)* | 7,238 (97.5) | 22.0 (16.0 – 30.0)** |
| Rural                   | 892 (6.2)     | 11.0 (6.0 – 19.0)*  | 186 (2.5)    | 15.0 (9.0 – 21.0)**  |
| <b>Daily hours</b>      |               |                     |              |                      |
| Home time               | 10,901 (75.4) | 18.0 (11.0 – 26.0)  | 5,433 (73.2) | 22.0 (15.0 – 30.0)*  |
| office time             | 3,553 (24.6)  | 18.0 (11.0 – 26.0)  | 1,991 (26.8) | 22.0 (15.0 – 30.0)*  |
| <b>Week days</b>        |               |                     |              |                      |
| Sun-Thursday            | 10,300 (71.3) | 18.0 (11.0 – 26.0)  | 5,333 (71.8) | 22.0 (15.0 – 30.0)*  |
| Weekend                 | 4,152 (28.7)  | 18.0 (11.0 – 26.0)  | 2,091 (28.2) | 22.0 (15.0 – 30.0)*  |
| <b>Working shift</b>    |               |                     |              |                      |
| Day shift               | 6,770 (46.8)  | 18.0 (11.0 – 26.0)  | 3,652 (49.2) | 22.0 (15.0 – 30.0)*  |
| Night shift             | 7,684 (53.2)  | 18.0 (11.0 – 26.0)  | 3,772 (50.8) | 22.0 (15.0 – 30.0)*  |
| <b>Season</b>           |               |                     |              |                      |
| Winter                  | 3,512 (24.3)  | 19.0 (12.0 – 27.0)* | 1,901 (25.6) | 23.0 (16.0 – 31.0)** |
| Spring                  | 3,583 (24.8)  | 18.0 (11.0 – 26.0)* | 1,756 (23.7) | 22.0 (15.0 – 30.0)** |
| Summer                  | 3,573 (24.7)  | 17.0 (11.0 – 25.0)* | 1,771 (23.9) | 22.0 (15.0 – 30.0)** |
| Autumn                  | 3,786 (26.2)  | 18.0 (12.0 – 25.0)* | 1,996 (26.9) | 22.0 (15.0 – 29.0)** |
| <b>Vehicle types</b>    |               |                     |              |                      |
| BLS                     | 9,722 (67.3)  | 17.0 (10.0 – 24.0)* | 4,817 (64.9) | 21.0 (14.0 – 29.0)** |
| MICU                    | 3,204 (22.2)  | 20.0 (13.0 – 28.0)* | 1,675 (22.6) | 24.0 (17.0 – 31.0)** |
| Two crews§              | 1,528 (10.6)  | 22.0 (16.0 – 30.0)* | 932 (12.6)   | 25.0 (19.0 – 33.0)** |
| <b>Receiving EDs</b>    |               |                     |              |                      |
| Governmental            | 14,391¶       |                     | 7,402♦       |                      |
| Private                 | 12,165 (84.2) | 18.0 (11.0 – 26.0)* | 6,271 (84.5) | 22.0 (15.0 – 30.0)** |
|                         | 2,226 (15.4)  | 19.0 (13.0 – 28.0)* | 1,131 (15.2) | 23.0 (17.0 – 31.0)** |

† KRUSKAL\_WALLIS. ‡Mann-Whitney Test. §Missions attended by rapid response non-transporting vehicles and the essential transporting vehicle. ¶63 removed because of undocumented hospital. ♦22 removed because of undocumented hospital. \*Statistically significance at p-value <0.05 between groups. \*Statistically significance at p-value <0.05 within group. \*\*Statistically significance at p-value <0.05 within group and between groups. BLS, Basic Life Support; EDs, Emergency Departments; HUME, High Urgent Medical Emergencies; HUTE, High Urgent Trauma Emergencies; MICU, Mobile Intensive Care Unit.

Table 3 illustrates the association between different variables and OST. Emergency type, sex, age category, geographical locations, types of vehicles, and hospital type were all significantly

associated with OST in the crude, or adjusted analyses. When adjusted for other variables, all besides working hours were retained in the model.

**Table 3** Simple linear and multivariable linear regression of on-scene time according to different predictors (N=21,878).

| Predictors variable              | No. (%)       | Crude Regression Coefficient (95% CI) | Adjusted Regression Coefficient (95% CI) |
|----------------------------------|---------------|---------------------------------------|------------------------------------------|
| <b>Emergency type</b>            |               |                                       |                                          |
| HUME (ref) %(n/N)                | 15,598 (71.3) |                                       |                                          |
| HUTE                             | 6,280 (28.7)  | -6.5 (-6.9 – -6.1)*                   | -4.2 (-4.6 – -3.8)*                      |
| <b>Sex</b>                       |               |                                       |                                          |
| Male (ref) %(n/N)                | 14,454 (66.1) |                                       |                                          |
| Female                           | 7,424 (33.9)  | 3.9 (3.6 – 4.3)*                      | 1.8 (1.5 – 2.2)*                         |
| <b>Age category</b>              |               |                                       |                                          |
| Adult (ref) %(n/N)               | 13,102 (59.9) |                                       |                                          |
| Child (<15)                      | 817 (3.7)     | -1.5 (-2.4 – -0.5)*                   | -2.3 (-3.2 – -1.4)*                      |
| Elderly (≥60)                    | 7,959 (36.4)  | 4.7 (4.3 – 5.1)*                      | 2.1 (1.7 – 2.5)*                         |
| <b>Scene location</b>            |               |                                       |                                          |
| Urban (ref) %(n/N)               | 20,800 (95.1) |                                       |                                          |
| Rural                            | 1,078 (4.9)   | -5.5 (-6.3 – -4.7)*                   | -2.6 (-3.4 – -1.8)*                      |
| <b>Daily hours</b>               |               |                                       |                                          |
| Home time (ref) %(n/N)           | 16,334 (74.7) |                                       |                                          |
| Office time                      | 5,544 (25.3)  | 0.5 (0.15 – 0.95)*                    | 0.4 (-0.1 – 1.0)                         |
| <b>Seven days</b>                |               |                                       |                                          |
| Weekdays (ref) %(n/N)            | 15,633 (71.5) |                                       |                                          |
| Weekend                          | 6,245 (28.5)  | -0.2 (-0.4 – 0.4)                     | 0.2 (-0.2 – 0.6)                         |
| <b>Working shift</b>             |               |                                       |                                          |
| Day shift (ref) %(n/N)           | 10,422 (47.6) |                                       |                                          |
| Night shift                      | 11,456 (52.4) | -0.5 (-0.84 – -0.14)*                 | -0.1 (-0.5 – 0.3)                        |
| <b>Season</b>                    |               |                                       |                                          |
| Summer (ref) %(n/N)              | 5,344 (24.4)  |                                       |                                          |
| Winter                           | 5,413 (24.8)  | 1.4 (0.9 – 1.9)*                      | 0.8 (0.3 – 1.2)*                         |
| Spring                           | 5,339 (24.4)  | 0.3 (-0.2 – 0.8)                      | 0.1 (-0.3 – 0.6)                         |
| Autumn                           | 5,782 (26.4)  | 0.2 (0.3 – 0.6)                       | -0.2 (-0.7 – 0.3)                        |
| <b>Ambulance vehicle</b>         |               |                                       |                                          |
| BLS (ref) %(n/N)                 | 14,539 (66.5) |                                       |                                          |
| MICU                             | 4,879 (22.3)  | 2.8 (2.3 – 3.2)*                      | 2.3 (1.9 – 2.7)*                         |
| Two Crews <sup>†</sup>           | 2,460 (11.2)  | 4.9 (4.4 – 5.5)*                      | 3.7 (3.2 – 4.3)*                         |
| <b>Receiving EDs<sup>‡</sup></b> |               |                                       |                                          |
| Governmental (ref)%(n/N)         | 18,436 (84.6) |                                       |                                          |
| Private                          | 3,357 (15.4)  | 1.6 (1.1 – 2.0)*                      | 0.9 (0.5 – 1.4)*                         |

<sup>†</sup> Missions attended by rapid response non-transporting vehicles and the essential transporting vehicle. <sup>‡</sup> 85 records of undocumented hospitals were removed and not counted. \*Statistically significance at p-value <0.05.

BLS, Basic Life Support; EDs, Emergency Departments; HUME, High Urgent Medical Emergencies; HUTE, High Urgent Trauma Emergencies; MICU, Mobile Intensive Care Unit.

We found that 59.4% of men had an OST of more than 15 minutes compared to 75% for women ( $p < 0.001$ ). Table 4 shows the findings of the crude and adjusted logistic regression models. Emergency type, sex, age category, geographical locations, types of vehicles, and hospitals type were all significantly associated with the odds of OST of more than 15 minutes, both in crude and adjusted models.

**Table 4** Association of predictor variable and on-scene time longer than 15 minutes (N=21,878)

| Predictive variable              | No. (%)       | Crude Odds Ratio (95% CI) | Adjusted Odds Ratio (95% CI) |
|----------------------------------|---------------|---------------------------|------------------------------|
| <b>Emergency type</b>            |               |                           |                              |
| HUME (ref) %(n/N)                | 15,598 (71.3) |                           |                              |
| HUTE                             | 6,280 (28.7)  | 0.3 (0.3 – 0.4)*          | 0.5 (0.47 – 0.55)*           |
| <b>Sex</b>                       |               |                           |                              |
| Male (ref) %(n/N)                | 14,454 (66.1) |                           |                              |
| Female                           | 7,424 (33.9)  | 2.0 (1.9 – 2.2)*          | 1.4 (1.3 – 1.5)*             |
| <b>Age Category</b>              |               |                           |                              |
| Adult (ref) %(n/N)               | 13,102 (59.9) |                           |                              |
| Child (<15)                      | 817 (3.7)     | 0.72 (0.63 – 0.83)*       | 0.61 (0.5 – 0.7)*            |
| Elderly (≥60)                    | 7,959 (36.4)  | 2.5 (2.4 – 2.70)*         | 1.7 (1.6 – 1.8)*             |
| <b>Scene location</b>            |               |                           |                              |
| Urban (ref) %(n/N)               | 20,800 (95.1) |                           |                              |
| Rural                            | 1,078 (4.9)   | 0.3 (0.3 – 0.3)*          | 0.5 (0.4 – 0.6)*             |
| <b>Daily hours</b>               |               |                           |                              |
| Home time (ref) %(n/N)           | 16,334 (74.7) |                           |                              |
| Office time                      | 5,544 (25.3)  | 1.05 (1.0 – 1.1)          | 1.0 (0.9 – 1.1)              |
| <b>Seven days</b>                |               |                           |                              |
| Weekdays (ref) %(n/N)            | 15,633 (71.5) |                           |                              |
| Weekend                          | 6,245 (28.50) | 1.0 (0.9 – 1.0)           | 1.0 (0.9 – 1.0)              |
| <b>Working shift</b>             |               |                           |                              |
| Day shift (ref) %(n/N)           | 10,422 (47.6) |                           |                              |
| Night shift                      | 11,456 (52.4) | 1.0 (0.9 – 1.0)           | 1.0 (0.9 – 1.1)              |
| <b>Season</b>                    |               |                           |                              |
| Summer (ref) % (n/N)             | 5,344 (24.4)  |                           |                              |
| Winter                           | 5,413 (24.8)  | 1.2 (1.1 – 1.3)*          | 1.1 (1.0 – 1.2)*             |
| Spring                           | 5,339 (24.4)  | 1.0 (1.0 – 1.1)           | 1.0 (0.9 – 1.1)              |
| Autumn                           | 5,782 (26.4)  | 1.0 (1.0 – 1.1)           | 1.0 (0.9 – 1.1)              |
| <b>Ambulance vehicle</b>         |               |                           |                              |
| BLS (ref)%(n/N)                  | 14,539 (66.5) |                           |                              |
| MICU                             | 4,879 (22.3)  | 1.7 (1.6 – 1.8)*          | 1.5 (1.4 – 1.7)*             |
| Two Crews <sup>†</sup>           | 2,460 (11.2)  | 2.7 (2.5 – 3.0)*          | 2.2 (2.0 – 2.5)*             |
| <b>Receiving EDs<sup>‡</sup></b> |               |                           |                              |
| Governmental (ref)%(n/N)         | 18,436 (84.6) |                           |                              |
| Private Hospital                 | 3,357 (15.4)  | 1.5 (1.4 – 1.6)*          | 1.3 (1.2 – 1.5)*             |

<sup>†</sup> Missions attended by rapid response non-transporting vehicles and the essential transporting vehicle. <sup>‡</sup> 85 records of undocumented hospitals' EDs were removed and not counted. \*Statistically significance at p-value <0.05. BLS, Basic Life Support; EDs, Emergency Departments; HUME, High Urgent Medical Emergencies; HUTE, High Urgent Trauma Emergencies; MICU, Mobile Intensive Care Unit.



## DISCUSSION

Both OST and total EMS time for HUME were significantly longer for women than men, while missions dispatched to HUT cases did not show a difference. Our study demonstrates that OST was also prolonged when EMS ambulances missions were dispatched for women, elderly, in urban settings, in winter, as advanced EMS services, or for transport to private hospitals.

HUME missions may be more often for clients in house-hold buildings than to HUTE missions that may be dispatched more often to open areas such as streets (e.g., for vehicle accidents). In that case, the profound sex difference in median OST in HUME missions might partly be explained by Saudi house design and culture. It is customary in Saudi Arabia for the upper floors and rooms far from the residential home's main entrance to be a suitable residence for women. Saudi houses' spaces are relatively large due to the high average number of family members. When EMS crews arrive at the scene, they must usually walk a longer distance to reach the female-patient locations. Moreover, covering the female patient and other female family members may take considerable time before the crew are allowed. However, to the best of our knowledge, no previous study has investigated the influence of culture and home designs and whether they have a role in prolonging the OST duration for men or women before. Thus, further research on this topic is warranted.

In Saudi culture, men are usually involved in decision-making related to the transportation of children and elderly of both sexes, and women of all ages. Some Saudi women demand that their primary male relative is present to discuss their health status and plan further action. Some still need guardianship for signing the consent for medical interventions, although they have the right to sign it themselves.<sup>21 22</sup> Hala Aldosari concluded in her recent scientific report that there was a gender-bias against women and a gap in health services accessibility. In specific circumstances, the women's guardian can prohibit them from transportation to the hospital by ambulance.<sup>23</sup> However, also studies in the US showed women had received less

1  
2  
3 EMS interventions and treatment compared to men.<sup>24 25</sup> Further qualitative research may be  
4  
5 needed to identify factors that lead to prolonged OST at households. This study lacks the data  
6  
7 necessary to do so.  
8  
9

10 Although we look for explanations in Saudi culture, gender-differences are not confined  
11  
12 to our study. Studies from other countries often found that women had a longer median or  
13  
14 average OST compared to men.<sup>12 24 26-29</sup> A study conducted by Aguilar et al. in the US found  
15  
16 that women have a more extended OST than men for non-ST-elevation myocardial infarction  
17  
18 and ST-elevation myocardial infarction, despite ECG being implemented for both men and  
19  
20 women.<sup>12</sup> We found the median OST for MICU crews to be significantly longer for women,  
21  
22 and MICU increased the odds of prolonged OST. Schull et al. found dispatching ALS crews  
23  
24 compared to the BLS crew at the scene increase the OST by 5.6 minutes (22.0%).<sup>26</sup> However,  
25  
26 our data did not include the type and number of interventions at the scene.  
27  
28  
29

30 In our study, children represented 3.7% of EMS missions and had significantly shorter  
31  
32 OST. Our study is consistent with multiple studies that found children's OST to be significantly  
33  
34 shorter than adults.<sup>28 30</sup> In our study elderly patients had the by far the longest median OST.  
35  
36 Culture restrictions of face coverage for elderly females reduce with an increase in age. Elderly  
37  
38 people of both sexes in Saudi Arabia most ordinarily live on the first floor due to comorbidities  
39  
40 and difficulties climbing up to the upper floors. In our study, although the median OST for  
41  
42 elderly people was longer than adults and children and given the inter-gender variation in the  
43  
44 OST duration for elderly people, is negligible in comparison to adults and children. The  
45  
46 plausible explanation for prolonged OST for them might be attributed to the difficulty in  
47  
48 communication with them about the severity of their medical conditions and more time  
49  
50 required to stabilize them.<sup>29</sup> A Swedish study found that an increase in age is directly  
51  
52 proportional to an increase in OST.<sup>31</sup> Sullivan et al. found oldest people are significantly  
53  
54  
55  
56  
57  
58  
59  
60

1  
2  
3 associated with longer OST.<sup>27</sup> However, in another study, no association between age and sex  
4 and prolonged OST.<sup>32</sup>  
5  
6

7  
8 More than 50% of emergency cases had an OST of greater than 15 minutes, which is  
9 the Saudi EMS standard time for all crews to perform the standard operational procedures  
10 during OST duration regardless of urgency levels. Although the median OST for HUTE is  
11 closer than HUME to the benchmark of 15-minutes, about 25% of those missions are still more  
12 than 22 minutes. McCoy et al. found OST for trauma cases of greater than 20 minutes was  
13 associated with higher odds of mortality, especially for penetrating trauma and no associations  
14 between increased odds of mortality and out-of-hospital times in blunt trauma victims.<sup>33</sup> A  
15 Dutch study conducted found that for every minute spent on the scene in case of out-of-hospital  
16 cardiac arrest, the odds of 30-day survival decreases.<sup>34</sup> We think 15-minutes may be an  
17 inappropriate standard to deal with all cases equally. There is no consensus between researchers  
18 on how long the crews should stay on the scene for out-of-hospital cardiac arrest, though the  
19 strategic role of scope and run better than stay and play become widespread.<sup>35 36</sup>  
20  
21  
22  
23  
24  
25  
26  
27  
28  
29  
30  
31  
32  
33  
34  
35  
36  
37

### 38 **Strengths and limitations**

39  
40 Our study as retrospective study has several limitations, all pertaining to the EMS  
41 registry. The registry relies on the SRCCAD automated detection of time to compute the  
42 timeline. However, one-fourth of data were missing and we observed impossible outliers that  
43 may have arisen due to network failure during the communication between call centre and  
44 crews at the scene. Our exclusion for those missing data and outliers might have induced  
45 selection bias. Another limitation is the availability of variables that may help the gender-  
46 differences in more details, such as socioeconomic characteristics, time between onset of  
47 symptoms and EMS call, type of treatment at the scene, and OST stratified by its four phases:  
48 arrival at the scene until accessing the patient, patient assessment time, treatment phase, and  
49  
50  
51  
52  
53  
54  
55  
56  
57  
58  
59  
60

1  
2  
3 loading time. On the other hand, using registry data has provided us with much statistical power  
4  
5 to detect between-group differences and associations for the characteristics that were available.  
6  
7  
8  
9

10 Perceived urgency and severity rely on the call centre's triaging system and additional  
11 confirmation by crews during arrival at the scene, which might not reflect the real patient  
12 condition when the patients arrive at the hospital. Therefore, some misclassification in the  
13 urgency types may have occurred. However, our data do reflect daily practices in which  
14 urgency levels are determined as early during the mission as possible. However, with future  
15 involvement in the EMS data set, researchers could explain those reasonable and unavoidable  
16 causes that lead to the lateness.  
17  
18  
19  
20  
21  
22  
23  
24  
25

26 Considering the linking the registry data to outcomes data on patients' receiving  
27 hospital data such as mortality, 28-day survival, and 6-month survival, we showed OST  
28 statistical significance between sexes but limited to show the clinical significance. The last  
29 limitation belongs to the study design of clustering heterogeneous emergency types into two  
30 cohorts and the Saudi benchmarks of 15-minutes. As a result, our study cannot compare our  
31 finding of OST with the essential international guideline like AHA of the recommended OST  
32 for specific emergency cases like out-of-hospital cardiac arrest, acute coronary syndrome, and  
33 stroke. However, our study showed that female time to access definitive care during medical  
34 emergencies is more extended than male. With future involvement in the EMS data set,  
35 researchers could explain the relationship between time performance and EMS outcomes.  
36  
37  
38  
39  
40  
41  
42  
43  
44  
45  
46  
47  
48

49 Finally, our study's generalizability might apply to other urban and rural areas of other  
50 different Saudi provinces and the other Arabian Gulf States having similar EMS systems except  
51 for the Macca city in Saudi Arabia because of Hajj and hundred-thousands of Muslims  
52 gathering during different seasons.  
53  
54  
55  
56  
57  
58  
59  
60

## CONCLUSIONS

This study shows that median OST was longer than 15 minutes for more than half of transported cases. In Addition, it was longer for women for HUME at every time and place, regardless of age category, crew type, and receiving hospital. For those EMS missions that have been dispatched for HUTE, there was no difference. Furthermore, missions to children, in rural areas, for trauma patients, for crews dispatched by MICU-ambulances, in summer as a season, or transported to EDs of governmental hospitals were significant predictors for shorter OST.

**Authors' Contribution:** All authors conceived the study, conceptualize the ideas, supervised the study design and definition of essential terms and study measures. H.N.M, S.M.J.V.K, and DMA performed the data cleaning, management, and analysis. H.N.M was the formal analysis, and S.M.J.V.K provided statistical advice on study design and analysis. H.N.M and DMA had full access to all of the data in the study. H.N.M takes responsibility for the integrity of the data and the accuracy of data analysis. H.N.M, S.M.J.V.K, and H.R.H interpreted the data. H.N.M and H.R.H were the project administrators. H.R.H was the primary supervisor. H.N.M drafted the manuscript, and all authors contributed substantially to its revision. H.N.M takes responsibility for the paper as a whole.

**Conflicts of interest:** no conflicts.

**Funding and support:** None

**Ethics approval:** The Ethics Committee of Jazan University.

Reference:

1. Moafa HN, van Kuijk SMJ, Alqahtani DM, et al. Disparities between Rural and Urban Areas of the Central Region of Saudi Arabia in the Utilization and Time-Centeredness of Emergency Medical Services. *International Journal of Environmental Research and Public Health* 2020;17(21):7944. doi: 10.3390/ijerph17217944

- 1
  - 2
  - 3
  - 4
  - 5
  - 6
  - 7
  - 8
  - 9
  - 10
  - 11
  - 12
  - 13
  - 14
  - 15
  - 16
  - 17
  - 18
  - 19
  - 20
  - 21
  - 22
  - 23
  - 24
  - 25
  - 26
  - 27
  - 28
  - 29
  - 30
  - 31
  - 32
  - 33
  - 34
  - 35
  - 36
  - 37
  - 38
  - 39
  - 40
  - 41
  - 42
  - 43
  - 44
  - 45
  - 46
  - 47
  - 48
  - 49
  - 50
  - 51
  - 52
  - 53
  - 54
  - 55
  - 56
  - 57
  - 58
  - 59
  - 60
2. Moafa HN, Kuijk S, Franssen G, et al. What is known about the quality of out-of-hospital emergency medical services in the Arabian Gulf States? A systematic review. *PLoS one* 2019;14(12):e0226230. doi: 10.1371/journal.pone.0226230
  3. Brown JB, Rosengart MR, Forsythe RM, et al. Not all prehospital time is equal: Influence of scene time on mortality. *The journal of trauma and acute care surgery* 2016;81(1):93-100. doi: 10.1097/TA.0000000000000999
  4. Alrawashdeh A, Nehme Z, Williams B, et al. Emergency medical service delays in ST-elevation myocardial infarction: a meta-analysis. *Heart (British Cardiac Society)* 2020;106(5):365-73. doi: 10.1136/heartjnl-2019-315034
  5. Ruelas OS, Tschautscher CF, Lohse CM, et al. Analysis of Prehospital Scene Times and Interventions on Mortality Outcomes in a National Cohort of Penetrating and Blunt Trauma Patients. *Prehospital Emergency Care* 2018;22(6):691-97. doi: 10.1080/10903127.2018.1448494
  6. Seamon MJ, Fisher CA, Gaughan J, et al. Prehospital procedures before emergency department thoracotomy: "scoop and run" saves lives. *The Journal of trauma* 2007;63(1):113-20. doi: 10.1097/TA.0b013e31806842a1
  7. Jauch EC, Saver JL, Adams HP, et al. Guidelines for the Early Management of Patients With Acute Ischemic Stroke. *Stroke* 2013;44(3):870-947. doi: 10.1161/STR.0b013e318284056a
  8. Campbell BCV, De Silva DA, Macleod MR, et al. Ischaemic stroke. *Nature Reviews Disease Primers* 2019;5(1):70. doi: 10.1038/s41572-019-0118-8
  9. Lockey DJ, Weaver AE, Davies GE. Practical translation of hemorrhage control techniques to the civilian trauma scene. *Transfusion* 2013;53 Suppl 1:17s-22s. doi: 10.1111/trf.12031 [published Online First: 2013/01/18]
  10. Salomone JP, Ustin JS, McSwain NE, Jr., et al. Opinions of trauma practitioners regarding prehospital interventions for critically injured patients. *The Journal of trauma* 2005;58(3):509-15. doi: 10.1097/01.TA.0000152807.63559.2E
  11. Vincent-Lambert C, Mottershaw T. Views of emergency care providers about factors that extend on-scene time intervals. *African journal of emergency medicine* 2018;8(1):1-5. doi: 10.1016/j.afjem.2017.08.003
  12. Aguilar SA, Patel M, Castillo E, et al. Gender differences in scene time, transport time, and total scene to hospital arrival time determined by the use of a prehospital electrocardiogram in patients with complaint of chest pain. *The Journal of emergency medicine* 2012;43(2):291-7. doi: 10.1016/j.jemermed.2011.06.130 [published Online First: 2012/02/14]
  13. Luo W, Yao J, Mitchell R, et al. Spatiotemporal access to emergency medical services in Wuhan, China: accounting for scene and transport time intervals. *International Journal of Health Geographics* 2020;19(1):52. doi: 10.1186/s12942-020-00249-7
  14. Alanazi AF. Emergency medical services in Saudi Arabia: A study on the significance of paramedics and their experiences on barriers as inhibitors of their efficiency. *Int J Appl Basic Med Res* 2012;2(1):34-37. doi: 10.4103/2229-516X.96803
  15. Moafa HN, Kuijk SMJv, Franssen GHLM, et al. What is known about the quality of out-of-hospital emergency medical services in the Arabian Gulf States? A systematic review. *PLOS ONE* 2019;14(12):e0226230. doi: 10.1371/journal.pone.0226230
  16. Mell HK, Mumma SN, Hiestand B, et al. Emergency Medical Services Response Times in Rural, Suburban, and Urban Areas. *JAMA surgery* 2017;152(10):983-84. doi: 10.1001/jamasurg.2017.2230 [published Online First: 2017/07/21]

17. Mills EHA, Aasbjerg K, Hansen SM, et al. Prehospital time and mortality in patients requiring a highest priority emergency medical response: a Danish registry-based cohort study. *BMJ Open* 2019;9(11):e023049. doi: 10.1136/bmjopen-2018-023049
18. The General Authority for Statistics in Saudi Arabia. Saudi arabian census report for 2010 Saudi Arabia: The General Authority for Statistics in Saudi Arabia.; 2021 [194]. Available from: <https://www.stats.gov.sa/en/73> accessed March 15, 2021.
19. Spaite DW, Valenzuela TD, Meislin HW, et al. Prospective validation of a new model for evaluating emergency medical services systems by in-field observation of specific time intervals in prehospital care. *Annals of Emergency Medicine* 1993;22(4):638-45. doi: 10.1016/S0196-0644(05)81840-2
20. Saudi Tourism Authority. The seasons and climate in Saudi Arabia Riyadh, Saudi Arabia: Saudi Tourism Authority; 2021 [Available from: <https://www.visitsaudi.com/en/understand/climate-and-seasons#:~:text=Contrary%20to%20popular%20belief%2C%20it's,overview%20of%20the%20kingdom's%20weather.March15>, 2021.
21. Al-Amoudi S. The Right of Saudi Women to Sign for their Health Care in Saudi Arabia, Fact and Fiction. *LIFE SCIENCE JOURNAL-ACTA ZHENGZHOU UNIVERSITY OVERSEAS EDITION* 2012;9(4):3143-46.
22. Al-Amoudi SM. Health empowerment and health rights in Saudi Arabia. *Saudi Med J* 2017;38(8):785-87. doi: 10.15537/smj.2017.8.19832
23. Aldosari H. The effect of gender norms on women's health in Saudi Arabia: Arab Gulf States Institute in Washington Washington, DC 2017:7.
24. Lewis JF, Zeger SL, Li X, et al. Gender differences in the quality of EMS care nationwide for chest pain and out-of-hospital cardiac arrest. *Women's Health Issues* 2019;29(2):116-24. doi: 10.1016/j.whi.2018.10.007
25. Rothrock SG, Brandt P, Godfrey B, et al. I S T H E R E G E N D E R B I A S I N T H E P R E H O S P I T A L M A N A G E M E N T O F P A T I E N T S W I T H A C U T E C H E S T P A I N ? *Prehospital Emergency Care* 2001;5(4):331-34. doi: 10.1080/10903120190939454
26. Cone DC. Emergency department overcrowding and ambulance transport delays for patients with chest pain. *Annals of Emergency Medicine* 2004;43(3):425-26. doi: 10.1016/j.annemergmed.2003.12.016
27. Sullivan AL, Beshansky JR, Ruthazer R, et al. Factors associated with longer time to treatment for patients with suspected acute coronary syndromes: a cohort study. *Circulation Cardiovascular quality and outcomes* 2014;7(1):86-94. doi: 10.1161/CIRCOUTCOMES.113.000396
28. Ashburn NP, Hendley NW, Angi RM, et al. Prehospital Trauma Scene and Transport Times for Pediatric and Adult Patients. *West J Emerg Med* 2020;21(2):455-62. doi: 10.5811/westjem.2019.11.44597
29. Fok PT, Teubner D, Purdell-Lewis J, et al. Predictors of prehospital on-scene time in an Australian emergency retrieval service. *Prehospital and disaster medicine* 2019;34(3):317-21. doi: 10.1017/S1049023X19004394
30. Wyen H, Lefering R, Maegele M, et al. The golden hour of shock - how time is running out: prehospital time intervals in Germany--a multivariate analysis of 15, 103 patients from the TraumaRegister DGU(R). *Emergency medicine journal : EMJ* 2013;30(12):1048-55. doi: 10.1136/emmermed-2012-201962
31. Hjalmarsson A, Holmberg M, Asp M, et al. Characteristic patterns of emergency ambulance assignments for older adults compared with adults requiring emergency

- 1  
2  
3 care at home in Sweden: a total population study. *BMC Emergency Medicine*  
4 2020;20(1):94. doi: 10.1186/s12873-020-00387-y  
5  
6 32. Nagata I, Abe T, Nakata Y, et al. Factors related to prolonged on-scene time during  
7 ambulance transportation for critical emergency patients in a big city in Japan: a  
8 population-based observational study. *BMJ Open* 2016;6(1):e009599. doi:  
9 10.1136/bmjopen-2015-009599  
10  
11 33. McCoy CE, Menchine M, Sampson S, et al. Emergency medical services out-of-hospital  
12 scene and transport times and their association with mortality in trauma patients  
13 presenting to an urban Level I trauma center. *Annals of emergency medicine*  
14 2013;61(2):167-74. doi: 10.1016/j.annemergmed.2012.08.026  
15  
16 34. de Graaf C, Beesems SG, Koster RW. Time of on-scene resuscitation in out of-hospital  
17 cardiac arrest patients transported without return of spontaneous circulation.  
18 *Resuscitation* 2019;138:235-42. doi: 10.1016/j.resuscitation.2019.03.030  
19  
20 35. Smith RM, Conn AKT. Prehospital care – Scoop and run or stay and play? *Injury*  
21 2009;40:S23-S26. doi: 10.1016/j.injury.2009.10.033  
22  
23 36. Poppe M, Krammel M, Clodi C, et al. Management of EMS on-scene time during  
24 advanced life support in out-of-hospital cardiac arrest: a retrospective observational  
25 trial. *European Heart Journal: Acute Cardiovascular Care* 2020;9(4\_suppl):S82-S89.  
26 doi: 10.1177/2048872620925681  
27  
28  
29  
30  
31  
32  
33  
34  
35  
36  
37  
38  
39  
40  
41  
42  
43  
44  
45  
46  
47  
48  
49  
50  
51  
52  
53  
54  
55  
56  
57  
58  
59  
60



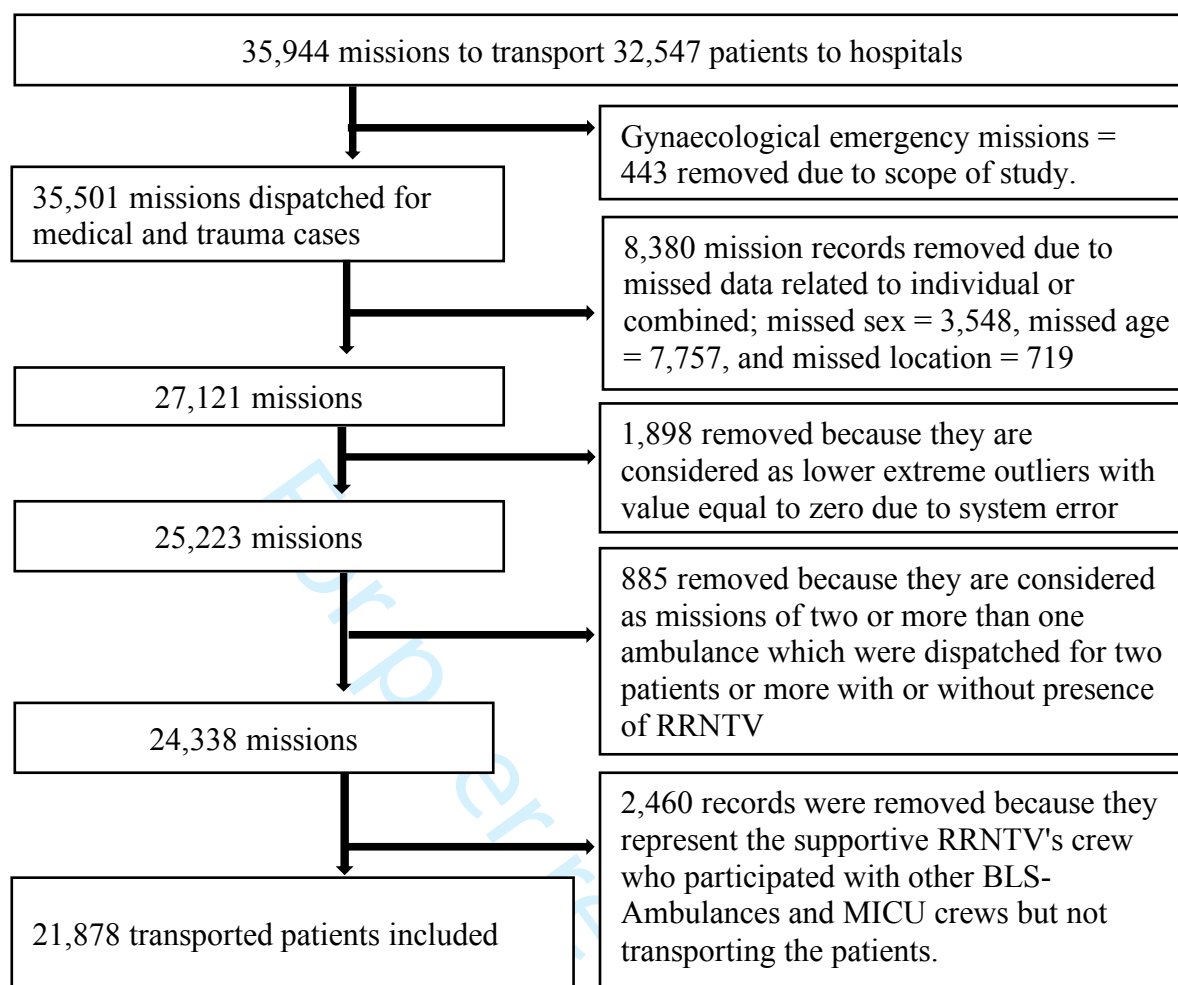

35  
36  
37  
38  
39  
40  
41  
42  
43  
44  
45  
46  
47  
48  
49  
50  
51  
52  
53  
54  
55  
56  
57  
58  
59  
60

Figure 1 Flow chart of included and excluded patients

BLS, Basic Life Support; MICU, Mobile Intensive Care Unit; RRNTV, Rapid Response Non-Transporting Vehicle.

# BMJ Open

## Variation in on-scene time of emergency medical services and the extent of the difference of on-scene time between genders: A retrospective population-based registry study in Riyadh province, Saudi Arabia

|                                 |                                                                                                                                                                                                                                                                                                                                                                                                                                                                                                                                                                                                                                                                                                                                                                                                                           |
|---------------------------------|---------------------------------------------------------------------------------------------------------------------------------------------------------------------------------------------------------------------------------------------------------------------------------------------------------------------------------------------------------------------------------------------------------------------------------------------------------------------------------------------------------------------------------------------------------------------------------------------------------------------------------------------------------------------------------------------------------------------------------------------------------------------------------------------------------------------------|
| Journal:                        | <i>BMJ Open</i>                                                                                                                                                                                                                                                                                                                                                                                                                                                                                                                                                                                                                                                                                                                                                                                                           |
| Manuscript ID                   | bmjopen-2021-052481.R1                                                                                                                                                                                                                                                                                                                                                                                                                                                                                                                                                                                                                                                                                                                                                                                                    |
| Article Type:                   | Original research                                                                                                                                                                                                                                                                                                                                                                                                                                                                                                                                                                                                                                                                                                                                                                                                         |
| Date Submitted by the Author:   | 20-Nov-2021                                                                                                                                                                                                                                                                                                                                                                                                                                                                                                                                                                                                                                                                                                                                                                                                               |
| Complete List of Authors:       | Moafa, H. N.; Jazan University Faculty of Public Health and Tropical Medicine, Health Services Management ; Maastricht University Faculty of Health Medicine and Life Sciences, Health Services Research, CAPHRI School for Public Health and Primary Care<br>van Kuijk, Sander; Maastricht Universitair Medisch Centrum+, Clinical Epidemiology and Medical Technology Assessment<br>Moukhyer, M. E. ; Jazan University, Emergency Medical Services, Faculty of Applied Medical Sciences<br>Alqahtani, D. M.; Saudi Arabia Ministry of Health, Saudi Red Crescent Authority, Department of Innovation and Development<br>Haak , Harm; Maxima Medisch Centrum, Eindhoven ; Maastricht University Faculty of Health Medicine and Life Sciences, Health Services Research, CAPHRI School for Public Health and Primary Care |
| <b>Primary Subject Heading</b>: | Emergency medicine                                                                                                                                                                                                                                                                                                                                                                                                                                                                                                                                                                                                                                                                                                                                                                                                        |
| Secondary Subject Heading:      | Emergency medicine, Health services research                                                                                                                                                                                                                                                                                                                                                                                                                                                                                                                                                                                                                                                                                                                                                                              |
| Keywords:                       | ACCIDENT & EMERGENCY MEDICINE, HEALTH SERVICES ADMINISTRATION & MANAGEMENT, Health policy < HEALTH SERVICES ADMINISTRATION & MANAGEMENT, PUBLIC HEALTH                                                                                                                                                                                                                                                                                                                                                                                                                                                                                                                                                                                                                                                                    |
|                                 |                                                                                                                                                                                                                                                                                                                                                                                                                                                                                                                                                                                                                                                                                                                                                                                                                           |

SCHOLARONE™  
Manuscripts



I, the Submitting Author has the right to grant and does grant on behalf of all authors of the Work (as defined in the below author licence), an exclusive licence and/or a non-exclusive licence for contributions from authors who are: i) UK Crown employees; ii) where BMJ has agreed a CC-BY licence shall apply, and/or iii) in accordance with the terms applicable for US Federal Government officers or employees acting as part of their official duties; on a worldwide, perpetual, irrevocable, royalty-free basis to BMJ Publishing Group Ltd ("BMJ") its licensees and where the relevant Journal is co-owned by BMJ to the co-owners of the Journal, to publish the Work in this journal and any other BMJ products and to exploit all rights, as set out in our [licence](#).

The Submitting Author accepts and understands that any supply made under these terms is made by BMJ to the Submitting Author unless you are acting as an employee on behalf of your employer or a postgraduate student of an affiliated institution which is paying any applicable article publishing charge ("APC") for Open Access articles. Where the Submitting Author wishes to make the Work available on an Open Access basis (and intends to pay the relevant APC), the terms of reuse of such Open Access shall be governed by a Creative Commons licence – details of these licences and which [Creative Commons](#) licence will apply to this Work are set out in our licence referred to above.

Other than as permitted in any relevant BMJ Author's Self Archiving Policies, I confirm this Work has not been accepted for publication elsewhere, is not being considered for publication elsewhere and does not duplicate material already published. I confirm all authors consent to publication of this Work and authorise the granting of this licence.

1  
2  
3 **1 Variation in on-scene time of emergency medical services and the extent of the difference**  
4 **2 of on-scene time between genders: A retrospective population-based registry study in**  
5 **3 Riyadh province, Saudi Arabia**  
6  
7  
8

9 6 H. N. Moafa, MBBS, MPH<sup>\*1,2,3</sup>, S.M.J. van Kuijk, PhD<sup>3</sup>, M. E. Moukhyer MD, PhD<sup>4</sup>, D. M.  
10 7 Alqahtani, MIT<sup>5</sup>, H.R Haak, MD, PhD<sup>2,6,7</sup>

11 8 <sup>1</sup>Department of Health Services Management, Faculty of Public Health and Tropical  
12 9 Medicine, Jazan University, Jazan, Saudi Arabia

13 10 <sup>2</sup>Department of Health Services Research, CAPHRI School for Public Health and Primary  
14 11 Care, Maastricht University, Maastricht, The Netherlands

15 12 <sup>3</sup>Department of Clinical Epidemiology and Medical Technology Assessment, Maastricht  
16 13 University Medical Centre+, Maastricht, the Netherlands

17 14 <sup>4</sup>Department of Emergency Medical Services, Faculty of Applied Medical Sciences, Jazan  
18 15 University, Jazan, Saudi Arabia

19 16 <sup>5</sup>Department of Innovation and Development, Saudi Red Crescent Authority, Riyadh, Saudi  
20 17 Arabia

21 18 <sup>6</sup>Department of Internal Medicine, Maxima Medisch Centre, Eindhoven, The Netherlands

22 19 <sup>7</sup>Division of General Internal Medicine, Department of Internal Medicine, Maastricht  
23 20 University Medical Centre+, Maastricht, The Netherlands

24 21  
25 22 **\*Corresponding author:** H. N. Moafa.

26 23 **\*Corresponding author.** Email: h.moafa@maastrichtuniversity.nl & Mobile number:  
27 24 +31615373733 & Office number: +31433871391 & Home number: +31438552222  
28

29 25  
30 26  
31 27 **Word count:** 4,969  
32  
33  
34  
35  
36  
37  
38  
39  
40

## 41 **ABSTRACT**

42 **Objective:** To identify the inter-gender variation of on-scene time (OST) for highly urgent  
43 emergency cases conveyed by Emergency Medical Services (EMS) in Saudi Arabia and to  
44 assess other predictors of OST.

45 **Design:** A retrospective population-based registry study.

46 **Setting:** Riyadh Province is the largest province in terms of population and the second in terms  
47 of geographical area.

48 **Participants:** all highly urgent transported patients from the scene in urban and rural areas to  
49 emergency departments of governmental and private hospitals, be they medical emergencies  
50 or trauma emergencies during 2018.

51 **Outcome measure:** OST difference between men and women transported by ambulance as  
52 highly urgent emergency cases.

53 **Results:** In total, 21,878 patients were included for analysis: 33.9% women and 66.1% men.  
54 The median OST for women was 22 minutes (interquartile range [IQR] 15 – 30) and 18 minutes  
55 (IQR 11 – 26) for men,  $p < 0.001$ ; for medical cases, median OST was 23 minutes (IQR 16 –  
56 31) for women compared to 20 minutes (IQR 13 – 29) for men,  $p < 0.001$ ; for trauma cases, the  
57 median OST of both sexes was equal. We found the following additional predictors of OST:  
58 factors of emergency type, sex, age category, geographical areas, type of ambulance vehicle,  
59 and hospital type were all significantly associated with OST in the crude or adjusted analyses.  
60 Factors of emergency type, sex, age category, geographical areas, type of ambulance vehicle,  
61 and hospital type were also significantly associated with the odds of OST of more than 15-  
62 minutes in the crude and adjusted regression analyses.

63  
64 **Conclusion:** The median OST was longer than 15 minutes for more than half of transported  
65 cases. For medical cases, women had a longer median OST than men. Additional predictors  
66 associated with prolonged OST were the patient's age, area (i.e., urban vs. rural), type of  
67 ambulance vehicle, and season.

68

### 69 **Strengths and limitations of this study**

- 70 ♦ It is the first study conducted in the Arabian Gulf States that includes a large number  
71 of highly urgent cases.
- 72 ♦ The registry relies on the Saudi Red Crescent Computerized Aid Dispatching  
73 (SRCCAD) system for automated detection of time to compute the timeline.

- 1  
2  
3 74     ♦ Using registry data has provided us with much statistical power to detect between-group  
4           differences and associations for the available characteristics.  
5 75  
6  
7 76     ♦ Registry lacks other important demographic factors related to social status; education,  
8           income, and ethnicity, which might be associated with prolonged on-scene time.  
9 77  
10 78     ♦ Time registered in the database depends on the information provided by emergency  
11           medical services (EMS) providers through wireless communications with the call  
12           centre; hence, any network failure leads to missed data.  
13  
14 80  
15  
16 81  
17 82  
18 83  
19 84  
20 85  
21 86  
22 87  
23 88  
24 89  
25 90  
26 91  
27 92  
28 93  
29 94  
30 95  
31 96  
32 97  
33 98  
34 99  
35 100  
36 101  
37 102  
38 103  
39 104  
40 105  
41 106  
42 107  
43 108  
44 109  
45 110  
46 111  
47 112  
48 113  
49 114  
50 115  
51 116  
52 117  
53 118  
54 119  
55  
56  
57  
58  
59  
60

## 120 INTRODUCTION

121 Emergency medical services (EMS) in Saudi Arabia have been well developed during  
122 the last decade. They provide different levels of emergency care around the clock and free of  
123 charge. Women's lower EMS utilization is one of the challenges found, besides the median  
124 total EMS time for high urgent emergency cases was found to be greater than one hour.<sup>1 2</sup> The  
125 on-scene time (OST) duration may take greater than half of the total period of EMS time and  
126 made up the largest proportion of total EMS delays.<sup>3 4</sup> Long OST may lead to consequences  
127 affecting patient outcomes.<sup>5 6</sup> In certain medical circumstances, patients' transportation to a  
128 hospital as soon as possible is highly recommended.<sup>7-10</sup> In the American Heart Association  
129 (AHA) guideline for the early management of stroke patients, it is recommended that the OST  
130 should not exceed 15 minutes.<sup>7</sup>

131 The OST duration can result from the crews' decision to collect patient history and  
132 medical examination.<sup>11</sup> In addition, the period of OST varies according to the patient's status  
133 with or without mortality and geographical areas as urban or rural locations. Sex may also play  
134 a factor in OST. For example, a US study found that OST in women complaining of acute chest  
135 pain was higher than in men as the crew needed more time to apply electrocardiogram.<sup>12</sup> Other  
136 barriers often prolong OST, particularly in trauma cases, when EMS providers' accessibility to  
137 patients is difficult. These barriers can be considered inevitable causes such as waiting for the  
138 police to arrive in an incident resulting from criminal causes or waiting for the fire brigade to  
139 extract a patient from a vehicle or a building. It can also be affected in an outdoor address such  
140 as the street during a mass gathering after road traffic accidents.<sup>11 13</sup> On the other hand, it can  
141 result from patient wishes and family intervention in crews' performance and decision,  
142 especially when the crew is called to a patient's house. Such intervention is significantly  
143 affected by culture and educational level and might differ between urban and rural areas.

144 Factors related to patient culture or demography that influence OST have not been  
145 thoroughly studied in the Arabian Gulf States. A recent systematic review found that EMS  
146 crews in Saudi Arabia consider mass gathering during road traffic accidents as one of the most  
147 frequent barriers affecting their performance to work effectively and in a timely manner while  
148 the presence of the patients' families or bystanders were cited as the second salient barrier.<sup>2 14</sup>  
149 Furthermore, the median of total EMS time in the Riyadh province of Saudi Arabia for trauma  
150 cases was longer in rural areas than in urban areas, and longer than what was found in other  
151 countries such as Denmark and the US.<sup>1 15 16</sup>

152 The present study aimed to investigate OST and to identify differences between sexes  
153 regarding the amount of time spent at the scene by EMS crews. It also aims to identify other

1  
2  
3 154 patient-related factors associated with time spent at the scene for all highly urgent emergency  
4 155 cases that were transported to healthcare facilities in the Riyadh province in Saudi Arabia.  
5  
6  
7 156

## 8 157 **METHODS**

### 9 158 **Design**

10 159 This retrospective population-based registry was conducted in the Riyadh province of Saudi  
11  
12 160 Arabia by using all EMS database records in the Saudi Red Crescent Computer Aid  
13  
14 161 Dispatching (SRCCAD) system, from January 1, 2018, to December 31, 2018. This study  
15  
16 162 complies with Strengthening the Reporting of Observational Studies in Epidemiology  
17  
18 163 (STROBE).<sup>17</sup>  
19  
20 164

### 21 165 **Setting**

22 166 Riyadh Province is in the central part of Saudi Arabia. It has a geographical size of 404,240  
23  
24 167 km<sup>2</sup>. It has an approximate population of 6,792,776 million, according to the last national  
25  
26 168 census. The province is composed of 39 different cities and Riyadh city is the capital and the  
27  
28 169 largest city in Saudi Arabia. Besides, there are hundreds of rural villages dotted between or  
29  
30 170 near these cities.<sup>18</sup> In Saudi Arabia, EMS are free of charge and can be accessed by calling the  
31  
32 171 call centre, and in certain exceptional conditions, patients can visit ambulance stations  
33  
34 172 distributed all over the province, including along highways. EMS crews of Riyadh province  
35  
36 173 are mainly composed of two Emergency Medical Technicians (EMT). They are trained on  
37  
38 174 basic life support (BLS) skills to respond to different levels of emergency cases but do not  
39  
40 175 administer medicine. However, some crews are composed of physicians and emergency  
41  
42 176 paramedics. These are called mobile intensive care units (MICU) and respond to certain highly  
43  
44 177 critical cases and provide advanced life support (ALS). A third type of EMS crew consists of  
45  
46 178 senior paramedics and are dispatched in a rapid response non-transporting vehicle (RRNTV).  
47  
48 179 These often arrive earlier to provide ALS before the essential transporting ambulances. Time  
49  
50 180 indicators are built-in SRCCAD with 20 minutes for response time and 15 minutes for OST  
51  
52 181 regardless of urgency level.

53 182 Saudi EMS implements a strategy of scope and run, which emanated from the Anglo-  
54  
55 183 American model. Most EMS chain periods are limited with a predefined time to end with the  
56  
57 184 golden hour of total time.<sup>19</sup> The OST comprises three consecutive periods which are access,  
58  
59 185 treatment, and loading time.<sup>20</sup> Access time starts from ambulance vehicles arrival to the scene  
60  
186 up to crew arrival to patients' location. Treatment time is the period of patients' examination  
187 and treatment. Loading time starts from moving patients on the stretcher until the crew starts



1  
2  
3 188 to travel to the hospital. The policy underpinning this 15-minute benchmark for OST is that  
4  
5 189 the Saudi EMS policymakers, based on the number of available crews and the volume of  
6  
7 190 patients' demands, decided that 15 minutes at the scene fit their operational procedures as a  
8  
9 191 policy target. An additional consideration was to avoid delaying ambulance resources from  
10  
11 192 becoming unavailable for new assignments.

12 193 However, when there are multiple calls for different emergencies at once, SRCCAD  
13  
14 194 may prioritize cases based on three levels of urgency and dispatch crews accordingly. Patients  
15  
16 195 or their families who have guardianship have the right to refuse transportation to hospital after  
17  
18 196 they have signed a formal paper of refusal against medical advice. However, EMS crews can  
19  
20 197 either transport patients to the closest hospitals or treat them at the scene. The study proposal  
21  
22 198 was reviewed and approved by the ethical committee in Jazan University with the registry  
23  
24 199 number: REC39/9-S085. The Ethics Committee, based on no need to contact patients, agreed  
25  
26 200 that informed consent was not required because of the anonymity of the data collected for  
27  
28 201 routine ambulance missions and the study's retrospective design. The study data take into  
29  
30 202 consideration privacy and confidentiality.

29 203

### 31 204 **Participants and public involvement**

32 205 Patients and public were not involved in developing the research question, commenting on the  
33  
34 206 database, study design, outcome measures, conduct of the study, or contributing to the writing  
35  
36 207 or editing of this study.

37 208

### 39 209 **Data collection**

41 210 The data were obtained through the operations and information department in the Riyadh  
42  
43 211 branch directorate of Saudi Red Crescent Authority (SRCA). Data were exported from  
44  
45 212 Microsoft Excel saved in an encrypted file on a hard disc and converted to an IBM SPSS file  
46  
47 213 (version 25) for further analyses.

48 214

### 50 215 **Selection of Participants**

51 216 According to the Saudi EMS definition, highly urgent emergency cases are the cases that  
52  
53 217 contacted EMS for support after exposure to serious or life-threatening illness or injuries that  
54  
55 218 require immediate medical intervention and quick transportation to hospital emergency  
56  
57 219 departments (EDs). In this study, all incoming calls for patients who were triaged at the  
58  
59 220 dispatching centre of SRCCAD as highly urgent emergency cases were included.  
60  
221 Gynaecological emergencies were excluded because of the scope of the study to compare both

1  
2  
3 222 sexes. In addition, we excluded records of patients for whom age, sex, or area was missing and  
4  
5 223 cases categorized by the SRCCAD as cases ended by non-conveyance. We considered the  
6  
7 224 potential source of bias; therefore, we excluded the lower extreme outliers with values equal  
8  
9 225 to zero due to system error. Records of missions dispatched for two patients or more in one  
10  
11 226 incident were excluded. Similarly, Missions that involved only Rapid Response Non-  
12  
13 227 Transporting Vehicles (RRNTV) were also removed.  
14

228

### 229 **Methods of Measurement**

15  
16  
17 230 We included all variables related to patient demographics and information related to  
18  
19 231 dispatching missions from the time period perspective, starting from calling the call centre and  
20  
21 232 ending with the patients' arrival to private and governmental hospitals. The EMS time intervals  
22  
23 233 are composed of 4 different periods.<sup>21</sup> First, the response time, which is the time elapsed  
24  
25 234 starting from receiving a call in the call centre and ended by the ambulance's crew's arrival to  
26  
27 235 the scene. Second, the OST, which is the time elapsed, starting from arrival to the scene and  
28  
29 236 ended by starting to travel back to EMS centre or traveling forward toward healthcare facilities.  
30  
31 237 Third, the travel time, which is the time elapsed from starting to move from the scene until the  
32  
33 238 crew's arrival to healthcare facilities. Fourth, is the hospital period, defined as the time elapsed  
34  
35 239 from arrival to the healthcare facility until handover to emergency room staff. EMS database  
36  
37 240 registry recorded all events starting from activation time and ending by crew's departure from  
38  
39 241 the hospitals in the cases where the patient had been transported or when the crew leaves the  
40  
41 242 scene when transportation had been refused. It measures only response time period and total  
42  
43 243 EMS time period in seconds. Therefore, the total EMS time in this study reflects the four  
44  
45 244 periods. We calculated the OST, travel time, hospital time according to standard EMS  
46  
47 245 definition.<sup>21</sup> Those periods in Saudi EMS have individual target indicators, such as the response  
48  
49 246 time; 20 minutes; the OST is 15 minutes, while the travel time has no indicator because of EMS  
50  
51 247 providers' and patients' safety issue arise if the time indicator too strict due to the risk of driving  
52  
53 248 too fast on the way to hospital. Saudi EMS would consider the OST if it exceeded 15 minutes  
54  
55 249 as a prolonged OST. In cases where the call centre dispatched two or more EMS crews, we  
56  
57 250 selected by calculating the actual time spent with the patient from when the first crew arrived  
58  
59 251 either the RRNTV or the main transporting ambulance until the patient was transported by  
60  
252 ambulance.

253 In this study, we focused only on the EMS missions that had been registered by  
254 SRCCAD as highly urgent and ended by transporting patients into hospitals. Therefore, we  
255 clustered emergency cases into two cohorts. The first cohort was the cluster of EMS mission

1  
2  
3 256 that were dispatched for highly urgent medical emergencies (HUME) such as acute coronary  
4  
5 257 syndrome, stroke, and out-of-hospital cardiac arrest. The second cohort was the missions  
6  
7 258 dispatched for highly urgent trauma emergencies (HUTE) such as road traffic accidents.  
8  
9 259 Demographic features available in the registry that were extracted are sex, age and  
10  
11 260 geographical area. Patients' age was divided into three categories according to Saudi Arabian  
12  
13 261 law; child: patient with an age below 15 years old, adult: patient equal to or over 15 years old  
14  
15 262 but younger than 60 years old, and elderly: patient equal to or more than 60 years old. Urban  
16  
17 263 area was defined as an area where metropolitan and micropolitan cities are located and have a  
18  
19 264 total population of equal to or more than 5000 inhabitants. On the other side, areas with less  
20  
21 265 than 5000 people or outside urban geographical area were considered rural.

22 266 We considered the differences in various EMS operational times from the data collected  
23  
24 267 in a one-year time period. In Saudi Arabia, the weekdays are considered from Sunday to  
25  
26 268 Thursday while the Friday and Saturday are the weekends. Period of the day is categorized into  
27  
28 269 two categories; office time, which is the time that starts from 8:00 AM to 4:00 PM from Sunday  
29  
30 270 to Thursday, while the home time is defined as the time that starts from 4:01 PM on the same  
31  
32 271 day up to the next day 7:59 AM side by side with 48 hours of the weekend Friday and Saturday.  
33  
34 272 Working shifts are the two daily periods that Saudi EMS schedules to provide emergency  
35  
36 273 services. It is composed of two periods: the day shift from 8:00 AM to 8:00 PM and the night  
37  
38 274 shift from 8:00 PM to 8:00 AM. We also included season. The winter season officially starts  
39  
40 275 from Mid-December to Mid-March, then the spring, which starts from Mid-March until Mid-  
41  
42 276 June. Summer starts from Mid-June to Mid-December, followed by Autumn, which starts from  
43  
44 277 Mid-September 21 and ends by Mid-December.<sup>22</sup>

45 278 Operating vehicle types represented by the three types of crews providing EMS for the  
46  
47 279 clustered emergencies were included. The first, Ambulance type II transporting vehicle (BLS-  
48  
49 280 ambulance) is the vehicle equipped by two EMT, who can perform basic life support and rapid  
50  
51 281 patient transport to hospitals. MICU is another transporting vehicle capable of highly qualified  
52  
53 282 physician-based or paramedics exposed to long-term training equal to or more than four years.  
54  
55 283 The last type of vehicle is RRNTV, which is operated in the last decade to arrive at the scene  
56  
57 284 earlier than the transporting vehicle, and it is also operated by highly experienced EMS  
58  
59 285 providers, often EMS paramedics. The crew of RRNTV can give ALS and do the necessary  
60  
286 medical work to prepare the patients to be transported. Hospitals that receive emergency  
287 patients are of two types. We also included EDs based on the two types of hospitals.  
288 Governmental hospitals are non-profit healthcare organizations funded by the Saudi authorities

289 to provide health services for all Saudi citizens. Private hospitals are for-profit healthcare  
290 organizations operated by non-governmental healthcare firms for healthcare services.

291

## 292 **Statistical Analysis**

293 The median and interquartile range were computed for response time, OST, travel time,  
294 hospital time and total EMS time, and compared between men and women using the Mann-  
295 Whitney U Test. The Kruskal-Wallis and Mann-Whitney U Test were conducted to test for  
296 differences in OST based on different demographics related to patients, stratified by sex. The  
297 following factors were considered: age category, geographical area, period of requesting EMS  
298 services, season, emergency type (medical or trauma), emergency vehicles, type of hospital to  
299 which the patient was transferred.

300 To assess what variables were associated with OST, first simple linear regression was  
301 performed to identify the OST difference between different independent predictive variables.  
302 After that, multivariable linear regression was used to identify which variables were  
303 independently associated with OST.

304 Furthermore, we conducted logistic regression to assess the association between  
305 variables and the odds of an OST of more than 15 minutes based on the SRCCAD indicator.  
306 Data were presented as ORs with 95% CIs. We considered  $p < 0.05$  as statistically significant.

307

## 308 **RESULTS**

### 309 **Characteristics of study subjects**

310 During the study period, 35,944 missions of two types – transporting and non-transporting  
311 vehicles – were dispatched to the scene. RRNTV accounted for 3,397 (9.5%) missions while  
312 the transporting vehicles were 32,547 (90.5%); BLS-Ambulance 25,988 (72.3%), MICU 6,559  
313 (18.2%). Subsequently, 32,547 high emergency patients were transported to Riyadh province  
314 hospitals.

315 Figure 1 presents the flow chart of the transported patients. The study exclusion criteria  
316 of records removal shows that 443 missions records were excluded because of gynaecological  
317 emergencies, and 8,380 missions' records were removed due to missing data related to sex,  
318 age, and geographical area. Given to lower extreme outliers that were registered the OST as a  
319 zero-value due to system errors, 1,898 missions' records were excluded to avoid bias.  
320 Therefore, 24,338 missions that represented 21,878 transported patients were initially included.  
321 However, 2,460 additional records were excluded because they represented supportive  
322 RRNTV's crews who participated as logistic support side by side to BLS-ambulances crews,

323 which were the primary transporting ambulances of the patients. Subsequently, 21,878  
 324 missions of highly urgent emergency patients were included in this study. We found that 14,454  
 325 (66.1%) of cases were male. In total, 14,454 (66.1%) missions were for HUME, and 7,424  
 326 (33.9%) for HUTE. Of all, 66.5% of cases were attended at the scene by BLS-ambulances  
 327 crews, 22.3% by MICU ambulances crews, and 11.2% by two crews; 50% of them are  
 328 RRNTVs, and the remaining 50% were BLS-ambulances.

329

### 330 Main results

331 Table 1 shows time periods of ambulance service runs, including response time, OST, travel  
 332 time, and hospital time. The study showed that each duration of OST and travel time for the  
 333 HUME cohort significantly differed between men and women. The median OST of HUME for  
 334 women 23 minutes (IQR 16 – 31 minutes) was significantly longer than men 20 minutes (IQR  
 335 13 – 29 minutes),  $p < 0.001$ . The median travel time for women 19 minutes (IQR 10 – 29  
 336 minutes) was significantly longer than men 18 minutes (IQR 10 – 29 minutes),  $p < 0.001$ .

337

**Table 1** The consecutive time periods of EMS urgent missions according to the two clustered emergency cases cohorts for 21,878 transported patients.

| EMS Intervals  | Emergency Type  | Male  |                    | Female |                          |
|----------------|-----------------|-------|--------------------|--------|--------------------------|
|                |                 | No.   | Median (IQR)       | No.    | Median (SD) <sup>†</sup> |
| Response Time  | HUM Emergencies | 8,686 | 17.0 (12.5 – 23.2) | 6,912  | 17.0 (12.6 – 23.1)       |
|                | HUT Emergencies | 5,768 | 15.7 (11.2 – 22.0) | 512    | 15.6 (11.5 – 21.5)       |
| On-Scene time  | HUM Emergencies | 8,686 | 20.0 (13.0 – 29.0) | 6,912  | 23.0 (16.0 – 31.0)*      |
|                | HUT Emergencies | 5,768 | 15.0 (9.0 – 21.0)  | 512    | 15.0 (10.0 – 22.0)       |
| Travel time    | HUM Emergencies | 8,686 | 18.0 (10.0 – 29.0) | 6,912  | 19.0 (11.0 – 31.0)*      |
|                | HUT Emergencies | 5,768 | 19.0 (11.0 – 30.0) | 512    | 18.0 (12.0 – 30.0)       |
| Hospital time  | HUM Emergencies | 8,686 | 17.0 (6.0 – 27.0)  | 6,912  | 16.0 (5.0 – 27.0)        |
|                | HUT Emergencies | 5,768 | 18.0 (6.0 – 28.0)  | 512    | 17.0 (6.0 – 29.0)        |
| Total EMS Time | HUM Emergencies | 8,686 | 79.3 (63.7 – 97.1) | 6,912  | 82.8 (67.0 – 99.8)*      |
|                | HUT Emergencies | 5,768 | 73.8 (58.0 – 92.3) | 512    | 74.7 (60.8 – 91.5)       |

<sup>†</sup>Mann-Whitney U Test

\* Statistically significant difference at p-value <0.05

EMS, Emergency Medical Services; HUM, High Urgent Medical; HUT, High Urgent Trauma

338

1  
2  
3 339 Table 2 shows the median and IQR stratified by patients' demographic and background  
4 factors for both HUTE and HUME causes. The total median OST was significantly longer for  
5 340 women 22 minutes (IQR 15 – 30 minutes) than men 18 minutes (IQR 11 – 26 minutes),  $p =$   
6 341 0.001. Most differences related to OST between men and women were significant, all showing  
7 342 longer OST for women. In addition, all characteristics variables of patients and missions except  
8 343 the daily hours, weekdays, and working shifts were statistically significant among each group  
9 344 of men and women.  
10 345  
11 346  
12 347  
13 348  
14 349  
15 350  
16 351  
17 352  
18 353  
19 354  
20 355  
21 356  
22 357  
23 358  
24 359  
25 360  
26 361  
27 362  
28 363  
29 364  
30 365  
31 366  
32 367  
33 368  
34 369  
35 370  
36 371  
37 372

**Table 2** Median on-scene time difference between sexes for high urgent transported patients (N=21,878).

|                         | Male          |                     | Female       |                      |
|-------------------------|---------------|---------------------|--------------|----------------------|
|                         | No. (%)       | Median (IQR) †      | No. (%)      | Median (IQR) †,‡     |
| <b>Patients (No./N)</b> | 14,454 (66.1) | 18.0 (11.0 – 26.0)  | 7,424 (33.9) | 22.0 (15.0 – 30.0)*  |
| <b>Emergency type</b>   |               |                     |              |                      |
| HUME                    | 8,686 (60.1)  | 20.0 (13.0 – 29.0)* | 6,912 (93.1) | 23.0 (16.0 – 31.0)** |
| HUTE                    | 5,768 (39.9)  | 15.0 (9.0 – 21.0)*  | 512 (6.9)    | 15.0 (10.0 – 22.0)*  |
| <b>Age Category</b>     |               |                     |              |                      |
| Child <15               | 550 (3.8)     | 14.5 (9.0 – 22.0)*  | 267 (3.6)    | 18.0 (11.0 – 25.0)** |
| Adult 15–<60            | 9,803 (67.8)  | 16.0 (10.0 – 24.0)* | 3,299 (44.4) | 21.0 (14.0 – 29.0)** |
| Elderly ≥60             | 4,101 (28.4)  | 22.0 (15.0 – 30.0)* | 3,858 (52.0) | 23.0 (17.0 – 31.0)** |
| <b>Scene location</b>   |               |                     |              |                      |
| Urban                   | 13,562 (93.8) | 18.0 (12.0 – 26.0)* | 7,238 (97.5) | 22.0 (16.0 – 30.0)** |
| Rural                   | 892 (6.2)     | 11.0 (6.0 – 19.0)*  | 186 (2.5)    | 15.0 (9.0 – 21.0)**  |
| <b>Daily hours</b>      |               |                     |              |                      |
| Home time               | 10,901 (75.4) | 18.0 (11.0 – 26.0)  | 5,433 (73.2) | 22.0 (15.0 – 30.0)*  |
| office time             | 3,553 (24.6)  | 18.0 (11.0 – 26.0)  | 1,991 (26.8) | 22.0 (15.0 – 30.0)*  |
| <b>Week days</b>        |               |                     |              |                      |
| Sun-Thursday            | 10,300 (71.3) | 18.0 (11.0 – 26.0)  | 5,333 (71.8) | 22.0 (15.0 – 30.0)*  |
| Weekend                 | 4,152 (28.7)  | 18.0 (11.0 – 26.0)  | 2,091 (28.2) | 22.0 (15.0 – 30.0)*  |
| <b>Working shift</b>    |               |                     |              |                      |
| Day shift               | 6,770 (46.8)  | 18.0 (11.0 – 26.0)  | 3,652 (49.2) | 22.0 (15.0 – 30.0)*  |
| Night shift             | 7,684 (53.2)  | 18.0 (11.0 – 26.0)  | 3,772 (50.8) | 22.0 (15.0 – 30.0)*  |
| <b>Season</b>           |               |                     |              |                      |
| Winter                  | 3,512 (24.3)  | 19.0 (12.0 – 27.0)* | 1,901 (25.6) | 23.0 (16.0 – 31.0)** |
| Spring                  | 3,583 (24.8)  | 18.0 (11.0 – 26.0)* | 1,756 (23.7) | 22.0 (15.0 – 30.0)** |
| Summer                  | 3,573 (24.7)  | 17.0 (11.0 – 25.0)* | 1,771 (23.9) | 22.0 (15.0 – 30.0)** |
| Autumn                  | 3,786 (26.2)  | 18.0 (12.0 – 25.0)* | 1,996 (26.9) | 22.0 (15.0 – 29.0)** |
| <b>Vehicle types</b>    |               |                     |              |                      |
| BLS                     | 9,722 (67.3)  | 17.0 (10.0 – 24.0)* | 4,817 (64.9) | 21.0 (14.0 – 29.0)** |
| MICU                    | 3,204 (22.2)  | 20.0 (13.0 – 28.0)* | 1,675 (22.6) | 24.0 (17.0 – 31.0)** |
| Two crews§              | 1,528 (10.6)  | 22.0 (16.0 – 30.0)* | 932 (12.6)   | 25.0 (19.0 – 33.0)** |
| <b>Receiving EDs</b>    |               |                     |              |                      |
| Governmental            | 14,391¶       |                     | 7,402♦       |                      |
| Private                 | 12,165 (84.2) | 18.0 (11.0 – 26.0)* | 6,271 (84.5) | 22.0 (15.0 – 30.0)** |
|                         | 2,226 (15.4)  | 19.0 (13.0 – 28.0)* | 1,131 (15.2) | 23.0 (17.0 – 31.0)** |

† KRUSKAL\_WALLIS. ‡Mann-Whitney Test. §Missions attended by rapid response non-transporting vehicles and the essential transporting vehicle. ¶63 removed because of undocumented hospital. ♦22 removed because of undocumented hospital. \*Statistically significance at p-value <0.05 between groups. \*\*Statistically significance at p-value <0.05 within group. \*\*\*Statistically significance at p-value <0.05 within group and between groups. BLS, Basic Life Support; EDs, Emergency Departments; HUME, High Urgent Medical Emergencies; HUTE, High Urgent Trauma Emergencies; MICU, Mobile Intensive Care Unit.

373

374

375

376

Table 3 illustrates the association between different variables and OST. Emergency type, sex, age category, geographical areas, types of vehicles, and hospital type were all

377 significantly associated with OST in the crude, or adjusted analyses. When adjusted for other  
 378 variables, all besides working hours were retained in the model.

**Table 3** Simple linear and multivariable linear regression of on-scene time according to different predictors (N=21,878).

| Predictors' variable     | No. (%)       | Crude Regression Coefficient (95% CI) | Adjusted Regression Coefficient (95% CI) |
|--------------------------|---------------|---------------------------------------|------------------------------------------|
| <b>Emergency type</b>    |               |                                       |                                          |
| HUME (ref) %(n/N)        | 15,598 (71.3) |                                       |                                          |
| HUTE                     | 6,280 (28.7)  | -6.5 (-6.9 – -6.1)*                   | -4.2 (-4.6 – -3.8)*                      |
| <b>Sex</b>               |               |                                       |                                          |
| Male (ref) %(n/N)        | 14,454 (66.1) |                                       |                                          |
| Female                   | 7,424 (33.9)  | 3.9 (3.6 – 4.3)*                      | 1.8 (1.5 – 2.2)*                         |
| <b>Age category</b>      |               |                                       |                                          |
| Adult (ref) %(n/N)       | 13,102 (59.9) |                                       |                                          |
| Child (<15)              | 817 (3.7)     | -1.5 (-2.4 – -0.5)*                   | -2.3 (-3.2 – -1.4)*                      |
| Elderly (≥60)            | 7,959 (36.4)  | 4.7 (4.3 – 5.1)*                      | 2.1 (1.7 – 2.5)*                         |
| <b>Scene location</b>    |               |                                       |                                          |
| Urban (ref) %(n/N)       | 20,800 (95.1) |                                       |                                          |
| Rural                    | 1,078 (4.9)   | -5.5 (-6.3 – -4.7)*                   | -2.6 (-3.4 – -1.8)*                      |
| <b>Daily hours</b>       |               |                                       |                                          |
| Home time (ref) %(n/N)   | 16,334 (74.7) |                                       |                                          |
| Office time              | 5,544 (25.3)  | 0.5 (0.15 – 0.95)*                    | 0.4 (-0.1 – 1.0)                         |
| <b>Seven days</b>        |               |                                       |                                          |
| Weekdays (ref) %(n/N)    | 15,633 (71.5) |                                       |                                          |
| Weekend                  | 6,245 (28.5)  | -0.2 (-0.4 – 0.4)                     | 0.2 (-0.2 – 0.6)                         |
| <b>Working shift</b>     |               |                                       |                                          |
| Day shift (ref) %(n/N)   | 10,422 (47.6) |                                       |                                          |
| Night shift              | 11,456 (52.4) | -0.5 (-0.84 – -0.14)*                 | -0.1 (-0.5 – 0.3)                        |
| <b>Season</b>            |               |                                       |                                          |
| Summer (ref) %(n/N)      | 5,344 (24.4)  |                                       |                                          |
| Winter                   | 5,413 (24.8)  | 1.4 (0.9 – 1.9)*                      | 0.8 (0.3 – 1.2)*                         |
| Spring                   | 5,339 (24.4)  | 0.3 (-0.2 – 0.8)                      | 0.1 (-0.3 – 0.6)                         |
| Autumn                   | 5,782 (26.4)  | 0.2 (0.3 – 0.6)                       | -0.2 (-0.7 – 0.3)                        |
| <b>Ambulance vehicle</b> |               |                                       |                                          |
| BLS (ref) %(n/N)         | 14,539 (66.5) |                                       |                                          |
| MICU                     | 4,879 (22.3)  | 2.8 (2.3 – 3.2)*                      | 2.3 (1.9 – 2.7)*                         |
| Two Crews†               | 2,460 (11.2)  | 4.9 (4.4 – 5.5)*                      | 3.7 (3.2 – 4.3)*                         |
| <b>Receiving EDs‡</b>    |               |                                       |                                          |
| Governmental (ref)%(n/N) | 18,436 (84.6) |                                       |                                          |
| Private                  | 3,357 (15.4)  | 1.6 (1.1 – 2.0)*                      | 0.9 (0.5 – 1.4)*                         |

† Missions attended by rapid response non-transporting vehicles and the essential transporting vehicle. ‡ 85 records of undocumented hospitals were removed and not counted. \*Statistically significance at p-value <0.05.

BLS, Basic Life Support; EDs, Emergency Departments; HUME, High Urgent Medical Emergencies; HUTE, High Urgent Trauma Emergencies; MICU, Mobile Intensive Care Unit.

379



380 We found that 59.4% of men had an OST of more than 15 minutes compared to 75%  
 381 for women ( $p < 0.001$ ). Table 4 shows the findings of the crude and adjusted logistic regression  
 382 models. Emergency type, sex, age category, geographical areas, types of vehicles, and hospitals  
 383 type were all significantly associated with the odds of OST of more than 15 minutes, both in  
 384 crude and adjusted models.

**Table 4** Association of predictor variable and on-scene time longer than 15 minutes  
 (N=21,878)

| Predictive variable              | No. (%)       | Crude Odds Ratio (95% CI) | Adjusted Odds Ratio (95% CI) |
|----------------------------------|---------------|---------------------------|------------------------------|
| <b>Emergency type</b>            |               |                           |                              |
| HUME (ref) %(n/N)                | 15,598 (71.3) |                           |                              |
| HUTE                             | 6,280 (28.7)  | 0.3 (0.3 – 0.4)*          | 0.5 (0.47 – 0.55)*           |
| <b>Sex</b>                       |               |                           |                              |
| Male (ref) %(n/N)                | 14,454 (66.1) |                           |                              |
| Female                           | 7,424 (33.9)  | 2.0 (1.9 – 2.2)*          | 1.4 (1.3 – 1.5)*             |
| <b>Age Category</b>              |               |                           |                              |
| Adult (ref) %(n/N)               | 13,102 (59.9) |                           |                              |
| Child (<15)                      | 817 (3.7)     | 0.72 (0.63 – 0.83)*       | 0.61 (0.5 – 0.7)*            |
| Elderly ( $\geq 60$ )            | 7,959 (36.4)  | 2.5 (2.4 – 2.70)*         | 1.7 (1.6 – 1.8)*             |
| <b>Scene location</b>            |               |                           |                              |
| Urban (ref) %(n/N)               | 20,800 (95.1) |                           |                              |
| Rural                            | 1,078 (4.9)   | 0.3 (0.3 – 0.3)*          | 0.5 (0.4 – 0.6)*             |
| <b>Daily hours</b>               |               |                           |                              |
| Home time (ref) %(n/N)           | 16,334 (74.7) |                           |                              |
| Office time                      | 5,544 (25.3)  | 1.05 (1.0 – 1.1)          | 1.0 (0.9 – 1.1)              |
| <b>Seven days</b>                |               |                           |                              |
| Weekdays (ref) %(n/N)            | 15,633 (71.5) |                           |                              |
| Weekend                          | 6,245 (28.50) | 1.0 (0.9 – 1.0)           | 1.0 (0.9 – 1.0)              |
| <b>Working shift</b>             |               |                           |                              |
| Day shift (ref) %(n/N)           | 10,422 (47.6) |                           |                              |
| Night shift                      | 11,456 (52.4) | 1.0 (0.9 – 1.0)           | 1.0 (0.9 – 1.1)              |
| <b>Season</b>                    |               |                           |                              |
| Summer (ref) % (n/N)             | 5,344 (24.4)  |                           |                              |
| Winter                           | 5,413 (24.8)  | 1.2 (1.1 – 1.3)*          | 1.1 (1.0 – 1.2)*             |
| Spring                           | 5,339 (24.4)  | 1.0 (1.0 – 1.1)           | 1.0 (0.9 – 1.1)              |
| Autumn                           | 5,782 (26.4)  | 1.0 (1.0 – 1.1)           | 1.0 (0.9 – 1.1)              |
| <b>Ambulance vehicle</b>         |               |                           |                              |
| BLS (ref)%(n/N)                  | 14,539 (66.5) |                           |                              |
| MICU                             | 4,879 (22.3)  | 1.7 (1.6 – 1.8)*          | 1.5 (1.4 – 1.7)*             |
| Two Crews <sup>†</sup>           | 2,460 (11.2)  | 2.7 (2.5 – 3.0)*          | 2.2 (2.0 – 2.5)*             |
| <b>Receiving EDs<sup>‡</sup></b> |               |                           |                              |
| Governmental (ref)%(n/N)         | 18,436 (84.6) |                           |                              |
| Private Hospital                 | 3,357 (15.4)  | 1.5 (1.4 – 1.6)*          | 1.3 (1.2 – 1.5)*             |

<sup>†</sup> Missions attended by rapid response non-transporting vehicles and the essential transporting vehicle. <sup>‡</sup> 85 records of undocumented hospitals' EDs were removed and not counted. \*Statistically significance at  $p$ -value  $< 0.05$ .

BLS, Basic Life Support; EDs, Emergency Departments; HUME, High Urgent Medical Emergencies; HUTE, High Urgent Trauma Emergencies; MICU, Mobile Intensive Care Unit.

1  
2  
3 3864  
5 387 **DISCUSSION**

6 388 Both OST and total EMS time for HUME were significantly longer for women than men, while  
7  
8  
9 389 missions dispatched to HUTE did not show any difference. Our study demonstrates that OST  
10  
11 390 was also prolonged when EMS ambulances missions were dispatched for women, the elderly,  
12  
13 391 in urban areas, during winter, as advanced EMS services, or for transport to private hospitals.

14  
15 392 HUME missions may be more often for patients in household buildings than to HUTE  
16  
17 393 missions that may be dispatched more often to open areas such as streets (e.g., for vehicle  
18  
19 394 accidents). In that case, the profound sex difference in median OST in HUME missions might  
20  
21 395 partly be explained by Saudi house design and culture. It is customary in Saudi Arabia for the  
22  
23 396 upper floors and rooms far from the residential home's main entrance to be a suitable residence  
24  
25 397 for women. It has been proven that house design has an impact on delaying the access time to  
26  
27 398 the patient after crew arrival to the scene.<sup>23 24</sup> Saudi houses are relatively large due to the high  
28  
29 399 average number of family members. When EMS crews arrive at the scene, they must usually  
30  
31 400 walk a longer distance to reach the female-patient locations. Moreover, cultural differences in  
32  
33 401 Saudi Arabia require women to be fully covered at the presence of non-primary relative male  
34  
35 402 such the EMS all-males crews and that is why it might take a considerable time before the crew  
36  
37 403 are allowed access to the patient.  
38  
39  
40  
41  
42

43 404 Another possible reason for the delay during the scene period for Saudi women is the  
44  
45 405 loading process into ambulance vehicles by all-male crews. This process would require strict  
46  
47 406 adherence by crews' members to use the ambulance stretchers even if the patient can walk  
48  
49 407 independently or with crew members' support. While for Saudi men, the stretcher could be  
50  
51 408 waived once the patient prefers walking without it. However, to the best of our knowledge, no  
52  
53 409 previous study has investigated the influence of culture and home design and whether they  
54  
55 410 have a role in prolonging the OST duration for men or women. Thus, further research on this  
56  
57 411 topic is warranted.  
58  
59  
60

1  
2  
3 412 In Saudi culture, men are usually involved in decision-making related to the  
4  
5 413 transportation of children and elderly of both sexes, and women of all ages. Some Saudi women  
6  
7 414 demand that their primary male relative is present to discuss their health status and plan further  
8  
9 415 action. Some still need guardianship for signing the consent for medical interventions, although  
10  
11 416 they have the right to sign it themselves.<sup>25 26</sup> In specific circumstances, the women's guardian  
12  
13 417 can prohibit them from transportation to the hospital by ambulance.<sup>27</sup> However, studies in the  
14  
15 418 US showed women had received less EMS interventions and treatment compared to men.<sup>28 29</sup>  
16  
17 419 Further qualitative research may be needed to identify factors that lead to prolonged OST at  
18  
19 420 households. This study lacks the data necessary to do so. No previous narrative inquiry has  
20  
21 421 been performed to study this phenomenon in Saudi Arabia. An Australian qualitative study  
22  
23 422 investigated the barriers confronting paramedics because of cultural barriers of middle eastern  
24  
25 423 people living in Australia who might have a cultural resemblance to Saudi people.<sup>30</sup> The  
26  
27 424 informants' paramedics stated that they found difficulties in providing care due to specific  
28  
29 425 norms and behaviour emanating from middle east culture, and time management at the home  
30  
31 426 locations was affected.<sup>30</sup>

32  
33 427 Although we look for explanations in Saudi culture, gender-differences are not confined  
34  
35 428 to our study. Studies from other countries often found that women had a longer median or  
36  
37 429 average OST compared to men.<sup>12 28 31-34</sup> A study conducted by Aguilar et al. in the US found  
38  
39 430 that women have a more extended OST than men for non-ST-elevation myocardial infarction  
40  
41 431 and ST-elevation myocardial infarction, despite ECG being implemented for both men and  
42  
43 432 women.<sup>12</sup> We found the median OST for MICU crews to be significantly longer for women,  
44  
45 433 and MICU increased the odds of prolonged OST. Schull et al. found dispatching ALS crews  
46  
47 434 compared to the BLS crew at the scene increase the OST by 5.6 minutes (22.0%).<sup>31</sup> However,  
48  
49 435 our data did not include the type and number of interventions at the scene.  
50  
51  
52  
53  
54  
55  
56  
57  
58  
59  
60

1  
2  
3 436 During the on-scene period, patients' history and medical examination are performed  
4  
5  
6 437 by EMS providers. In the context of other medical practices like general practice, it has been  
7  
8 438 shown that women tend to take longer consultation time than men.<sup>35</sup> Furthermore, they may  
9  
10 439 express their dissatisfaction with the allowable time as they prefer to linger a bit longer to  
11  
12 440 communicate further with doctors about their problem.<sup>36-38</sup> Even with emergency incidents  
13  
14 441 such as heart attacks, women's behaviour for seeking EMS support has been noted as one of a  
15  
16 442 multitude of predisposing factors for delay response, management, or transport. For example,  
17  
18 443 the self-recognition of onset of symptoms, the delay in contacting EMS or hospitals for help,  
19  
20 444 presenting atypical symptoms to EMS call-takers.<sup>39-42</sup> These behaviours might influence the  
21  
22 445 standard time required to provide the optimum healthcare for them. Moreover, these factors  
23  
24 446 may misguide EMS providers of the importance of quick transport to hospitals EDs. For  
25  
26 447 example, two studies from Australia and Norway have compared women diagnosed with acute  
27  
28 448 myocardial infarction upon arrival to hospitals to men. The studies showed that women were  
29  
30 449 less likely to be transported with sirens and lights.<sup>43 44</sup> A Saudi study found Saudi women had  
31  
32 450 lower health literacy than men.<sup>45</sup> Two other Saudi studies revealed that Saudi women were  
33  
34 451 less likely to use ambulances and more likely to refuse ambulance transportation than men.<sup>1 46</sup>  
35  
36 452 Therefore, this noted long time might be partially explained by their reluctance to be  
37  
38 453 transported and that the ambulance crew spent extra time to convince them.  
39  
40  
41  
42  
43

44 454 In our study, children represented 3.7% of EMS missions and had significantly shorter  
45  
46 455 OST. Our study is consistent with multiple studies that found children's OST to be significantly  
47  
48 456 shorter than adults.<sup>33 47</sup> In our study, elderly patients had by far the longest median OST.  
49  
50 457 Cultural restrictions of face coverage for elderly females reduce with an increase in age. Elderly  
51  
52 458 people of both sexes in Saudi Arabia most ordinarily live on the first floor due to comorbidities  
53  
54 459 and difficulties climbing up to the upper floors. In our study, although the median OST for  
55  
56 460 elderly people was longer than adults and children but the inter-gender variation in the OST  
57  
58  
59  
60

1  
2  
3 461 duration for elderly people is negligible in comparison to adults and children. The plausible  
4  
5 462 explanation for prolonged OST for the elderly might be attributed to the difficulty in  
6  
7 463 communication with them about the severity of their medical conditions and that more time  
8  
9 464 was required to stabilize them.<sup>34</sup> A Swedish study found that an increase in age is directly  
10  
11 465 proportional to an increase in OST.<sup>48</sup> Sullivan et al. found oldest people are significantly  
12  
13 466 associated with longer OST.<sup>32</sup> However, in another study, no association between age and sex  
14  
15 467 and prolonged OST.<sup>49</sup>

16  
17  
18  
19 468 More than 50% of emergency cases had an OST of greater than 15 minutes, which is  
20  
21 469 the Saudi EMS standard time for all crews to perform the standard operational procedures  
22  
23 470 during OST regardless of urgency levels. Although the median OST for HUTE is closer than  
24  
25 471 HUME to the benchmark of 15-minutes, about 25% of those missions are still more than 22  
26  
27 472 minutes. McCoy et al. found that OST for trauma cases of greater than 20 minutes was  
28  
29 473 associated with higher odds of mortality, especially for penetrating trauma and no association  
30  
31 474 between increased odds of mortality and out-of-hospital times in blunt trauma victims.<sup>50</sup> A  
32  
33 475 Dutch study conducted found that for every minute spent on the scene in case of out-of-hospital  
34  
35 476 cardiac arrest, the odds of 30-day survival decreases.<sup>51</sup> We think 15-minutes may be an  
36  
37 477 inappropriate standard to deal with all cases equally. There is no consensus between researchers  
38  
39 478 on how long the crews should stay on the scene for out-of-hospital cardiac arrest, although the  
40  
41 479 strategic role of scope and run versus stay and play is better and has become widespread.<sup>52 53</sup>  
42  
43 480 In the US, Studnek et al. demonstrated that staying less than 15 minutes at the scene was  
44  
45 481 deemed the appropriate time for acute coronary syndrome patients to receive reperfusion  
46  
47 482 therapy in less than 90 minutes from the onset of symptoms.<sup>54</sup> Moreover, several studies  
48  
49 483 demonstrated that OST increases were associated with adverse outcomes.<sup>3 5 50 53 55 56</sup> In  
50  
51 484 addition, the American Stroke Association guideline recommends the OST to be  $\leq 15$  minutes.<sup>7</sup>  
52  
53 485 Although Saudi EMS recognizes the value of time and applies the scope and run by  
54  
55  
56  
57  
58  
59  
60

1  
2  
3 486 encouraging commissioned crews members to be time-efficient within a specified OST, it  
4  
5 487 seems that crews are confronted with difficulties in coping with the standardized time during  
6  
7 488 their time at the scene. Our study revealed EMS crews staying a half-hour or more at the scene  
8  
9 489 for 25 % of adult women regardless of the calls' reasons. We compared this finding with their  
10  
11 490 counterpart of adult men, and we found the difference was at a minimum 5 minutes. A  
12  
13 491 significant delay on the scene can deprive women of receiving important medical intervention,  
14  
15 492 unable to be provided by the ambulance crew, in a timely manner in definitive care especially  
16  
17 493 in life threatening cases. Due to the longer OST for women, they are more exposed to  
18  
19 494 unexpected adverse events such as late or unsafe arrival to hospitals, especially when the crews  
20  
21 495 are committed to not exceeding the golden hour, the benchmark related to the total EMS time,  
22  
23 496 and risk road accidents themselves.  
24  
25  
26  
27  
28  
29

497

### 498 **Strengths and limitations**

30  
31  
32  
33 499 Our study as a retrospective study has several limitations, all pertaining to the EMS registry.  
34  
35 500 The registry relies on the SRCCAD automated detection of time to compute the timeline.  
36  
37 501 However, one-fourth of data were missing, and we observed impossible outliers that may have  
38  
39 502 arisen due to network failure during the communication between call centre and crews at the  
40  
41 503 scene. Our exclusion of those missing data and outliers might have induced selection bias.  
42  
43 504 Another limitation is the non-availability of variables that may explain the gender-differences  
44  
45 505 in more details, such as socioeconomic characteristics, time between onset of symptoms and  
46  
47 506 EMS call, type of treatment at the scene, and OST stratified by its four phases: arrival at the  
48  
49 507 scene until accessing the patient, patient assessment time, treatment phase, and loading time.  
50  
51  
52 508 On the other hand, using registry data has provided us with much statistical power to detect  
53  
54 509 between-group differences and associations for the characteristics that were available.  
55  
56  
57  
58  
59  
60

1  
2  
3 510 Perceived urgency and severity rely on the call centre's triaging system and additional  
4  
5 511 confirmation by crews during arrival at the scene, which might not reflect the real patient  
6  
7 512 condition when the patients arrive at the hospital. Therefore, some misclassification in the  
8  
9 513 urgency types may have occurred. However, our data do reflect daily practices in which  
10  
11 514 urgency levels are determined as early during the mission as possible. However, with future  
12  
13 515 involvement in the EMS data set, researchers could explain those reasonable and unavoidable  
14  
15 516 causes that lead to the lateness.

16  
17  
18  
19 517 Considering the linking of the registry data to outcomes data on patients' receiving  
20  
21 518 hospital data such as mortality, 28-day survival, and 6-month survival, we showed OST  
22  
23 519 statistical significance between sexes but limited to show the clinical significance. The last  
24  
25 520 limitation belongs to the study design of clustering heterogeneous emergency types into two  
26  
27 521 cohorts and the Saudi benchmarks of 15-minutes. As a result, our study cannot compare our  
28  
29 522 finding of OST with the essential international guideline like AHA of the recommended OST  
30  
31 523 for specific emergency cases like out-of-hospital cardiac arrest, acute coronary syndrome, and  
32  
33 524 stroke. However, our study showed that female time to access definitive care during medical  
34  
35 525 emergencies is more extended. With future involvement in the EMS data set, researchers could  
36  
37 526 explain the relationship between time performance and EMS outcomes.

38  
39  
40  
41  
42 527 Finally, our study's generalizability might apply to urban and rural areas of other  
43  
44 528 different Saudi provinces and the other Arabian Gulf States having similar EMS systems except  
45  
46 529 for Macca city in Saudi Arabia because of Hajj and the influx of Muslims gathering during  
47  
48 530 different seasons.

49  
50  
51 531

## 52 532 **CONCLUSIONS**

53  
54  
55 533 This study shows that median OST was longer than 15 minutes for more than half of  
56  
57 534 transported cases. In addition, it was longer for women for HUME at every time and place,  
58  
59  
60

1  
2  
3 535 regardless of age category, crew type, and receiving hospital. For those EMS missions that had  
4  
5 536 been dispatched for HUTE, there was no difference. Furthermore, missions to children, in rural  
6  
7 537 areas, for trauma patients, for crews dispatched by BLS-ambulances, in summer as a season,  
8  
9 538 or transported to EDs of governmental hospitals were all significant predictors for shorter OST.

10  
11  
12 539  
13 540 **Authors' Contribution:** All authors conceived the study, conceptualize the ideas, supervised  
14  
15 541 the study design and definition of essential terms and study measures. H.N.M, S.M.J.V.K, and  
16  
17 542 DMA performed the data cleaning, management, and analysis. H.N.M was the formal analysis,  
18  
19 543 and S.M.J.V.K provided statistical advice on study design and analysis. H.N.M and DMA had  
20  
21 544 full access to all of the data in the study. H.N.M takes responsibility for the integrity of the data  
22  
23 545 and the accuracy of data analysis. H.N.M, S.M.J.V.K, M.E.M, and H.R.H interpreted the data.  
24  
25 546 H.N.M and H.R.H were the project administrators. H.R.H was the primary supervisor. H.N.M  
26  
27 547 drafted the manuscript, and all authors contributed substantially to its revision. H.N.M takes  
28  
29 548 responsibility for the paper as a whole.

29 549

30 550 **Conflicts of interest:** no conflicts.

31 551

32 552 **Funding and support:** None.

33 553

34 554 **Ethics approval:** The Ethics Committee of Jazan University.

35 555

36 556 **Data availability statement:** Data are available upon reasonable request.

37 557

38 558

39 559 Reference:

40 560

- 41 561  
42 562  
43 563  
44 564  
45 565  
46 566  
47 567  
48 568  
49 569  
50 570  
51 571  
52 572  
53 573
1. Moafa HN, van Kuijk SMJ, Alqahtani DM, et al. Disparities between Rural and Urban Areas of the Central Region of Saudi Arabia in the Utilization and Time-Centeredness of Emergency Medical Services. *International Journal of Environmental Research and Public Health* 2020;17(21):7944. doi: 10.3390/ijerph17217944
  2. Moafa HN, Kuijk SMJv, Franssen GHLM, et al. What is known about the quality of out-of-hospital emergency medical services in the Arabian Gulf States? A systematic review. *PLOS ONE* 2019;14(12):e0226230. doi: 10.1371/journal.pone.0226230
  3. Brown JB, Rosengart MR, Forsythe RM, et al. Not all prehospital time is equal: Influence of scene time on mortality. *The journal of trauma and acute care surgery* 2016;81(1):93-100. doi: 10.1097/TA.0000000000000999
  4. Alrawashdeh A, Nehme Z, Williams B, et al. Emergency medical service delays in ST-elevation myocardial infarction: a meta-analysis. *Heart (British Cardiac Society)* 2020;106(5):365-73. doi: 10.1136/heartjnl-2019-315034



- 1  
2  
3 574 5. Ruelas OS, Tschautscher CF, Lohse CM, et al. Analysis of Prehospital Scene Times and  
4 575 Interventions on Mortality Outcomes in a National Cohort of Penetrating and Blunt  
5 576 Trauma Patients. *Prehospital Emergency Care* 2018;22(6):691-97. doi:  
6 577 10.1080/10903127.2018.1448494  
7  
8 578 6. Seamon MJ, Fisher CA, Gaughan J, et al. Prehospital procedures before emergency  
9 579 department thoracotomy: "scoop and run" saves lives. *The Journal of trauma*  
10 580 2007;63(1):113-20. doi: 10.1097/TA.0b013e31806842a1  
11  
12 581 7. Jauch EC, Saver JL, Adams HP, et al. Guidelines for the Early Management of Patients With  
13 582 Acute Ischemic Stroke. *Stroke* 2013;44(3):870-947. doi:  
14 583 doi:10.1161/STR.0b013e318284056a  
15  
16 584 8. Campbell BCV, De Silva DA, Macleod MR, et al. Ischaemic stroke. *Nature Reviews Disease*  
17 585 *Primers* 2019;5(1):70. doi: 10.1038/s41572-019-0118-8  
18  
19 586 9. Lockey DJ, Weaver AE, Davies GE. Practical translation of hemorrhage control techniques  
20 587 to the civilian trauma scene. *Transfusion* 2013;53 Suppl 1:17s-22s. doi:  
21 588 10.1111/trf.12031 [published Online First: 2013/01/18]  
22  
23 589 10. Salomone JP, Ustin JS, McSwain NE, Jr., et al. Opinions of trauma practitioners regarding  
24 590 prehospital interventions for critically injured patients. *The Journal of trauma*  
25 591 2005;58(3):509-15. doi: 10.1097/01.TA.0000152807.63559.2E  
26  
27 592 11. Vincent-Lambert C, Mottershaw T. Views of emergency care providers about factors that  
28 593 extend on-scene time intervals. *African journal of emergency medicine* 2018;8(1):1-  
29 594 5. doi: 10.1016/j.afjem.2017.08.003  
30  
31 595 12. Aguilar SA, Patel M, Castillo E, et al. Gender differences in scene time, transport time,  
32 596 and total scene to hospital arrival time determined by the use of a prehospital  
33 597 electrocardiogram in patients with complaint of chest pain. *The Journal of*  
34 598 *emergency medicine* 2012;43(2):291-7. doi: 10.1016/j.jemermed.2011.06.130  
35 599 [published Online First: 2012/02/14]  
36  
37 600 13. Luo W, Yao J, Mitchell R, et al. Spatiotemporal access to emergency medical services in  
38 601 Wuhan, China: accounting for scene and transport time intervals. *International*  
39 602 *Journal of Health Geographics* 2020;19(1):52. doi: 10.1186/s12942-020-00249-7  
40  
41 603 14. Alanazi AF. Emergency medical services in Saudi Arabia: A study on the significance of  
42 604 paramedics and their experiences on barriers as inhibitors of their efficiency. *Int J*  
43 605 *Appl Basic Med Res* 2012;2(1):34-37. doi: 10.4103/2229-516X.96803  
44  
45 606 15. Mell HK, Mumma SN, Hiestand B, et al. Emergency Medical Services Response Times in  
46 607 Rural, Suburban, and Urban Areas. *JAMA surgery* 2017;152(10):983-84. doi:  
47 608 10.1001/jamasurg.2017.2230 [published Online First: 2017/07/21]  
48  
49 609 16. Mills EHA, Aasbjerg K, Hansen SM, et al. Prehospital time and mortality in patients  
50 610 requiring a highest priority emergency medical response: a Danish registry-based  
51 611 cohort study. *BMJ Open* 2019;9(11):e023049. doi: 10.1136/bmjopen-2018-023049  
52  
53 612 17. von Elm E, Altman DG, Egger M, et al. The Strengthening the Reporting of Observational  
54 613 Studies in Epidemiology (STROBE) statement: guidelines for reporting observational  
55 614 studies. *Journal of clinical epidemiology* 2008;61(4):344-9. doi:  
56 615 10.1016/j.jclinepi.2007.11.008  
57  
58 616 18. The General Authority for Statistics in Saudi Arabia. Saudi arabian census report for 2010  
59 617 Saudi Arabia: The General Authority for Statistics in Saudi Arabia.; 2021 [194].  
60 618 Available from: <https://www.stats.gov.sa/en/73> accessed March 15, 2021.

- 1  
2  
3 619 19. Lerner EB, Moscati RM. The Golden Hour: Scientific Fact or Medical “Urban Legend”?  
4 620 *Academic Emergency Medicine* 2001;8(7):758-60. doi: 10.1111/j.1553-  
5 621 2712.2001.tb00201.x
- 6 622 20. Meislin HW, Conn JB, Conroy C, et al. Emergency medical service agency definitions of  
7 623 response intervals. *Annals of Emergency Medicine* 1999;34(4, Part 1):453-58. doi:  
8 624 10.1016/S0196-0644(99)80046-8
- 9 625 21. Spaite DW, Valenzuela TD, Meislin HW, et al. Prospective validation of a new model for  
10 626 evaluating emergency medical services systems by in-field observation of specific  
11 627 time intervals in prehospital care. *Annals of Emergency Medicine* 1993;22(4):638-45.  
12 628 doi: 10.1016/S0196-0644(05)81840-2
- 13 629 22. Saudi Tourism Authority. The seasons and climate in Saudi Arabia Riyadh, Saudi Arabia:  
14 630 Saudi Tourism Authority; 2021 [Available from:  
15 631 [https://www.visitsaudi.com/en/understand/climate-and-](https://www.visitsaudi.com/en/understand/climate-and-seasons#:~:text=Contrary%20to%20popular%20belief%2C%20it's,overview%20of%20the%20kingdom's%20weather.March15,2021)  
16 632 [seasons#:~:text=Contrary%20to%20popular%20belief%2C%20it's,overview%20of%20the%20kingdom's%20weather.March15,](https://www.visitsaudi.com/en/understand/climate-and-seasons#:~:text=Contrary%20to%20popular%20belief%2C%20it's,overview%20of%20the%20kingdom's%20weather.March15,2021)  
17 633 [2021.](https://www.visitsaudi.com/en/understand/climate-and-seasons#:~:text=Contrary%20to%20popular%20belief%2C%20it's,overview%20of%20the%20kingdom's%20weather.March15,2021)
- 18 634 23. Morrison LJ, Angelini MP, Vermeulen MJ, et al. Measuring the EMS Patient Access Time  
19 635 Interval and the Impact of Responding to High-rise Buildings. *PREHOSPITAL*  
20 636 *EMERGENCY CARE* 2005;9(1):14-18. doi: 10.1080/10903120590891679
- 21 637 24. Drennan IR, Strum RP, Byers A, et al. Out-of-hospital cardiac arrest in high-rise buildings:  
22 638 delays to patient care and effect on survival. *CMAJ : Canadian Medical Association*  
23 639 *Journal* 2016;188(6):413-19. doi: 10.1503/cmaj.150544
- 24 640 25. Al-Amoudi S. The Right of Saudi Women to Sign for their Health Care in Saudi Arabia,  
25 641 Fact and Fiction. *LIFE SCIENCE JOURNAL-ACTA ZHENGZHOU UNIVERSITY OVERSEAS*  
26 642 *EDITION* 2012;9(4):3143-46.
- 27 643 26. Al-Amoudi SM. Health empowerment and health rights in Saudi Arabia. *Saudi Med J*  
28 644 2017;38(8):785-87. doi: 10.15537/smj.2017.8.19832
- 29 645 27. Aldosari H. The effect of gender norms on women's health in Saudi Arabia: Arab Gulf  
30 646 States Institute in Washington Washington, DC 2017:7.
- 31 647 28. Lewis JF, Zeger SL, Li X, et al. Gender differences in the quality of EMS care nationwide  
32 648 for chest pain and out-of-hospital cardiac arrest. *Women's Health Issues*  
33 649 2019;29(2):116-24. doi: 10.1016/j.whi.2018.10.007
- 34 650 29. Rothrock SG, Brandt P, Godfrey B, et al. I S T H E R E G E N D E R B I A S I N T H E P R E H O S P I T A L  
35 651 M A N A G E M E N T O F P A T I E N T S W I T H A C U T E C H E S T P A I N ? *Prehospital Emergency*  
36 652 *Care* 2001;5(4):331-34. doi: 10.1080/10903120190939454
- 37 653 30. Hartley PR. Paramedic practice and the cultural and religious needs of pre-hospital  
38 654 patients in Victoria. Victoria University, 2012.
- 39 655 31. Cone DC. Emergency department overcrowding and ambulance transport delays for  
40 656 patients with chest pain. *Annals of Emergency Medicine* 2004;43(3):425-26. doi:  
41 657 10.1016/j.annemergmed.2003.12.016
- 42 658 32. Sullivan AL, Beshansky JR, Ruthazer R, et al. Factors associated with longer time to  
43 659 treatment for patients with suspected acute coronary syndromes: a cohort study.  
44 660 *Circulation Cardiovascular quality and outcomes* 2014;7(1):86-94. doi:  
45 661 10.1161/CIRCOUTCOMES.113.000396
- 46 662 33. Ashburn NP, Hendley NW, Angi RM, et al. Prehospital Trauma Scene and Transport  
47 663 Times for Pediatric and Adult Patients. *West J Emerg Med* 2020;21(2):455-62. doi:  
48 664 10.5811/westjem.2019.11.44597
- 49  
50  
51  
52  
53  
54  
55  
56  
57  
58  
59  
60

- 1  
2  
3 665 34. Fok PT, Teubner D, Purdell-Lewis J, et al. Predictors of Prehospital On-Scene Time in an  
4 666 Australian Emergency Retrieval Service. *Prehospital and disaster medicine*  
5 667 2019;34(3):317-21. doi: 10.1017/S1049023X19004394  
6  
7 668 35. Deveugele M, Derese A, van den Brink-Muinen A, et al. Consultation length in general  
8 669 practice: cross sectional study in six European countries. *BMJ : British Medical*  
9 670 *Journal* 2002;325(7362):472.  
10  
11 671 36. Hull FM, Hull FS. Time and the general practitioner: the patient's view. *The Journal of the*  
12 672 *Royal College of General Practitioners* 1984;34(259):71-5.  
13 673 37. Surbakti EF, Sari K. The relationship between consultation length and patient  
14 674 satisfaction: A systematic review. *KnE Life Sciences* 2018;41-49-41-49. doi:  
15 675 10.18502/cls.v4i9.3556  
16 676 38. Tai-Seale M, McGuire TG, Zhang W. Time Allocation in Primary Care Office Visits. *Health*  
17 677 *Services Research* 2007;42(5):1871-94. doi: 10.1111/j.1475-6773.2006.00689.x  
18 678 39. Goldberg RJ, Gurwitz JH, Gore JM. Duration of, and Temporal Trends (1994-1997) in,  
19 679 Prehospital Delay in Patients With Acute Myocardial Infarction: The Second National  
20 680 Registry of Myocardial Infarction. *Archives of Internal Medicine* 1999;159(18):2141-  
21 681 47. doi: 10.1001/archinte.159.18.2141  
22 682 40. Waller CG. Understanding prehospital delay behavior in acute myocardial infarction in  
23 683 women. *Critical pathways in cardiology* 2006;5(4):228-34. doi:  
24 684 10.1097/01.hpc.0000249621.40659.cf  
25 685 41. McSweeney JC, Cody M, O'Sullivan P, et al. Women's early warning symptoms of acute  
26 686 myocardial infarction. *ACC Current Journal Review* 2004;13(3):9-9. doi:  
27 687 10.1016/j.accreview.2004.02.001  
28 688 42. Milner KA, Funk M, Richards S, et al. Gender differences in symptom presentation  
29 689 associated with coronary heart disease. *The American journal of cardiology*  
30 690 1999;84(4):396-9. doi: 10.1016/S0002-9149(99)00322-7  
31 691 43. Coventry LL, Bremner AP, Jacobs IG, et al. Myocardial infarction: sex differences in  
32 692 symptoms reported to emergency dispatch. *Prehospital emergency care : official*  
33 693 *journal of the National Association of EMS Physicians and the National Association of*  
34 694 *State EMS Directors* 2013;17(2):193-202. doi: 10.3109/10903127.2012.722175  
35 695 44. Melberg T, Kindervaag B, Rosland J. Gender-specific ambulance priority and delays to  
36 696 primary percutaneous coronary intervention: A consequence of the patients'  
37 697 presentation or the management at the emergency medical communications  
38 698 center? *American Heart Journal* 2013;166(5):839-45. doi: 10.1016/j.ahj.2013.07.034  
39 699 45. Almubark R, Basyouni M, Alghanem A, et al. Health literacy in Saudi Arabia: Implications  
40 700 for public health and healthcare access. *Pharmacology Research & Perspectives*  
41 701 2019;7(4) doi: 10.1002/prp2.514  
42 702 46. Moafa HN, van Kuijk SMJ, Moukhyer ME, et al. Non-Conveyance Due to Patient-Initiated  
43 703 Refusal in Emergency Medical Services: A Retrospective Population-Based Registry  
44 704 Analysis Study in Riyadh Province, Saudi Arabia. *International journal of*  
45 705 *environmental research and public health* 2021;18(17) doi: 10.3390/ijerph18179252  
46 706 47. Wyen H, Lefering R, Maegele M, et al. The golden hour of shock - how time is running  
47 707 out: prehospital time intervals in Germany--a multivariate analysis of 15, 103  
48 708 patients from the TraumaRegister DGU(R). *Emergency medicine journal : EMJ*  
49 709 2013;30(12):1048-55. doi: 10.1136/emmermed-2012-201962  
50 710 48. Hjalmarsson A, Holmberg M, Asp M, et al. Characteristic patterns of emergency  
51 711 ambulance assignments for older adults compared with adults requiring emergency

- 1  
2  
3 712 care at home in Sweden: a total population study. *BMC Emergency Medicine*  
4 713 2020;20(1):94. doi: 10.1186/s12873-020-00387-y  
5  
6 714 49. Nagata I, Abe T, Nakata Y, et al. Factors related to prolonged on-scene time during  
7 715 ambulance transportation for critical emergency patients in a big city in Japan: a  
8 716 population-based observational study. *BMJ Open* 2016;6(1):e009599. doi:  
9 717 10.1136/bmjopen-2015-009599  
10  
11 718 50. McCoy CE, Menchine M, Sampson S, et al. Emergency medical services out-of-hospital  
12 719 scene and transport times and their association with mortality in trauma patients  
13 720 presenting to an urban Level I trauma center. *Annals of emergency medicine*  
14 721 2013;61(2):167-74. doi: 10.1016/j.annemergmed.2012.08.026  
15  
16 722 51. de Graaf C, Beesems SG, Koster RW. Time of on-scene resuscitation in out of-hospital  
17 723 cardiac arrest patients transported without return of spontaneous circulation.  
18 724 *Resuscitation* 2019;138:235-42. doi: 10.1016/j.resuscitation.2019.03.030  
19  
20 725 52. Smith RM, Conn AKT. Prehospital care – Scoop and run or stay and play? *Injury*  
21 726 2009;40:S23-S26. doi: 10.1016/j.injury.2009.10.033  
22  
23 727 53. Poppe M, Krammel M, Clodi C, et al. Management of EMS on-scene time during  
24 728 advanced life support in out-of-hospital cardiac arrest: a retrospective observational  
25 729 trial. *European Heart Journal: Acute Cardiovascular Care* 2020;9(4\_suppl):S82-S89.  
26 730 doi: 10.1177/2048872620925681  
27  
28 731 54. Studnek JR, Garvey L, Blackwell T, et al. Association between prehospital time intervals  
29 732 and ST-elevation myocardial infarction system performance. *Circulation*  
30 733 2010;122(15):1464-9. doi: 10.1161/CIRCULATIONAHA.109.931154  
31  
32 734 55. Johnson NJ, Carr BG, Salhi R, et al. Characteristics and outcomes of injured patients  
33 735 presenting by private vehicle in a state trauma system. *The American journal of*  
34 736 *emergency medicine* 2013;31(2):275-81. doi: 10.1016/j.ajem.2012.07.023  
35  
36 737 56. Hang AP, Ki Ok A, Eui Jung L, et al. Association between Survival and Time of On-Scene  
37 738 Resuscitation in Refractory Out-of-Hospital Cardiac Arrest: A Cross-Sectional  
38 739 Retrospective Study. *International Journal of Environmental Research and Public*  
39 740 *Health*; 18(496).  
40 741

40 742 Figure 1 Flow chart of included and excluded patients.

41 743 BLS, Basic Life Support; MICU, Mobile Intensive Care Unit; RRNTV, Rapid Response Non-Transporting Vehicle.  
42 744

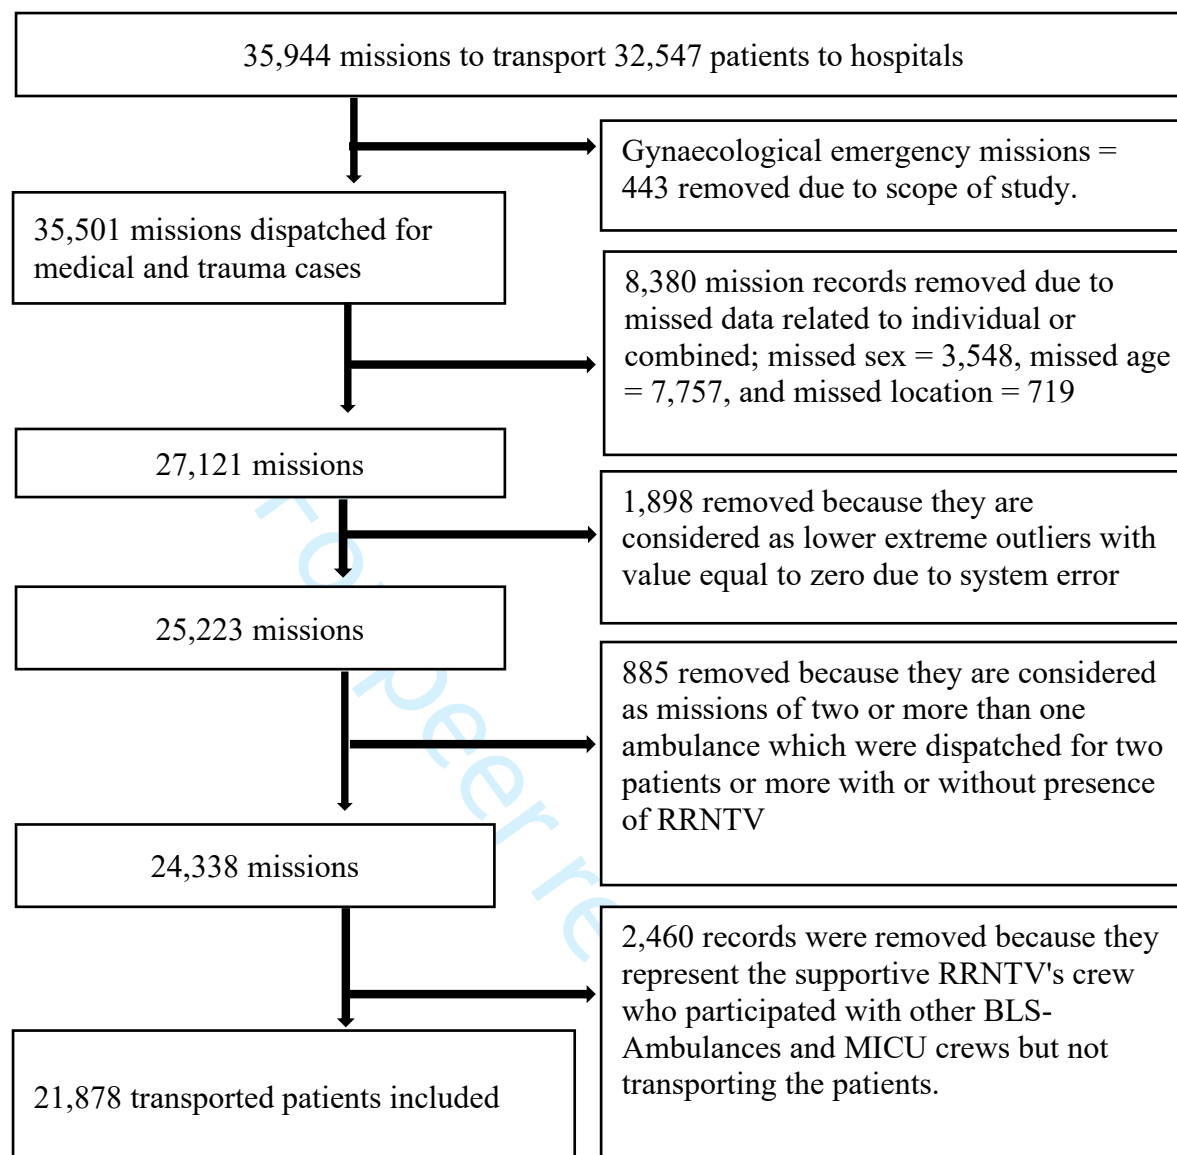

## STROBE Statement—checklist of items that should be included in reports of observational studies

|                              | Item No. | Recommendation                                                                                                                                                                             | Page No. | Relevant text from manuscript |
|------------------------------|----------|--------------------------------------------------------------------------------------------------------------------------------------------------------------------------------------------|----------|-------------------------------|
| <b>Title and abstract</b>    | 1        | (a) Indicate the study's design with a commonly used term in the title or the abstract                                                                                                     | 2        | Line 45                       |
|                              |          | (b) Provide in the abstract an informative and balanced summary of what was done and what was found                                                                                        | 2        | Lines 45 – 62                 |
| <b>Introduction</b>          |          |                                                                                                                                                                                            |          |                               |
| Background/rationale         | 2        | Explain the scientific background and rationale for the investigation being reported                                                                                                       | 4        | Lines 121 – 151               |
| Objectives                   | 3        | State specific objectives, including any prespecified hypotheses                                                                                                                           | 4 – 5    | Lines 152 – 155               |
| <b>Methods</b>               |          |                                                                                                                                                                                            |          |                               |
| Study design                 | 4        | Present key elements of study design early in the paper                                                                                                                                    | 5        | Lines 159 – 163               |
| Setting                      | 5        | Describe the setting, locations, and relevant dates, including periods of recruitment, exposure, follow-up, and data collection                                                            | 5 – 6    | Lines 166 – 202               |
| Participants                 | 6        | (a) <i>Cohort study</i> —Give the eligibility criteria, and the sources and methods of selection of participants. Describe methods of follow-up                                            | 6 – 7    | Lines 216 – 227               |
|                              |          | <i>Case-control study</i> —Give the eligibility criteria, and the sources and methods of case ascertainment and control selection. Give the rationale for the choice of cases and controls |          |                               |
|                              |          | <i>Cross-sectional study</i> —Give the eligibility criteria, and the sources and methods of selection of participants                                                                      |          |                               |
|                              |          | (b) <i>Cohort study</i> —For matched studies, give matching criteria and number of exposed and unexposed                                                                                   |          |                               |
|                              |          | <i>Case-control study</i> —For matched studies, give matching criteria and the number of controls per case                                                                                 |          |                               |
| Variables                    | 7        | Clearly define all outcomes, exposures, predictors, potential confounders, and effect modifiers. Give diagnostic criteria, if applicable                                                   | 7 – 9    | Lines 230 – 290               |
| Data sources/<br>measurement | 8*       | For each variable of interest, give sources of data and details of methods of assessment (measurement). Describe comparability of assessment methods if there is more than one group       | 7 – 9    | Lines 230 – 306               |
| Bias                         | 9        | Describe any efforts to address potential sources of bias                                                                                                                                  | 7        | Lines 223 – 227               |
| Study size                   | 10       | Explain how the study size was arrived at                                                                                                                                                  | 6 – 7    | Lines 216 – 227               |

Continued on next page

|                        |     |                                                                                                                                                                                                              |         |                 |
|------------------------|-----|--------------------------------------------------------------------------------------------------------------------------------------------------------------------------------------------------------------|---------|-----------------|
| Quantitative variables | 11  | Explain how quantitative variables were handled in the analyses. If applicable, describe which groupings were chosen and why                                                                                 | 7 – 9   | Lines 230 – 290 |
| Statistical methods    | 12  | (a) Describe all statistical methods, including those used to control for confounding                                                                                                                        | 9       | Lines 293 – 306 |
|                        |     | (b) Describe any methods used to examine subgroups and interactions                                                                                                                                          | 9       | Lines 293 – 306 |
|                        |     | (c) Explain how missing data were addressed                                                                                                                                                                  | 7       | Lines 222 – 225 |
|                        |     | (d) <i>Cohort study</i> —If applicable, explain how loss to follow-up was addressed                                                                                                                          | NA      | NA              |
|                        |     | <i>Case-control study</i> —If applicable, explain how matching of cases and controls was addressed                                                                                                           | NA      | NA              |
|                        |     | <i>Cross-sectional study</i> —If applicable, describe analytical methods taking account of sampling strategy                                                                                                 | NA      | NA              |
|                        |     | (e) Describe any sensitivity analyses                                                                                                                                                                        | NA      | NA              |
| <b>Results</b>         |     |                                                                                                                                                                                                              |         |                 |
| Participants           | 13* | (a) Report numbers of individuals at each stage of study—eg numbers potentially eligible, examined for eligibility, confirmed eligible, included in the study, completing follow-up, and analysed            | 9 – 10  | 310 – 328       |
|                        |     | (b) Give reasons for non-participation at each stage                                                                                                                                                         | 9 – 10  | 315 – 323       |
|                        |     | (c) Consider use of a flow diagram                                                                                                                                                                           | 9       | 315             |
| Descriptive data       | 14* | (a) Give characteristics of study participants (eg demographic, clinical, social) and information on exposures and potential confounders                                                                     | 10      | 323 – 328       |
|                        |     | (b) Indicate number of participants with missing data for each variable of interest                                                                                                                          | 10 – 11 | 323 – 345       |
|                        |     | (c) <i>Cohort study</i> —Summarise follow-up time (eg, average and total amount)                                                                                                                             | N/A     | N/A             |
| Outcome data           | 15* | <i>Cohort study</i> —Report numbers of outcome events or summary measures over time                                                                                                                          | 14 – 15 | 380 - 386       |
|                        |     | <i>Case-control study</i> —Report numbers in each exposure category, or summary measures of exposure                                                                                                         | N/A     | N/A             |
|                        |     | <i>Cross-sectional study</i> —Report numbers of outcome events or summary measures                                                                                                                           | N/A     | N/A             |
| Main results           | 16  | (a) Give unadjusted estimates and, if applicable, confounder-adjusted estimates and their precision (eg, 95% confidence interval). Make clear which confounders were adjusted for and why they were included | 10 – 15 | 331 – 386       |
|                        |     | (b) Report category boundaries when continuous variables were categorized                                                                                                                                    | 10 – 15 | 332 - 386       |
|                        |     | (c) If relevant, consider translating estimates of relative risk into absolute risk for a meaningful time period                                                                                             | N/A     | N/A             |

Continued on next page

|                          |    |                                                                                                                                                                            |         |           |
|--------------------------|----|----------------------------------------------------------------------------------------------------------------------------------------------------------------------------|---------|-----------|
| Other analyses           | 17 | Report other analyses done—eg analyses of subgroups and interactions, and sensitivity analyses                                                                             | 12 – 15 | 375 – 386 |
| <b>Discussion</b>        |    |                                                                                                                                                                            |         |           |
| Key results              | 18 | Summarise key results with reference to study objectives                                                                                                                   | 15      | 388 – 391 |
| Limitations              | 19 | Discuss limitations of the study, taking into account sources of potential bias or imprecision. Discuss both direction and magnitude of any potential bias                 | 19 – 20 | 499 – 526 |
| Interpretation           | 20 | Give a cautious overall interpretation of results considering objectives, limitations, multiplicity of analyses, results from similar studies, and other relevant evidence | 15 – 19 | 392 - 496 |
| Generalisability         | 21 | Discuss the generalisability (external validity) of the study results                                                                                                      | 20      | 527 – 530 |
| <b>Other information</b> |    |                                                                                                                                                                            |         |           |
| Funding                  | 22 | Give the source of funding and the role of the funders for the present study and, if applicable, for the original study on which the present article is based              | 21      | 552       |

\*Give information separately for cases and controls in case-control studies and, if applicable, for exposed and unexposed groups in cohort and cross-sectional studies.

**Note:** An Explanation and Elaboration article discusses each checklist item and gives methodological background and published examples of transparent reporting. The STROBE checklist is best used in conjunction with this article (freely available on the Web sites of PLoS Medicine at <http://www.plosmedicine.org/>, Annals of Internal Medicine at <http://www.annals.org/>, and Epidemiology at <http://www.epidem.com/>). Information on the STROBE Initiative is available at [www.strobe-statement.org](http://www.strobe-statement.org).



# BMJ Open

## Variation in on-scene time of emergency medical services and the extent of the difference of on-scene time between genders: A retrospective population-based registry study in Riyadh province, Saudi Arabia

|                                 |                                                                                                                                                                                                                                                                                                                                                                                                                                                                                                                                                                                                                                                                                                                                                                                                                           |
|---------------------------------|---------------------------------------------------------------------------------------------------------------------------------------------------------------------------------------------------------------------------------------------------------------------------------------------------------------------------------------------------------------------------------------------------------------------------------------------------------------------------------------------------------------------------------------------------------------------------------------------------------------------------------------------------------------------------------------------------------------------------------------------------------------------------------------------------------------------------|
| Journal:                        | <i>BMJ Open</i>                                                                                                                                                                                                                                                                                                                                                                                                                                                                                                                                                                                                                                                                                                                                                                                                           |
| Manuscript ID                   | bmjopen-2021-052481.R2                                                                                                                                                                                                                                                                                                                                                                                                                                                                                                                                                                                                                                                                                                                                                                                                    |
| Article Type:                   | Original research                                                                                                                                                                                                                                                                                                                                                                                                                                                                                                                                                                                                                                                                                                                                                                                                         |
| Date Submitted by the Author:   | 10-Dec-2021                                                                                                                                                                                                                                                                                                                                                                                                                                                                                                                                                                                                                                                                                                                                                                                                               |
| Complete List of Authors:       | Moafa, H. N.; Jazan University Faculty of Public Health and Tropical Medicine, Health Services Management ; Maastricht University Faculty of Health Medicine and Life Sciences, Health Services Research, CAPHRI School for Public Health and Primary Care<br>van Kuijk, Sander; Maastricht Universitair Medisch Centrum+, Clinical Epidemiology and Medical Technology Assessment<br>Moukhyer, M. E. ; Jazan University, Emergency Medical Services, Faculty of Applied Medical Sciences<br>Alqahtani, D. M.; Saudi Arabia Ministry of Health, Saudi Red Crescent Authority, Department of Innovation and Development<br>Haak , Harm; Maxima Medisch Centrum, Eindhoven ; Maastricht University Faculty of Health Medicine and Life Sciences, Health Services Research, CAPHRI School for Public Health and Primary Care |
| <b>Primary Subject Heading</b>: | Emergency medicine                                                                                                                                                                                                                                                                                                                                                                                                                                                                                                                                                                                                                                                                                                                                                                                                        |
| Secondary Subject Heading:      | Emergency medicine, Health services research                                                                                                                                                                                                                                                                                                                                                                                                                                                                                                                                                                                                                                                                                                                                                                              |
| Keywords:                       | ACCIDENT & EMERGENCY MEDICINE, HEALTH SERVICES ADMINISTRATION & MANAGEMENT, Health policy < HEALTH SERVICES ADMINISTRATION & MANAGEMENT, PUBLIC HEALTH                                                                                                                                                                                                                                                                                                                                                                                                                                                                                                                                                                                                                                                                    |
|                                 |                                                                                                                                                                                                                                                                                                                                                                                                                                                                                                                                                                                                                                                                                                                                                                                                                           |

SCHOLARONE™  
Manuscripts



I, the Submitting Author has the right to grant and does grant on behalf of all authors of the Work (as defined in the below author licence), an exclusive licence and/or a non-exclusive licence for contributions from authors who are: i) UK Crown employees; ii) where BMJ has agreed a CC-BY licence shall apply, and/or iii) in accordance with the terms applicable for US Federal Government officers or employees acting as part of their official duties; on a worldwide, perpetual, irrevocable, royalty-free basis to BMJ Publishing Group Ltd ("BMJ") its licensees and where the relevant Journal is co-owned by BMJ to the co-owners of the Journal, to publish the Work in this journal and any other BMJ products and to exploit all rights, as set out in our [licence](#).

The Submitting Author accepts and understands that any supply made under these terms is made by BMJ to the Submitting Author unless you are acting as an employee on behalf of your employer or a postgraduate student of an affiliated institution which is paying any applicable article publishing charge ("APC") for Open Access articles. Where the Submitting Author wishes to make the Work available on an Open Access basis (and intends to pay the relevant APC), the terms of reuse of such Open Access shall be governed by a Creative Commons licence – details of these licences and which [Creative Commons](#) licence will apply to this Work are set out in our licence referred to above.

Other than as permitted in any relevant BMJ Author's Self Archiving Policies, I confirm this Work has not been accepted for publication elsewhere, is not being considered for publication elsewhere and does not duplicate material already published. I confirm all authors consent to publication of this Work and authorise the granting of this licence.

1  
2  
3 **1 Variation in on-scene time of emergency medical services and the extent of the difference**  
4 **2 of on-scene time between genders: A retrospective population-based registry study in**  
5 **3 Riyadh province, Saudi Arabia**  
6  
7  
8

9 H. N. Moafa, MBBS, MPH\*<sup>1,2,3</sup>, S.M.J. van Kuijk, PhD<sup>3</sup>, M. E. Moukhyer MD, PhD<sup>4</sup>, D. M.  
10 Alqahtani, MIT<sup>5</sup>, H.R Haak, MD, PhD<sup>2,6,7</sup>

11  
12 <sup>1</sup>Department of Health Services Management, Faculty of Public Health and Tropical  
13 Medicine, Jazan University, Jazan, Saudi Arabia

14  
15 <sup>2</sup>Department of Health Services Research, CAPHRI School for Public Health and Primary  
16 Care, Maastricht University, Maastricht, The Netherlands

17  
18 <sup>3</sup>Department of Clinical Epidemiology and Medical Technology Assessment, Maastricht  
19 University Medical Centre+, Maastricht, the Netherlands

20  
21 <sup>4</sup>Department of Emergency Medical Services, Faculty of Applied Medical Sciences, Jazan  
22 University, Jazan, Saudi Arabia

23  
24 <sup>5</sup>Department of Innovation and Development, Saudi Red Crescent Authority, Riyadh, Saudi  
25 Arabia

26  
27 <sup>6</sup>Department of Internal Medicine, Maxima Medisch Centre, Eindhoven, The Netherlands

28  
29 <sup>7</sup>Division of General Internal Medicine, Department of Internal Medicine, Maastricht  
30 University Medical Centre+, Maastricht, The Netherlands

31  
32  
33  
34  
35  
36  
37  
38  
39  
40  
41  
42  
43  
44  
45  
46  
47  
48  
49  
50  
51  
52  
53  
54  
55  
56  
57  
58  
59  
60  
**\*Corresponding author:** H. N. Moafa.

**\*Corresponding author.** Email: h.moafa@maastrichtuniversity.nl & Mobile number:  
+31615373733 & Office number: +31433871391 & Home number: +31438552222

**Word count:** 4762

## 41 ABSTRACT

42 **Objective:** To identify the inter-gender variation of on-scene time (OST) for highly urgent  
43 emergency cases conveyed by Emergency Medical Services (EMS) in Saudi Arabia and to  
44 assess other predictors of OST and hypothesize for possible factors delaying OST.

45 **Design:** A retrospective population-based registry study.

46 **Setting:** Riyadh Province is the largest province in terms of population and the second in terms  
47 of geographical area.

48 **Participants:** All highly urgent transported patients from the scene to emergency departments,  
49 be they medical emergencies or trauma emergencies during 2018.

50 **Outcome measure:** OST difference between men and women transported by EMS.

51 **Results:** In total, 21,878 patients were included for analysis: 33.9% women and 66.1% men.  
52 The median OST for women was 22 minutes (interquartile range [IQR] 15 – 30) and 18 minutes  
53 (IQR 11 – 26) for men,  $p < 0.001$ ; for medical cases, median OST was 23 minutes (IQR 16 –  
54 31) for women compared to 20 minutes (IQR 13 – 29) for men,  $p < 0.001$ ; for trauma cases, the  
55 median OST of both sexes was equal. We found the following additional predictors of OST:  
56 factors of emergency type, sex, age category, geographical areas, type of ambulance vehicle,  
57 and hospital type were all significantly associated with OST in the crude or adjusted analyses.  
58 Factors of emergency type, sex, age category, geographical areas, type of ambulance vehicle,  
59 and hospital type were also significantly associated with the odds of OST of more than 15-  
60 minutes in the crude and adjusted regression analyses.

61 **Conclusion:** The median OST was longer than 15 minutes for more than half of transported  
62 cases. For medical cases, women had a longer median OST than men. Additional predictors  
63 associated with prolonged OST were the patient's age, area (i.e., urban vs. rural), type of  
64 ambulance vehicle, and season. These findings are hypothesis generating and require further  
65 studies.

### 67 Strengths and limitations of this study

- 68 ♦ It is the first study conducted in the Arabian Gulf States that includes a large number  
69 of highly urgent cases.
- 70 ♦ The registry relies on the Saudi Red Crescent Computerized Aid Dispatching  
71 (SRCCAD) system for automated detection of time to compute the timeline.
- 72 ♦ Using registry data has provided us with much statistical power to detect between-group  
73 differences and associations for the available characteristics.

- 1  
2  
3 74     ♦ Registry lacks other important demographic factors related to social status; education,  
4  
5 75     income, and ethnicity, which might be associated with prolonged on-scene time.  
6  
7 76     ♦ Time registered in the database depends on the information provided by emergency  
8  
9 77     medical services (EMS) providers through wireless communications with the call  
10 78     centre; hence, any network failure leads to missed data.  
11  
12 79  
13 80  
14 81  
15 82  
16 83  
17 84  
18 85  
19 86  
20 87  
21 88  
22 89  
23 90  
24 91  
25 92  
26 93  
27 94  
28 95  
29 96  
30 97  
31 98  
32 99  
33 100  
34 101  
35 102  
36 103  
37 104  
38 105  
39 106  
40 107  
41 108  
42 109  
43 110  
44 111  
45 112  
46 113  
47 114  
48 115  
49 116  
50 117  
51 118  
52 119  
53 120  
54  
55  
56  
57  
58  
59  
60

For peer review only

## 121 INTRODUCTION

122 Emergency medical services (EMS) in Saudi Arabia have been well developed during  
123 the last decade. They provide different levels of emergency care around the clock and free of  
124 charge. Women's lower EMS utilization is one of the challenges found, besides the median  
125 total EMS time for high urgent emergency cases was found to be greater than one hour.<sup>1 2</sup> The  
126 on-scene time (OST) duration may take greater than half of the total period of EMS time and  
127 made up the largest proportion of total EMS delays.<sup>3 4</sup> Long OST may lead to consequences  
128 affecting patient outcomes.<sup>5 6</sup> In certain medical circumstances, patients' transportation to a  
129 hospital as soon as possible is highly recommended.<sup>7-10</sup> In the American Heart Association  
130 (AHA) guideline for the early management of stroke patients, it is recommended that the OST  
131 should not exceed 15 minutes.<sup>7</sup>

132 The OST duration can result from the crews' decision to collect patient history and  
133 medical examination.<sup>11</sup> In addition, the period of OST varies according to the patient's status  
134 with or without mortality and geographical areas as urban or rural locations. Sex may also play  
135 a factor in OST. For example, a US study found that OST in women complaining of acute chest  
136 pain was higher than in men as the crew needed more time to apply electrocardiogram.<sup>12</sup> Other  
137 barriers often prolong OST, particularly in trauma cases, when EMS providers' accessibility to  
138 patients is difficult. These barriers can be considered inevitable causes such as waiting for the  
139 police to arrive in an incident resulting from criminal causes or waiting for the fire brigade to  
140 extract a patient from a vehicle or a building. It can also be affected in an outdoor address such  
141 as the street during a mass gathering after road traffic accidents.<sup>11 13</sup> On the other hand, it can  
142 result from patient wishes and family intervention in crews' performance and decision,  
143 especially when the crew is called to a patient's house. Such intervention is significantly  
144 affected by culture and educational level and might differ between urban and rural areas.

145 Factors related to patient culture or demography that influence OST have not been  
146 thoroughly studied in the Arabian Gulf States. A recent systematic review found that EMS  
147 crews in Saudi Arabia consider mass gathering during road traffic accidents as one of the most  
148 frequent barriers affecting their performance to work effectively and in a timely manner while  
149 the presence of the patients' families or bystanders were cited as the second salient barrier.<sup>2 14</sup>  
150 Furthermore, the median of total EMS time in the Riyadh province of Saudi Arabia for trauma  
151 cases was longer in rural areas than in urban areas, and longer than what was found in other  
152 countries such as Denmark and the US.<sup>1 15 16</sup>

153 The present study aimed to investigate OST and to identify differences between sexes  
154 regarding the amount of time spent at the scene by EMS crews. It also aims to identify other

1  
2  
3 155 patient-related factors associated with time spent at the scene for all highly urgent emergency  
4 156 cases that were transported to healthcare facilities in the Riyadh province in Saudi Arabia and  
5  
6 157 to hypothesize for possible factors delaying OST.  
7  
8  
9 158

## 10 159 **METHODS**

### 11 160 **Design**

12  
13 161 This retrospective population-based registry was conducted in the Riyadh province of Saudi  
14  
15 162 Arabia by using all EMS database records in the Saudi Red Crescent Computer Aid  
16  
17 163 Dispatching (SRCCAD) system, from January 1, 2018, to December 31, 2018. This study  
18  
19 164 complies with Strengthening the Reporting of Observational Studies in Epidemiology  
20  
21 165 (STROBE).<sup>17</sup>  
22  
23 166

### 24 167 **Setting**

25 168 Riyadh Province is in the central part of Saudi Arabia. It has a geographical size of 404,240  
26  
27 169 km<sup>2</sup>. It has an approximate population of 6,792,776 million, according to the last national  
28  
29 170 census. The province is composed of 39 different cities and Riyadh city is the capital and the  
30  
31 171 largest city in Saudi Arabia. Besides, there are hundreds of rural villages dotted between or  
32  
33 172 near these cities.<sup>18</sup> In Saudi Arabia, EMS are free of charge and can be accessed by calling the  
34  
35 173 call centre, and in certain exceptional conditions, patients can visit ambulance stations  
36  
37 174 distributed all over the province, including along highways. EMS crews of Riyadh province  
38  
39 175 are mainly composed of two Emergency Medical Technicians (EMT). They are trained on  
40  
41 176 basic life support (BLS) skills to respond to different levels of emergency cases but do not  
42  
43 177 administer medicine. However, some crews are composed of physicians and emergency  
44  
45 178 paramedics. These are called mobile intensive care units (MICU) and respond to certain highly  
46  
47 179 critical cases and provide advanced life support (ALS). A third type of EMS crew consists of  
48  
49 180 senior paramedics and are dispatched in a rapid response non-transporting vehicle (RRNTV).  
50  
51 181 These often arrive earlier to provide ALS before the essential transporting ambulances. Time  
52  
53 182 indicators are built-in SRCCAD with 20 minutes for response time and 15 minutes for OST  
54  
55 183 regardless of urgency level.

56  
57 184 Saudi EMS implements a strategy of scoop and run, which emanated from the Anglo-  
58  
59 185 American model. Most EMS chain periods are limited with a predefined time to end with the  
60  
186 golden hour of total time.<sup>19</sup> The OST comprises three consecutive periods which are access,  
187  
188 treatment, and loading time.<sup>20</sup> Access time starts from ambulance vehicles arrival to the scene  
up to crew arrival to patients' location. Treatment time is the period of patients' examination

1  
2  
3 189 and treatment. Loading time starts from moving patients on the stretcher until the crew starts  
4  
5 190 to travel to the hospital. The policy underpinning this 15-minute benchmark for OST is that  
6  
7 191 the Saudi EMS policymakers, based on the number of available crews and the volume of  
8  
9 192 patients' demands, decided that 15 minutes at the scene fit their operational procedures as a  
10  
11 193 policy target. An additional consideration was to avoid delaying ambulance resources from  
12  
13 194 becoming unavailable for new assignments.

14 195 However, when there are multiple calls for different emergencies at once, SRCCAD  
15  
16 196 may prioritize cases based on three levels of urgency and dispatch crews accordingly. Patients  
17  
18 197 or their families who have guardianship have the right to refuse transportation to hospital after  
19  
20 198 they have signed a formal paper of refusal against medical advice. However, EMS crews can  
21  
22 199 either transport patients to the closest hospitals or treat them at the scene. The study proposal  
23  
24 200 was reviewed and approved by the ethical committee in Jazan University with the registry  
25  
26 201 number: REC39/9-S085. The Ethics Committee, based on no need to contact patients, agreed  
27  
28 202 that informed consent was not required because of the anonymity of the data collected for  
29  
30 203 routine ambulance missions and the study's retrospective design. The study data take into  
31  
32 204 consideration privacy and confidentiality.

33 205

### 34 206 **Participants and public involvement**

35 207 Patients and public were not involved in developing the research question, commenting on the  
36  
37 208 database, study design, outcome measures, conduct of the study, or contributing to the writing  
38  
39 209 or editing of this study.

40 210

### 41 211 **Data collection**

42 212 The data were obtained through the operations and information department in the Riyadh  
43  
44 213 branch directorate of Saudi Red Crescent Authority (SRCA). Data were exported from  
45  
46 214 Microsoft Excel saved in an encrypted file on a hard disc and converted to an IBM SPSS file  
47  
48 215 (version 25) for further analyses.

49 216

### 50 217 **Selection of Participants**

51 218 According to the Saudi EMS definition, highly urgent emergency cases are the cases that  
52  
53 219 contacted EMS for support after exposure to serious or life-threatening illness or injuries that  
54  
55 220 require immediate medical intervention and quick transportation to hospital emergency  
56  
57 221 departments (EDs). In this study, all incoming calls for patients who were triaged at the  
58  
59 222 dispatching centre of SRCCAD as highly urgent emergency cases were included.



1  
2  
3 223 Gynaecological emergencies were excluded because of the scope of the study to compare both  
4  
5 224 sexes. In addition, we excluded records of patients for whom age, sex, or area was missing and  
6  
7 225 cases categorized by the SRCCAD as cases ended by non-conveyance. We considered the  
8  
9 226 potential source of bias; therefore, we excluded the lower extreme outliers with values equal  
10  
11 227 to zero due to system error. Records of missions dispatched for two patients or more in one  
12  
13 228 incident were excluded. Similarly, Missions that involved only Rapid Response Non-  
14  
15 229 Transporting Vehicles (RRNTV) were also removed.

16 230

### 17 231 **Methods of Measurement**

18  
19 232 We included all variables related to patient demographics and information related to  
20  
21 233 dispatching missions from the time period perspective, starting from calling the call centre and  
22  
23 234 ending with the patients' arrival to private and governmental hospitals. The EMS time intervals  
24  
25 235 are composed of 4 different periods.<sup>21</sup> First, the response time, which is the time elapsed  
26  
27 236 starting from receiving a call in the call centre and ended by the ambulance's crew's arrival to  
28  
29 237 the scene. Second, the OST, which is the time elapsed, starting from arrival to the scene and  
30  
31 238 ended by starting to travel back to EMS centre or traveling forward toward healthcare facilities.  
32  
33 239 Third, the travel time, which is the time elapsed from starting to move from the scene until the  
34  
35 240 crew's arrival to healthcare facilities. Fourth, is the hospital period, defined as the time elapsed  
36  
37 241 from arrival to the healthcare facility until handover to emergency room staff. EMS database  
38  
39 242 registry recorded all events starting from activation time and ending by crew's departure from  
40  
41 243 the hospitals in the cases where the patient had been transported or when the crew leaves the  
42  
43 244 scene when transportation had been refused. It measures only response time period and total  
44  
45 245 EMS time period in seconds. Therefore, the total EMS time in this study reflects the four  
46  
47 246 periods. We calculated the OST, travel time, hospital time according to standard EMS  
48  
49 247 definition.<sup>21</sup> Those periods in Saudi EMS have individual target indicators, such as the response  
50  
51 248 time; 20 minutes; the OST is 15 minutes, while the travel time has no indicator because of EMS  
52  
53 249 providers' and patients' safety issue arise if the time indicator too strict due to the risk of driving  
54  
55 250 too fast on the way to hospital. Saudi EMS would consider the OST if it exceeded 15 minutes  
56  
57 251 as a prolonged OST. In cases where the call centre dispatched two or more EMS crews, we  
58  
59 252 selected by calculating the actual time spent with the patient from when the first crew arrived  
60  
253 either the RRNTV or the main transporting ambulance until the patient was transported by  
254 ambulance.

255 In this study, we focused only on the EMS missions that had been registered by  
256 SRCCAD as highly urgent and ended by transporting patients into hospitals. Therefore, we

1  
2  
3 257 clustered emergency cases into two cohorts. The first cohort was the cluster of EMS mission  
4  
5 258 that were dispatched for highly urgent medical emergencies (HUME) such as acute coronary  
6  
7 259 syndrome, stroke, and out-of-hospital cardiac arrest. The second cohort was the missions  
8  
9 260 dispatched for highly urgent trauma emergencies (HUTE) such as road traffic accidents.  
10  
11 261 Demographic features available in the registry that were extracted are sex, age and  
12  
13 262 geographical area. Patients' age was divided into three categories according to Saudi Arabian  
14  
15 263 law; child: patient with an age below 15 years old, adult: patient equal to or over 15 years old  
16  
17 264 but younger than 60 years old, and elderly: patient equal to or more than 60 years old. Urban  
18  
19 265 area was defined as an area where metropolitan and micropolitan cities are located and have a  
20  
21 266 total population of equal to or more than 5000 inhabitants. On the other side, areas with less  
22  
23 267 than 5000 people or outside urban geographical area were considered rural.

24 268 We considered the differences in various EMS operational times from the data collected  
25  
26 269 in a one-year time period. In Saudi Arabia, the weekdays are considered from Sunday to  
27  
28 270 Thursday while the Friday and Saturday are the weekends. Period of the day is categorized into  
29  
30 271 two categories; office time, which is the time that starts from 8:00 AM to 4:00 PM from Sunday  
31  
32 272 to Thursday, while the home time is defined as the time that starts from 4:01 PM on the same  
33  
34 273 day up to the next day 7:59 AM side by side with 48 hours of the weekend Friday and Saturday.  
35  
36 274 Working shifts are the two daily periods that Saudi EMS schedules to provide emergency  
37  
38 275 services. It is composed of two periods: the day shift from 8:00 AM to 8:00 PM and the night  
39  
40 276 shift from 8:00 PM to 8:00 AM. We also included season. The winter season officially starts  
41  
42 277 from Mid-December to Mid-March, then the spring, which starts from Mid-March until Mid-  
43  
44 278 June. Summer starts from Mid-June to Mid-December, followed by Autumn, which starts from  
45  
46 279 Mid-September 21 and ends by Mid-December.<sup>22</sup>

47 280 Operating vehicle types represented by the three types of crews providing EMS for the  
48  
49 281 clustered emergencies were included. The first, Ambulance type II transporting vehicle (BLS-  
50  
51 282 ambulance) is the vehicle equipped by two EMT, who can perform basic life support and rapid  
52  
53 283 patient transport to hospitals. MICU is another transporting vehicle capable of highly qualified  
54  
55 284 physician-based or paramedics exposed to long-term training equal to or more than four years.  
56  
57 285 The last type of vehicle is RRNTV, which is operated in the last decade to arrive at the scene  
58  
59 286 earlier than the transporting vehicle, and it is also operated by highly experienced EMS  
60  
287 providers, often EMS paramedics. The crew of RRNTV can give ALS and do the necessary  
288 medical work to prepare the patients to be transported. Hospitals that receive emergency  
289 patients are of two types. We also included EDs based on the two types of hospitals.  
290 Governmental hospitals are non-profit healthcare organizations funded by the Saudi authorities

291 to provide health services for all Saudi citizens. Private hospitals are for-profit healthcare  
292 organizations operated by non-governmental healthcare firms for healthcare services.

293

## 294 **Statistical Analysis**

295 The median and interquartile range were computed for response time, OST, travel time,  
296 hospital time and total EMS time, and compared between men and women using the Mann-  
297 Whitney U Test. The Kruskal-Wallis and Mann-Whitney U Test were conducted to test for  
298 differences in OST based on different demographics related to patients, stratified by sex. The  
299 following factors were considered: age category, geographical area, period of requesting EMS  
300 services, season, emergency type (medical or trauma), emergency vehicles, type of hospital to  
301 which the patient was transferred.

302 To assess what variables were associated with OST, first simple linear regression was  
303 performed to identify the OST difference between different independent predictive variables.  
304 After that, multivariable linear regression was used to identify which variables were  
305 independently associated with OST.

306 Furthermore, we conducted logistic regression to assess the association between  
307 variables and the odds of an OST of more than 15 minutes based on the SRCCAD indicator.  
308 Data were presented as ORs with 95% CIs. We considered  $p < 0.05$  as statistically significant.

309

## 310 **RESULTS**

### 311 **Characteristics of study subjects**

312 During the study period, 35,944 missions of two types – transporting and non-transporting  
313 vehicles – were dispatched to the scene. RRNTV accounted for 3,397 (9.5%) missions while  
314 the transporting vehicles were 32,547 (90.5%); BLS-Ambulance 25,988 (72.3%), MICU 6,559  
315 (18.2%). Subsequently, 32,547 high emergency patients were transported to Riyadh province  
316 hospitals.

317 Figure 1 presents the flow chart of the transported patients. The study exclusion criteria  
318 of records removal shows that 443 missions records were excluded because of gynaecological  
319 emergencies, and 8,380 missions' records were removed due to missing data related to sex,  
320 age, and geographical area. Given to lower extreme outliers that were registered the OST as a  
321 zero-value due to system errors, 1,898 missions' records were excluded to avoid bias.  
322 Therefore, 24,338 missions that represented 21,878 transported patients were initially included.  
323 However, 2,460 additional records were excluded because they represented supportive  
324 RRNTV's crews who participated as logistic support side by side to BLS-ambulances crews,

325 which were the primary transporting ambulances of the patients. Subsequently, 21,878  
 326 missions of highly urgent emergency patients were included in this study. We found that 14,454  
 327 (66.1%) of cases were male. In total, 14,454 (66.1%) missions were for HUME, and 7,424  
 328 (33.9%) for HUTE. Of all, 66.5% of cases were attended at the scene by BLS-ambulances  
 329 crews, 22.3% by MICU ambulances crews, and 11.2% by two crews; 50% of them are  
 330 RRNTVs, and the remaining 50% were BLS-ambulances.

331

### 332 Main results

333 Table 1 shows time periods of ambulance service runs, including response time, OST, travel  
 334 time, and hospital time. The study showed that each duration of OST and travel time for the  
 335 HUME cohort significantly differed between men and women. The median OST of HUME for  
 336 women 23 minutes (IQR 16 – 31 minutes) was significantly longer than men 20 minutes (IQR  
 337 13 – 29 minutes),  $p < 0.001$ . The median travel time for women 19 minutes (IQR 10 – 29  
 338 minutes) was significantly longer than men 18 minutes (IQR 10 – 29 minutes),  $p < 0.001$ .

339

**Table 1** The consecutive time periods of EMS urgent missions according to the two clustered emergency cases cohorts for 21,878 transported patients.

| EMS Intervals  | Emergency Type  | Male  |                    | Female |                          |
|----------------|-----------------|-------|--------------------|--------|--------------------------|
|                |                 | No.   | Median (IQR)       | No.    | Median (SD) <sup>†</sup> |
| Response Time  | HUM Emergencies | 8,686 | 17.0 (12.5 – 23.2) | 6,912  | 17.0 (12.6 – 23.1)       |
|                | HUT Emergencies | 5,768 | 15.7 (11.2 – 22.0) | 512    | 15.6 (11.5 – 21.5)       |
| On-Scene time  | HUM Emergencies | 8,686 | 20.0 (13.0 – 29.0) | 6,912  | 23.0 (16.0 – 31.0)*      |
|                | HUT Emergencies | 5,768 | 15.0 (9.0 – 21.0)  | 512    | 15.0 (10.0 – 22.0)       |
| Travel time    | HUM Emergencies | 8,686 | 18.0 (10.0 – 29.0) | 6,912  | 19.0 (11.0 – 31.0)*      |
|                | HUT Emergencies | 5,768 | 19.0 (11.0 – 30.0) | 512    | 18.0 (12.0 – 30.0)       |
| Hospital time  | HUM Emergencies | 8,686 | 17.0 (6.0 – 27.0)  | 6,912  | 16.0 (5.0 – 27.0)        |
|                | HUT Emergencies | 5,768 | 18.0 (6.0 – 28.0)  | 512    | 17.0 (6.0 – 29.0)        |
| Total EMS Time | HUM Emergencies | 8,686 | 79.3 (63.7 – 97.1) | 6,912  | 82.8 (67.0 – 99.8)*      |
|                | HUT Emergencies | 5,768 | 73.8 (58.0 – 92.3) | 512    | 74.7 (60.8 – 91.5)       |

<sup>†</sup>Mann-Whitney U Test

\* Statistically significant difference at  $p$ -value  $< 0.05$

EMS, Emergency Medical Services; HUM, High Urgent Medical; HUT, High Urgent Trauma

340

1  
2  
3 341 Table 2 shows the median and IQR stratified by patients' demographic and background  
4  
5 342 factors for both HUTE and HUME causes. The total median OST was significantly longer for  
6  
7 343 women 22 minutes (IQR 15 – 30 minutes) than men 18 minutes (IQR 11 – 26 minutes),  $p =$   
8  
9 344 0.001. Most differences related to OST between men and women were significant, all showing  
10  
11 345 longer OST for women. In addition, all characteristics variables of patients and missions except  
12  
13 346 the daily hours, weekdays, and working shifts were statistically significant among each group  
14  
15 347 of men and women.

15 348

16 349

17 350

18 351

19 352

20 353

21 354

22 355

23 356

24 357

25 358

26 359

27 360

28 361

29 362

30 363

31 364

32 365

33 366

34 367

35 368

36 369

37 370

38 371

39 372

40 373

41 374

**Table 2** Median on-scene time difference between sexes for high urgent transported patients (N=21,878).

|                         | Male          |                     | Female       |                      |
|-------------------------|---------------|---------------------|--------------|----------------------|
|                         | No. (%)       | Median (IQR) †      | No. (%)      | Median (IQR) †,‡     |
| <b>Patients (No./N)</b> | 14,454 (66.1) | 18.0 (11.0 – 26.0)  | 7,424 (33.9) | 22.0 (15.0 – 30.0)*  |
| <b>Emergency type</b>   |               |                     |              |                      |
| HUME                    | 8,686 (60.1)  | 20.0 (13.0 – 29.0)* | 6,912 (93.1) | 23.0 (16.0 – 31.0)** |
| HUTE                    | 5,768 (39.9)  | 15.0 (9.0 – 21.0)*  | 512 (6.9)    | 15.0 (10.0 – 22.0)*  |
| <b>Age Category</b>     |               |                     |              |                      |
| Child <15               | 550 (3.8)     | 14.5 (9.0 – 22.0)*  | 267 (3.6)    | 18.0 (11.0 – 25.0)** |
| Adult 15– <60           | 9,803 (67.8)  | 16.0 (10.0 – 24.0)* | 3,299 (44.4) | 21.0 (14.0 – 29.0)** |
| Elderly ≥60             | 4,101 (28.4)  | 22.0 (15.0 – 30.0)* | 3,858 (52.0) | 23.0 (17.0 – 31.0)** |
| <b>Scene location</b>   |               |                     |              |                      |
| Urban                   | 13,562 (93.8) | 18.0 (12.0 – 26.0)* | 7,238 (97.5) | 22.0 (16.0 – 30.0)** |
| Rural                   | 892 (6.2)     | 11.0 (6.0 – 19.0)*  | 186 (2.5)    | 15.0 (9.0 – 21.0)**  |
| <b>Daily hours</b>      |               |                     |              |                      |
| Home time               | 10,901 (75.4) | 18.0 (11.0 – 26.0)  | 5,433 (73.2) | 22.0 (15.0 – 30.0)*  |
| office time             | 3,553 (24.6)  | 18.0 (11.0 – 26.0)  | 1,991 (26.8) | 22.0 (15.0 – 30.0)*  |
| <b>Week days</b>        |               |                     |              |                      |
| Sun-Thursday            | 10,300 (71.3) | 18.0 (11.0 – 26.0)  | 5,333 (71.8) | 22.0 (15.0 – 30.0)*  |
| Weekend                 | 4,152 (28.7)  | 18.0 (11.0 – 26.0)  | 2,091 (28.2) | 22.0 (15.0 – 30.0)*  |
| <b>Working shift</b>    |               |                     |              |                      |
| Day shift               | 6,770 (46.8)  | 18.0 (11.0 – 26.0)  | 3,652 (49.2) | 22.0 (15.0 – 30.0)*  |
| Night shift             | 7,684 (53.2)  | 18.0 (11.0 – 26.0)  | 3,772 (50.8) | 22.0 (15.0 – 30.0)*  |
| <b>Season</b>           |               |                     |              |                      |
| Winter                  | 3,512 (24.3)  | 19.0 (12.0 – 27.0)* | 1,901 (25.6) | 23.0 (16.0 – 31.0)** |
| Spring                  | 3,583 (24.8)  | 18.0 (11.0 – 26.0)* | 1,756 (23.7) | 22.0 (15.0 – 30.0)** |
| Summer                  | 3,573 (24.7)  | 17.0 (11.0 – 25.0)* | 1,771 (23.9) | 22.0 (15.0 – 30.0)** |
| Autumn                  | 3,786 (26.2)  | 18.0 (12.0 – 25.0)* | 1,996 (26.9) | 22.0 (15.0 – 29.0)** |
| <b>Vehicle types</b>    |               |                     |              |                      |
| BLS                     | 9,722 (67.3)  | 17.0 (10.0 – 24.0)* | 4,817 (64.9) | 21.0 (14.0 – 29.0)** |
| MICU                    | 3,204 (22.2)  | 20.0 (13.0 – 28.0)* | 1,675 (22.6) | 24.0 (17.0 – 31.0)** |
| Two crews§              | 1,528 (10.6)  | 22.0 (16.0 – 30.0)* | 932 (12.6)   | 25.0 (19.0 – 33.0)** |
| <b>Receiving EDs</b>    |               |                     |              |                      |
| Governmental            | 14,391¶       |                     | 7,402♦       |                      |
| Private                 | 12,165 (84.2) | 18.0 (11.0 – 26.0)* | 6,271 (84.5) | 22.0 (15.0 – 30.0)** |
|                         | 2,226 (15.4)  | 19.0 (13.0 – 28.0)* | 1,131 (15.2) | 23.0 (17.0 – 31.0)** |

† KRUSKAL\_WALLIS. ‡Mann-Whitney Test. §Missions attended by rapid response non-transporting vehicles and the essential transporting vehicle. ¶63 removed because of undocumented hospital. ♦22 removed because of undocumented hospital. \*Statistically significance at p-value <0.05 between groups. \*\*Statistically significance at p-value <0.05 within group. \*\*\*Statistically significance at p-value <0.05 within group and between groups. BLS, Basic Life Support; EDs, Emergency Departments; HUME, High Urgent Medical Emergencies; HUTE, High Urgent Trauma Emergencies; MICU, Mobile Intensive Care Unit.

375

376

377

Table 3 illustrates the association between different variables and OST. Emergency type, sex, age category, geographical areas, types of vehicles, and hospital type were all

378 significantly associated with OST in the crude, or adjusted analyses. When adjusted for other  
 379 variables, all besides working hours were retained in the model.

**Table 3** Simple linear and multivariable linear regression of on-scene time according to different predictors (N=21,878).

| Predictors' variable     | No. (%)       | Crude Regression Coefficient (95% CI) | Adjusted Regression Coefficient (95% CI) |
|--------------------------|---------------|---------------------------------------|------------------------------------------|
| <b>Emergency type</b>    |               |                                       |                                          |
| HUME (ref) %(n/N)        | 15,598 (71.3) |                                       |                                          |
| HUTE                     | 6,280 (28.7)  | -6.5 (-6.9 – -6.1)*                   | -4.2 (-4.6 – -3.8)*                      |
| <b>Sex</b>               |               |                                       |                                          |
| Male (ref) %(n/N)        | 14,454 (66.1) |                                       |                                          |
| Female                   | 7,424 (33.9)  | 3.9 (3.6 – 4.3)*                      | 1.8 (1.5 – 2.2)*                         |
| <b>Age category</b>      |               |                                       |                                          |
| Adult (ref) %(n/N)       | 13,102 (59.9) |                                       |                                          |
| Child (<15)              | 817 (3.7)     | -1.5 (-2.4 – -0.5)*                   | -2.3 (-3.2 – -1.4)*                      |
| Elderly (≥60)            | 7,959 (36.4)  | 4.7 (4.3 – 5.1)*                      | 2.1 (1.7 – 2.5)*                         |
| <b>Scene location</b>    |               |                                       |                                          |
| Urban (ref) %(n/N)       | 20,800 (95.1) |                                       |                                          |
| Rural                    | 1,078 (4.9)   | -5.5 (-6.3 – -4.7)*                   | -2.6 (-3.4 – -1.8)*                      |
| <b>Daily hours</b>       |               |                                       |                                          |
| Home time (ref) %(n/N)   | 16,334 (74.7) |                                       |                                          |
| Office time              | 5,544 (25.3)  | 0.5 (0.15 – 0.95)*                    | 0.4 (-0.1 – 1.0)                         |
| <b>Seven days</b>        |               |                                       |                                          |
| Weekdays (ref) %(n/N)    | 15,633 (71.5) |                                       |                                          |
| Weekend                  | 6,245 (28.5)  | -0.2 (-0.4 – 0.4)                     | 0.2 (-0.2 – 0.6)                         |
| <b>Working shift</b>     |               |                                       |                                          |
| Day shift (ref) %(n/N)   | 10,422 (47.6) |                                       |                                          |
| Night shift              | 11,456 (52.4) | -0.5 (-0.84 – -0.14)*                 | -0.1 (-0.5 – 0.3)                        |
| <b>Season</b>            |               |                                       |                                          |
| Summer (ref) %(n/N)      | 5,344 (24.4)  |                                       |                                          |
| Winter                   | 5,413 (24.8)  | 1.4 (0.9 – 1.9)*                      | 0.8 (0.3 – 1.2)*                         |
| Spring                   | 5,339 (24.4)  | 0.3 (-0.2 – 0.8)                      | 0.1 (-0.3 – 0.6)                         |
| Autumn                   | 5,782 (26.4)  | 0.2 (0.3 – 0.6)                       | -0.2 (-0.7 – 0.3)                        |
| <b>Ambulance vehicle</b> |               |                                       |                                          |
| BLS (ref) %(n/N)         | 14,539 (66.5) |                                       |                                          |
| MICU                     | 4,879 (22.3)  | 2.8 (2.3 – 3.2)*                      | 2.3 (1.9 – 2.7)*                         |
| Two Crews†               | 2,460 (11.2)  | 4.9 (4.4 – 5.5)*                      | 3.7 (3.2 – 4.3)*                         |
| <b>Receiving EDs‡</b>    |               |                                       |                                          |
| Governmental (ref)%(n/N) | 18,436 (84.6) |                                       |                                          |
| Private                  | 3,357 (15.4)  | 1.6 (1.1 – 2.0)*                      | 0.9 (0.5 – 1.4)*                         |

† Missions attended by rapid response non-transporting vehicles and the essential transporting vehicle. ‡ 85 records of undocumented hospitals were removed and not counted. \*Statistically significance at p-value <0.05.

BLS, Basic Life Support; EDs, Emergency Departments; HUME, High Urgent Medical Emergencies; HUTE, High Urgent Trauma Emergencies; MICU, Mobile Intensive Care Unit.

380

381 We found that 59.4% of men had an OST of more than 15 minutes compared to 75%  
 382 for women ( $p < 0.001$ ). Table 4 shows the findings of the crude and adjusted logistic regression  
 383 models. Emergency type, sex, age category, geographical areas, types of vehicles, and hospitals  
 384 type were all significantly associated with the odds of OST of more than 15 minutes, both in  
 385 crude and adjusted models.

386

**Table 4** Association of predictor variable and on-scene time longer than 15 minutes  
 (N=21,878)

| Predictive variable              | No. (%)       | Crude Odds Ratio (95% CI) | Adjusted Odds Ratio (95% CI) |
|----------------------------------|---------------|---------------------------|------------------------------|
| <b>Emergency type</b>            |               |                           |                              |
| HUME (ref) %(n/N)                | 15,598 (71.3) |                           |                              |
| HUTE                             | 6,280 (28.7)  | 0.3 (0.3 – 0.4)*          | 0.5 (0.47 – 0.55)*           |
| <b>Sex</b>                       |               |                           |                              |
| Male (ref) %(n/N)                | 14,454 (66.1) |                           |                              |
| Female                           | 7,424 (33.9)  | 2.0 (1.9 – 2.2)*          | 1.4 (1.3 – 1.5)*             |
| <b>Age Category</b>              |               |                           |                              |
| Adult (ref) %(n/N)               | 13,102 (59.9) |                           |                              |
| Child (<15)                      | 817 (3.7)     | 0.72 (0.63 – 0.83)*       | 0.61 (0.5 – 0.7)*            |
| Elderly ( $\geq 60$ )            | 7,959 (36.4)  | 2.5 (2.4 – 2.70)*         | 1.7 (1.6 – 1.8)*             |
| <b>Scene location</b>            |               |                           |                              |
| Urban (ref) %(n/N)               | 20,800 (95.1) |                           |                              |
| Rural                            | 1,078 (4.9)   | 0.3 (0.3 – 0.3)*          | 0.5 (0.4 – 0.6)*             |
| <b>Daily hours</b>               |               |                           |                              |
| Home time (ref) %(n/N)           | 16,334 (74.7) |                           |                              |
| Office time                      | 5,544 (25.3)  | 1.05 (1.0 – 1.1)          | 1.0 (0.9 – 1.1)              |
| <b>Seven days</b>                |               |                           |                              |
| Weekdays (ref) %(n/N)            | 15,633 (71.5) |                           |                              |
| Weekend                          | 6,245 (28.50) | 1.0 (0.9 – 1.0)           | 1.0 (0.9 – 1.0)              |
| <b>Working shift</b>             |               |                           |                              |
| Day shift (ref) %(n/N)           | 10,422 (47.6) |                           |                              |
| Night shift                      | 11,456 (52.4) | 1.0 (0.9 – 1.0)           | 1.0 (0.9 – 1.1)              |
| <b>Season</b>                    |               |                           |                              |
| Summer (ref) % (n/N)             | 5,344 (24.4)  |                           |                              |
| Winter                           | 5,413 (24.8)  | 1.2 (1.1 – 1.3)*          | 1.1 (1.0 – 1.2)*             |
| Spring                           | 5,339 (24.4)  | 1.0 (1.0 – 1.1)           | 1.0 (0.9 – 1.1)              |
| Autumn                           | 5,782 (26.4)  | 1.0 (1.0 – 1.1)           | 1.0 (0.9 – 1.1)              |
| <b>Ambulance vehicle</b>         |               |                           |                              |
| BLS (ref)%(n/N)                  | 14,539 (66.5) |                           |                              |
| MICU                             | 4,879 (22.3)  | 1.7 (1.6 – 1.8)*          | 1.5 (1.4 – 1.7)*             |
| Two Crews <sup>†</sup>           | 2,460 (11.2)  | 2.7 (2.5 – 3.0)*          | 2.2 (2.0 – 2.5)*             |
| <b>Receiving EDs<sup>‡</sup></b> |               |                           |                              |
| Governmental (ref)%(n/N)         | 18,436 (84.6) |                           |                              |
| Private Hospital                 | 3,357 (15.4)  | 1.5 (1.4 – 1.6)*          | 1.3 (1.2 – 1.5)*             |

<sup>†</sup> Missions attended by rapid response non-transporting vehicles and the essential transporting vehicle. <sup>‡</sup> 85 records of undocumented hospitals' EDs were removed and not counted. \*Statistically significance at p-value <0.05.

BLS, Basic Life Support; EDs, Emergency Departments; HUME, High Urgent Medical Emergencies; HUTE, High Urgent Trauma Emergencies; MICU, Mobile Intensive Care Unit.



## 387 DISCUSSION

388 The present study showed that more than 50% of emergency cases had an OST of greater than  
389 15 minutes, which is the Saudi EMS standard time for all crews to perform the standard  
390 operational procedures during OST regardless of urgency level. Although the median OST for  
391 HUTE was closer than HUME to the benchmark of 15 minutes, about 25% of those missions  
392 still took more than 22 minutes. OST was also prolonged when EMS ambulances missions  
393 were dispatched for women, the elderly, in urban areas, during winter, as advanced EMS  
394 services, or for transport to private hospitals. Several studies demonstrated that an increase in  
395 OST was associated with adverse outcome.<sup>3 5 23-26</sup> In addition, the American Stroke Association  
396 guideline recommends OST to be  $\leq 15$  minutes.<sup>7</sup>

397 Children represented 3.7% of EMS missions and had significantly shorter OST. Our  
398 study is consistent with multiple studies that found children's OST to be significantly shorter  
399 than adults.<sup>27 28</sup> In our study, elderly patients had by far the longest median OST. Cultural  
400 restrictions of face coverage for elderly females reduce with an increase in age. Elderly people  
401 of both sexes in Saudi Arabia most ordinarily live on the first floor due to comorbidities and  
402 difficulties climbing up to the upper floors. In our study, although the median OST for elderly  
403 people was longer than adults and children, the inter-gender variation in the OST duration for  
404 elderly people was negligible compared to adults and children. A plausible explanation for  
405 prolonged OST for the elderly might be attributed to the difficulty in communication with them  
406 about the severity of their medical conditions and that more time was required to stabilize  
407 them.<sup>29</sup> A Swedish study found that an increase in age is directly proportional to an increase in  
408 OST.<sup>30</sup> Sullivan et al. found oldest people are significantly associated with longer OST.<sup>31</sup>  
409 However, in another study, no association between age and sex and prolonged OST was  
410 found.<sup>32</sup>

411 Although EMS crews had spent more than 15 minutes for most patients at the scene  
412 before they transported them to hospitals, women were most likely to have longer time than

1  
2  
3 413 men regardless of any explanatory factor. For example, in looking at EMS crew types, we  
4  
5 414 found EMS missions that were dispatched by MICU crews had longer OST than BLS crews,  
6  
7 415 and the dispatching of MICU crews increased the odds of prolonged OST regardless of the  
8  
9 416 patients' gender. This finding is line with Schull et al. who found dispatching ALS crews  
10  
11 417 compared to the BLS crews at the scene increase the OST by 5.6 minutes.<sup>33</sup> Yet, we found that  
12  
13 418 the median OST for MICU crews was longer for women than men, although, our data did not  
14  
15 419 include the type and number of interventions at the scene. Our study revealed EMS crews  
16  
17 420 staying a half-hour or more at the scene for 25 % of adult women regardless of the calls'  
18  
19 421 reasons. We compared this finding with their counterpart of adult men, and we found the  
20  
21 422 difference was at a minimum 5 minutes. Given the unavailable data elucidating number and  
22  
23 423 type of medical interventions at the scene, we are unable to clarify the medical reasons  
24  
25 424 triggering this difference. Moreover, our study data cannot reveal whether women could  
26  
27 425 receive less or more intervention than men at the scene. For example, studies in the US showed  
28  
29 426 women had received less EMS interventions and treatment compared to men.<sup>34 35</sup> Although we  
30  
31 427 look for explanations in Saudi EMS setting, the gender differences are not confined to our  
32  
33 428 study. Our findings are in line with several studies from other countries often found that women  
34  
35 429 had a longer median or average OST compared to men.<sup>12 28 29 31 33 34</sup> None of these studies  
36  
37 430 investigated the impact of different sociocultural factors on spent time at the scene for patients.  
38  
39 431 One of these found that women had more extended OST than men for non-ST-elevation  
40  
41 432 myocardial infarction and ST-elevation myocardial infarction, despite ECG being  
42  
43 433 implemented for both men and women.<sup>12</sup>

44  
45 434 In our study, OST and total EMS time for HUME were longer for women than men,  
46  
47 435 while missions dispatched to HUTE did not show any difference. HUME missions may be  
48  
49 436 more often for patients in household buildings than to HUTE missions that may be dispatched  
50  
51 437 more often to open areas such as streets (e.g., for vehicle accidents). Most of HUTE are  
52  
53  
54  
55  
56  
57  
58  
59  
60

1  
2  
3 438 involved by third parties like the Saudi Police which limit any cultural barriers. While in  
4  
5 439 HUME, the profound sex difference in median OST in HUME missions might primarily be  
6  
7  
8 440 explained by Saudi house design and culture. It is customary in Saudi Arabia for the upper  
9  
10 441 floors and rooms far from the residential home's main entrance to be a suitable residence for  
11  
12 442 women. It has been proven that house design has an impact on delaying the access time to the  
13  
14 443 patient after crew arrival to the scene.<sup>36 37</sup> Saudi houses are relatively large due to the high  
15  
16 444 average number of family members.<sup>38</sup> When EMS crews arrive at the scene, they must usually  
17  
18 445 walk a longer distance to reach the female-patient locations. Moreover, cultural differences in  
19  
20 446 Saudi Arabia require women to be fully covered at the presence of non-primary relative male  
21  
22 447 such the EMS all-males crews and that is why it might take a considerable time before the crew  
23  
24 448 are allowed access to the patient.

25  
26  
27  
28 449 Another possible reason for the delay during the scene period for Saudi women is the  
29  
30 450 loading process into ambulance vehicles by all-male crews. This process would require strict  
31  
32 451 adherence by crews' members to use the ambulance stretchers even if the patient can walk  
33  
34 452 independently or with crew members' support. While for Saudi men, the stretcher could be  
35  
36 453 waived if the patient prefers walking without it. However, to the best of our knowledge, no  
37  
38 454 previous study has investigated the influence of culture and home design and whether they  
39  
40 455 have a role in prolonging the OST duration for men or women. Thus, further research on this  
41  
42 456 topic is warranted.

43  
44  
45  
46  
47 457 In Saudi culture, men are usually involved in decision-making related to the  
48  
49 458 transportation of children and elderly of both sexes, and women of all ages. Some Saudi women  
50  
51 459 demand that their primary male relative is present to discuss their health status and plan further  
52  
53 460 action. Some still need guardianship for signing the consent for medical intervention, although  
54  
55 461 they have the right to sign it themselves.<sup>39 40</sup> In specific circumstances, the women's guardian  
56  
57 462 can prohibit them from transportation to the hospital by ambulance.<sup>41</sup> A Saudi study found that  
58  
59  
60

1  
2  
3 463 Saudi women had lower health literacy than men.<sup>42</sup> Two other Saudi studies revealed that  
4  
5 464 Saudi women were less likely to use EMS and were more likely to refuse transportation by  
6  
7  
8 465 ambulance than men.<sup>143</sup> Therefore, the longer OST among women might be explained by their  
9  
10 466 reluctance to be transported and that the ambulance crew spent more time to educate them and  
11  
12 467 their guardians about the importance of ambulance transportation. Further qualitative research  
13  
14 468 may be needed to identify factors that lead to prolonged OST at households. This study lacks  
15  
16 469 the data necessary to do so. No previous narrative inquiry has been performed to study this  
17  
18 470 phenomenon in Saudi Arabia. An Australian qualitative study investigated the barriers  
19  
20 471 confronting paramedics because of cultural barriers of middle eastern people living in Australia  
21  
22 472 who might have a cultural resemblance to Saudi people.<sup>44</sup> The informants' paramedics stated  
23  
24 473 that they found difficulties in providing care due to specific norms and behaviour emanating  
25  
26 474 from middle east culture, and time management at the home locations was affected.<sup>44</sup>

27  
28  
29  
30 475 A significant delay on the scene can deprive women of receiving important medical  
31  
32 476 intervention, unable to be provided by the ambulance crew, in a timely manner in definitive  
33  
34 477 care especially in life-threatening cases. Due to the longer OST for women, they are more  
35  
36 478 exposed to unexpected adverse events such as late or unsafe arrival to hospitals, especially  
37  
38 479 when the crews are committed to not exceeding the golden hour, the benchmark related to the  
39  
40 480 total EMS time, and risk road accidents themselves.

41  
42  
43  
44 481

### 45 482 **Strengths and limitations**

46  
47 483 Our study as a retrospective study has several limitations, all pertaining to the EMS registry.  
48  
49 484 The registry relies on the SRCCAD automated detection of time to compute the timeline.  
50  
51 485 However, one-fourth of data were missing, and we observed impossible outliers that may have  
52  
53 486 arisen due to network failure during the communication between call centre and crews at the  
54  
55 487 scene. Our exclusion of those missing data and outliers might have induced selection bias.  
56  
57  
58  
59  
60

1  
2  
3 488 Another limitation is the non-availability of variables that may explain the gender differences  
4  
5 489 in more details, such as socioeconomic characteristics, time between onset of symptoms and  
6  
7 490 EMS call, type of treatment at the scene, and OST stratified by its four phases: arrival at the  
8  
9 491 scene until accessing the patient, patient assessment time, treatment phase, and loading time.  
10  
11 492 On the other hand, using registry data has provided us with much statistical power to detect  
12  
13 493 between-group differences and associations for the characteristics that were available.  
14  
15

16  
17 494 Perceived urgency and severity rely on the call centre's triaging system and additional  
18  
19 495 confirmation by crews during arrival at the scene, which might not reflect the real patient  
20  
21 496 condition when the patients arrive at the hospital. Therefore, some misclassification in the  
22  
23 497 urgency types may have occurred. However, our data do reflect daily practices in which  
24  
25 498 urgency levels are determined as early during the mission as possible. However, with future  
26  
27 499 involvement in the EMS data set, researchers could explain those reasonable and unavoidable  
28  
29 500 causes that lead to the lateness.  
30  
31

32  
33 501 Considering the linking of the registry data to outcomes data on patients' receiving  
34  
35 502 hospital data such as mortality, 28-day survival, and 6-month survival, we showed OST  
36  
37 503 statistical significance between sexes but limited to show the clinical significance. The last  
38  
39 504 limitation belongs to the study design of clustering heterogeneous emergency types into two  
40  
41 505 cohorts and the Saudi benchmarks of 15-minutes. As a result, our study cannot compare our  
42  
43 506 finding of OST with the essential international guideline like AHA of the recommended OST  
44  
45 507 for specific emergency cases like out-of-hospital cardiac arrest, acute coronary syndrome, and  
46  
47 508 stroke. However, our study showed that female time to access definitive care during medical  
48  
49 509 emergencies is more extended. With future involvement in the EMS data set, researchers could  
50  
51 510 explain the relationship between time performance and EMS outcomes.  
52  
53

54  
55 511 Finally, our study's generalizability might apply to urban and rural areas of other  
56  
57 512 different Saudi provinces and the other Arabian Gulf States having similar EMS systems except  
58  
59  
60

1  
2  
3 513 for Macca city in Saudi Arabia because of Hajj and the influx of Muslims gathering during  
4  
5 514 different seasons.  
6  
7  
8 515

## 10 516 **CONCLUSIONS**

12 517 This study shows that median OST was longer than 15 minutes for more than half of  
13  
14 518 transported cases. In addition, it was longer for women for HUME at every time and place,  
15  
16 519 regardless of age category, crew type, and receiving hospital. For those EMS missions that had  
17  
18 520 been dispatched for HUTE, there was no difference. Furthermore, missions to children, in rural  
19  
20 521 areas, for trauma patients, for crews dispatched by BLS-ambulances, in summer as a season,  
21  
22 522 or transported to EDs of governmental hospitals were all significant predictors for shorter OST.  
23  
24 523 These findings are hypothesis generating and require further studies.  
25  
26  
27  
28  
29 524

30 525 **Authors' Contribution:** All authors conceived the study, conceptualize the ideas, supervised  
31  
32 526 the study design and definition of essential terms and study measures. H.N.M, S.M.J.V.K, and  
33  
34 527 DMA performed the data cleaning, management, and analysis. H.N.M was the formal analysis,  
35  
36 528 and S.M.J.V.K provided statistical advice on study design and analysis. H.N.M and DMA had  
37  
38 529 full access to all of the data in the study. H.N.M takes responsibility for the integrity of the data  
39  
40 530 and the accuracy of data analysis. H.N.M, S.M.J.V.K, M.E.M, and H.R.H interpreted the data.  
41  
42 531 H.N.M and H.R.H were the project administrators. H.R.H was the primary supervisor. H.N.M  
43  
44 532 drafted the manuscript, and all authors contributed substantially to its revision. H.N.M takes  
45  
46 533 responsibility for the paper as a whole.  
47  
48  
49 534

47 535 **Conflicts of interest:** no conflicts.  
48  
49 536

50 537 **Funding and support:** None.  
51  
52 538

53 539 **Ethics approval:** The study proposal was reviewed and approved by the ethical committee  
54  
55 540 in Jazan University with the registry number: REC39/9-S085.  
56  
57 541

57 542 **Data availability statement:** Data are available upon reasonable request.  
58  
59 543  
60 544  
60 545

1  
2  
3 546 Reference:  
4 547

- 5 548 1. Moafa HN, van Kuijk SMJ, Alqahtani DM, et al. Disparities between Rural and Urban Areas  
6 549 of the Central Region of Saudi Arabia in the Utilization and Time-Centeredness of  
7 550 Emergency Medical Services. *International Journal of Environmental Research and  
8 551 Public Health* 2020;17(21):7944. doi: 10.3390/ijerph17217944
- 9 552 2. Moafa HN, Kuijk SMJv, Franssen GHLM, et al. What is known about the quality of out-of-  
10 553 hospital emergency medical services in the Arabian Gulf States? A systematic review.  
11 554 *PLOS ONE* 2019;14(12):e0226230. doi: 10.1371/journal.pone.0226230
- 12 555 3. Brown JB, Rosengart MR, Forsythe RM, et al. Not all prehospital time is equal: Influence of  
13 556 scene time on mortality. *The journal of trauma and acute care surgery*  
14 557 2016;81(1):93-100. doi: 10.1097/TA.0000000000000999
- 15 558 4. Alrawashdeh A, Nehme Z, Williams B, et al. Emergency medical service delays in ST-  
16 559 elevation myocardial infarction: a meta-analysis. *Heart (British Cardiac Society)*  
17 560 2020;106(5):365-73. doi: 10.1136/heartjnl-2019-315034
- 18 561 5. Ruelas OS, Tschautscher CF, Lohse CM, et al. Analysis of Prehospital Scene Times and  
19 562 Interventions on Mortality Outcomes in a National Cohort of Penetrating and Blunt  
20 563 Trauma Patients. *Prehospital Emergency Care* 2018;22(6):691-97. doi:  
21 564 10.1080/10903127.2018.1448494
- 22 565 6. Seamon MJ, Fisher CA, Gaughan J, et al. Prehospital procedures before emergency  
23 566 department thoracotomy: "scoop and run" saves lives. *The Journal of trauma*  
24 567 2007;63(1):113-20. doi: 10.1097/TA.0b013e31806842a1
- 25 568 7. Jauch EC, Saver JL, Adams HP, et al. Guidelines for the Early Management of Patients With  
26 569 Acute Ischemic Stroke. *Stroke* 2013;44(3):870-947. doi:  
27 570 doi:10.1161/STR.0b013e318284056a
- 28 571 8. Campbell BCV, De Silva DA, Macleod MR, et al. Ischaemic stroke. *Nature Reviews Disease*  
29 572 *Primers* 2019;5(1):70. doi: 10.1038/s41572-019-0118-8
- 30 573 9. Lockey DJ, Weaver AE, Davies GE. Practical translation of hemorrhage control techniques  
31 574 to the civilian trauma scene. *Transfusion* 2013;53 Suppl 1:17s-22s. doi:  
32 575 10.1111/trf.12031 [published Online First: 2013/01/18]
- 33 576 10. Salomone JP, Ustin JS, McSwain NE, Jr., et al. Opinions of trauma practitioners regarding  
34 577 prehospital interventions for critically injured patients. *The Journal of trauma*  
35 578 2005;58(3):509-15. doi: 10.1097/01.TA.0000152807.63559.2E
- 36 579 11. Vincent-Lambert C, Mottershaw T. Views of emergency care providers about factors that  
37 580 extend on-scene time intervals. *African journal of emergency medicine* 2018;8(1):1-  
38 581 5. doi: 10.1016/j.afjem.2017.08.003
- 39 582 12. Aguilar SA, Patel M, Castillo E, et al. Gender differences in scene time, transport time,  
40 583 and total scene to hospital arrival time determined by the use of a prehospital  
41 584 electrocardiogram in patients with complaint of chest pain. *The Journal of  
42 585 emergency medicine* 2012;43(2):291-7. doi: 10.1016/j.jemermed.2011.06.130  
43 586 [published Online First: 2012/02/14]
- 44 587 13. Luo W, Yao J, Mitchell R, et al. Spatiotemporal access to emergency medical services in  
45 588 Wuhan, China: accounting for scene and transport time intervals. *International  
46 589 Journal of Health Geographics* 2020;19(1):52. doi: 10.1186/s12942-020-00249-7
- 47 590 14. Alanazi AF. Emergency medical services in Saudi Arabia: A study on the significance of  
48 591 paramedics and their experiences on barriers as inhibitors of their efficiency. *Int J  
49 592 Appl Basic Med Res* 2012;2(1):34-37. doi: 10.4103/2229-516X.96803
- 50  
51  
52  
53  
54  
55  
56  
57  
58  
59  
60

- 1  
2  
3 593 15. Mell HK, Mumma SN, Hiestand B, et al. Emergency Medical Services Response Times in  
4 594 Rural, Suburban, and Urban Areas. *JAMA surgery* 2017;152(10):983-84. doi:  
5 595 10.1001/jamasurg.2017.2230 [published Online First: 2017/07/21]  
6  
7 596 16. Mills EHA, Aasbjerg K, Hansen SM, et al. Prehospital time and mortality in patients  
8 597 requiring a highest priority emergency medical response: a Danish registry-based  
9 598 cohort study. *BMJ Open* 2019;9(11):e023049. doi: 10.1136/bmjopen-2018-023049  
10  
11 599 17. von Elm E, Altman DG, Egger M, et al. The Strengthening the Reporting of Observational  
12 600 Studies in Epidemiology (STROBE) statement: guidelines for reporting observational  
13 601 studies. *Journal of clinical epidemiology* 2008;61(4):344-9. doi:  
14 602 10.1016/j.jclinepi.2007.11.008  
15  
16 603 18. The General Authority for Statistics in Saudi Arabia. Saudi arabian census report for 2010  
17 604 Saudi Arabia: The General Authority for Statistics in Saudi Arabia.; 2021 [194].  
18 605 Available from: <https://www.stats.gov.sa/en/73> accessed March 15, 2021.  
19  
20 606 19. Lerner EB, Moscati RM. The Golden Hour: Scientific Fact or Medical "Urban Legend"?  
21 607 *Academic Emergency Medicine* 2001;8(7):758-60. doi: 10.1111/j.1553-  
22 608 2712.2001.tb00201.x  
23  
24 609 20. Meislin HW, Conn JB, Conroy C, et al. Emergency medical service agency definitions of  
25 610 response intervals. *Annals of Emergency Medicine* 1999;34(4, Part 1):453-58. doi:  
26 611 10.1016/S0196-0644(99)80046-8  
27  
28 612 21. Spaite DW, Valenzuela TD, Meislin HW, et al. Prospective validation of a new model for  
29 613 evaluating emergency medical services systems by in-field observation of specific  
30 614 time intervals in prehospital care. *Annals of Emergency Medicine* 1993;22(4):638-45.  
31 615 doi: 10.1016/S0196-0644(05)81840-2  
32  
33 616 22. Saudi Tourism Authority. The seasons and climate in Saudi Arabia Riyadh, Saudi Arabia:  
34 617 Saudi Tourism Authority; 2021 [Available from:  
35 618 [https://www.visitsaudi.com/en/understand/climate-and-  
36 619 seasons#:~:text=Contrary%20to%20popular%20belief%2C%20it's,overview%20of%20of%20the%20kingdom's%20weather.March15](https://www.visitsaudi.com/en/understand/climate-and-seasons#:~:text=Contrary%20to%20popular%20belief%2C%20it's,overview%20of%20the%20kingdom's%20weather.March15), 2021.  
37  
38 621 23. Johnson NJ, Carr BG, Salhi R, et al. Characteristics and outcomes of injured patients  
39 622 presenting by private vehicle in a state trauma system. *The American journal of*  
40 623 *emergency medicine* 2013;31(2):275-81. doi: 10.1016/j.ajem.2012.07.023  
41  
42 624 24. McCoy CE, Menchine M, Sampson S, et al. Emergency medical services out-of-hospital  
43 625 scene and transport times and their association with mortality in trauma patients  
44 626 presenting to an urban Level I trauma center. *Annals of emergency medicine*  
45 627 2013;61(2):167-74. doi: 10.1016/j.annemergmed.2012.08.026  
46  
47 628 25. Hang AP, Ki Ok A, Eui Jung L, et al. Association between Survival and Time of On-Scene  
48 629 Resuscitation in Refractory Out-of-Hospital Cardiac Arrest: A Cross-Sectional  
49 630 Retrospective Study. *International Journal of Environmental Research and Public*  
50 631 *Health*; 18(496).  
51  
52 632 26. Poppe M, Krammel M, Clodi C, et al. Management of EMS on-scene time during  
53 633 advanced life support in out-of-hospital cardiac arrest: a retrospective observational  
54 634 trial. *European Heart Journal: Acute Cardiovascular Care* 2020;9(4\_suppl):S82-S89.  
55 635 doi: 10.1177/2048872620925681  
56  
57 636 27. Wyen H, Lefering R, Maegele M, et al. The golden hour of shock - how time is running  
58 637 out: prehospital time intervals in Germany--a multivariate analysis of 15, 103  
59 638 patients from the TraumaRegister DGU(R). *Emergency medicine journal : EMJ*  
60 639 2013;30(12):1048-55. doi: 10.1136/emermed-2012-201962



- 1  
2  
3 640 28. Ashburn NP, Hendley NW, Angi RM, et al. Prehospital Trauma Scene and Transport  
4 641 Times for Pediatric and Adult Patients. *West J Emerg Med* 2020;21(2):455-62. doi:  
5 642 10.5811/westjem.2019.11.44597
- 6 643 29. Fok PT, Teubner D, Purdell-Lewis J, et al. Predictors of prehospital on-scene time in an  
7 644 Australian emergency retrieval service. *Prehospital and disaster medicine*  
8 645 2019;34(3):317-21. doi: 10.1017/S1049023X19004394
- 9 646 30. Hjalmarsson A, Holmberg M, Asp M, et al. Characteristic patterns of emergency  
10 647 ambulance assignments for older adults compared with adults requiring emergency  
11 648 care at home in Sweden: a total population study. *BMC Emergency Medicine*  
12 649 2020;20(1):94. doi: 10.1186/s12873-020-00387-y
- 13 650 31. Sullivan AL, Beshansky JR, Ruthazer R, et al. Factors associated with longer time to  
14 651 treatment for patients with suspected acute coronary syndromes: a cohort study.  
15 652 *Circulation Cardiovascular quality and outcomes* 2014;7(1):86-94. doi:  
16 653 10.1161/CIRCOUTCOMES.113.000396
- 17 654 32. Nagata I, Abe T, Nakata Y, et al. Factors related to prolonged on-scene time during  
18 655 ambulance transportation for critical emergency patients in a big city in Japan: a  
19 656 population-based observational study. *BMJ Open* 2016;6(1):e009599. doi:  
20 657 10.1136/bmjopen-2015-009599
- 21 658 33. Cone DC. Emergency department overcrowding and ambulance transport delays for  
22 659 patients with chest pain. *Annals of Emergency Medicine* 2004;43(3):425-26. doi:  
23 660 10.1016/j.annemergmed.2003.12.016
- 24 661 34. Lewis JF, Zeger SL, Li X, et al. Gender differences in the quality of EMS care nationwide  
25 662 for chest pain and out-of-hospital cardiac arrest. *Women's Health Issues*  
26 663 2019;29(2):116-24. doi: 10.1016/j.whi.2018.10.007
- 27 664 35. Rothrock SG, Brandt P, Godfrey B, et al. I S T H E R E G E N D E R B I A S I N T H E P R E H O S P I T A L  
28 665 M A N A G E M E N T O F P A T I E N T S W I T H A C U T E C H E S T P A I N ? *Prehospital Emergency*  
29 666 *Care* 2001;5(4):331-34. doi: 10.1080/10903120190939454
- 30 667 36. Morrison LJ, Angelini MP, Vermeulen MJ, et al. Measuring the EMS Patient Access Time  
31 668 Interval and the Impact of Responding to High-rise Buildings. *PREHOSPITAL*  
32 669 *EMERGENCY CARE* 2005;9(1):14-18. doi: 10.1080/10903120590891679
- 33 670 37. Drennan IR, Strum RP, Byers A, et al. Out-of-hospital cardiac arrest in high-rise buildings:  
34 671 delays to patient care and effect on survival. *CMAJ : Canadian Medical Association*  
35 672 *Journal* 2016;188(6):413-19. doi: 10.1503/cmaj.150544
- 36 673 38. Abdul Salam A, Elsegaey I, Khraif R, et al. Population distribution and household  
37 674 conditions in Saudi Arabia: reflections from the 2010 Census. *Springerplus*  
38 675 2014;3:530-30. doi: 10.1186/2193-1801-3-530
- 39 676 39. Al-Amoudi S. The Right of Saudi Women to Sign for their Health Care in Saudi Arabia,  
40 677 Fact and Fiction. *LIFE SCIENCE JOURNAL-ACTA ZHENGZHOU UNIVERSITY OVERSEAS*  
41 678 *EDITION* 2012;9(4):3143-46.
- 42 679 40. Al-Amoudi SM. Health empowerment and health rights in Saudi Arabia. *Saudi Med J*  
43 680 2017;38(8):785-87. doi: 10.15537/smj.2017.8.19832
- 44 681 41. Aldosari H. The effect of gender norms on women's health in Saudi Arabia: Arab Gulf  
45 682 States Institute in Washington Washington, DC 2017:7.
- 46 683 42. Almubark R, Basyouni M, Alghanem A, et al. Health literacy in Saudi Arabia: Implications  
47 684 for public health and healthcare access. *Pharmacology Research & Perspectives*  
48 685 2019;7(4) doi: 10.1002/prp2.514
- 49  
50  
51  
52  
53  
54  
55  
56  
57  
58  
59  
60

1  
2  
3  
4  
5  
6  
7  
8  
9  
10  
11  
12  
13  
14  
15  
16  
17  
18  
19  
20  
21  
22  
23  
24  
25  
26  
27  
28  
29  
30  
31  
32  
33  
34  
35  
36  
37  
38  
39  
40  
41  
42  
43  
44  
45  
46  
47  
48  
49  
50  
51  
52  
53  
54  
55  
56  
57  
58  
59  
60

686 43. Moafa HN, van Kuijk SMJ, Moukhyer ME, et al. Non-Conveyance Due to Patient-Initiated  
687 Refusal in Emergency Medical Services: A Retrospective Population-Based Registry  
688 Analysis Study in Riyadh Province, Saudi Arabia. *International journal of*  
689 *environmental research and public health* 2021;18(17) doi: 10.3390/ijerph18179252  
690 44. Hartley PR. Paramedic practice and the cultural and religious needs of pre-hospital  
691 patients in Victoria. Victoria University, 2012.  
692

693 Figure 1 Flow chart of included and excluded patients.  
694 BLS, Basic Life Support; MICU, Mobile Intensive Care Unit; RRNTV, Rapid Response Non-Transporting Vehicle.  
695  
696

For peer review only

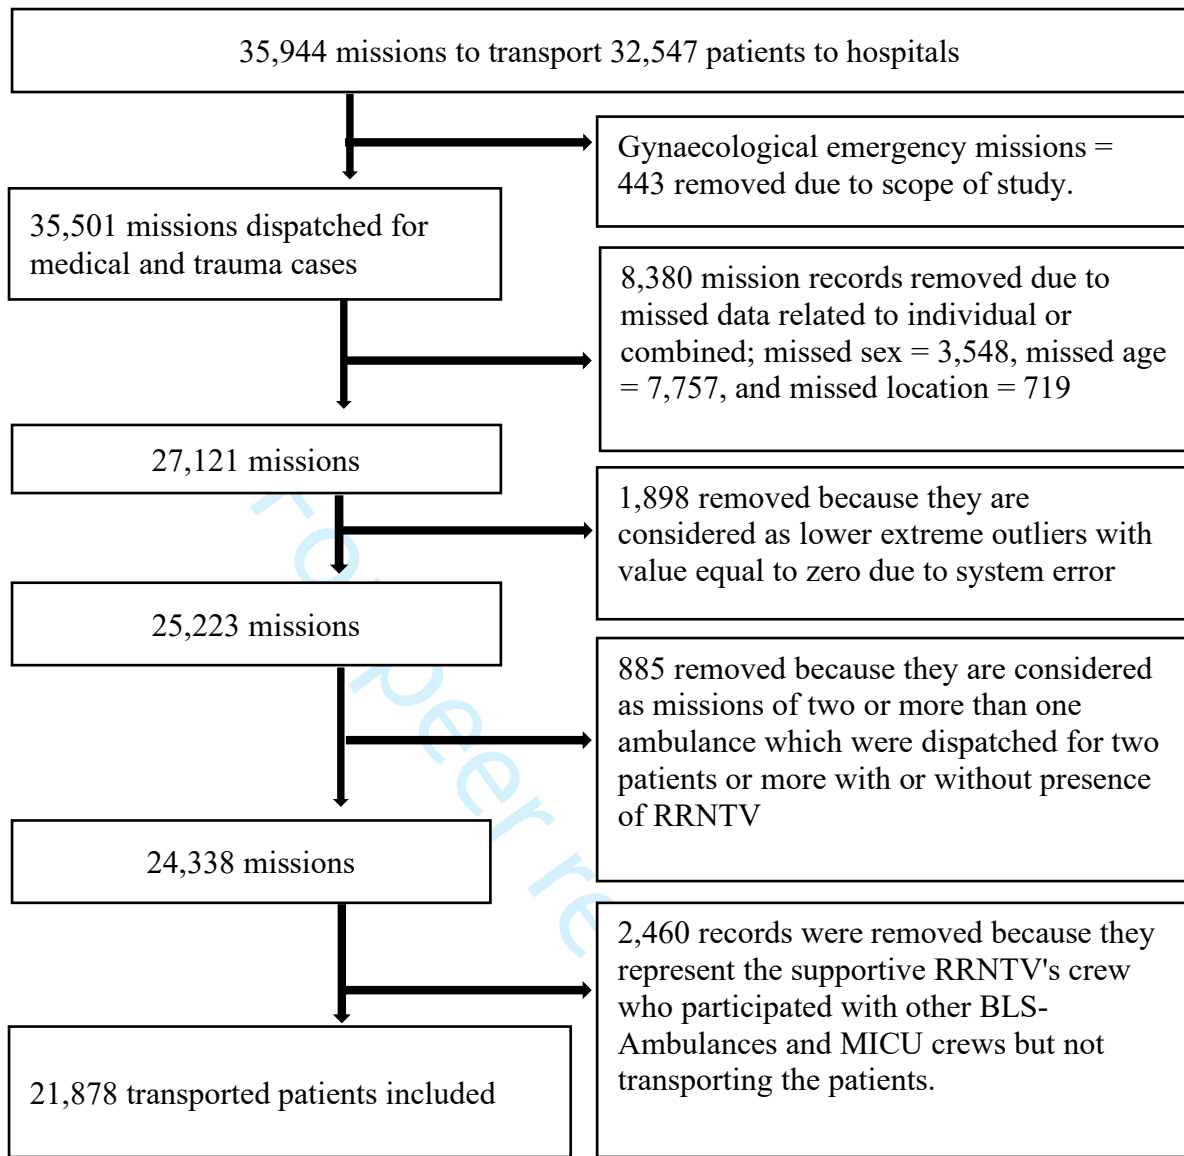

## STROBE Statement—checklist of items that should be included in reports of observational studies

|                              | Item No. | Recommendation                                                                                                                                                                             | Page No. | Relevant text from manuscript |
|------------------------------|----------|--------------------------------------------------------------------------------------------------------------------------------------------------------------------------------------------|----------|-------------------------------|
| <b>Title and abstract</b>    | 1        | (a) Indicate the study's design with a commonly used term in the title or the abstract                                                                                                     | 2        | Line 45                       |
|                              |          | (b) Provide in the abstract an informative and balanced summary of what was done and what was found                                                                                        | 2        | Lines 45 – 62                 |
| <b>Introduction</b>          |          |                                                                                                                                                                                            |          |                               |
| Background/rationale         | 2        | Explain the scientific background and rationale for the investigation being reported                                                                                                       | 4        | Lines 121 – 151               |
| Objectives                   | 3        | State specific objectives, including any prespecified hypotheses                                                                                                                           | 4 – 5    | Lines 152 – 155               |
| <b>Methods</b>               |          |                                                                                                                                                                                            |          |                               |
| Study design                 | 4        | Present key elements of study design early in the paper                                                                                                                                    | 5        | Lines 159 – 163               |
| Setting                      | 5        | Describe the setting, locations, and relevant dates, including periods of recruitment, exposure, follow-up, and data collection                                                            | 5 – 6    | Lines 166 – 202               |
| Participants                 | 6        | (a) <i>Cohort study</i> —Give the eligibility criteria, and the sources and methods of selection of participants. Describe methods of follow-up                                            | 6 – 7    | Lines 216 – 227               |
|                              |          | <i>Case-control study</i> —Give the eligibility criteria, and the sources and methods of case ascertainment and control selection. Give the rationale for the choice of cases and controls |          |                               |
|                              |          | <i>Cross-sectional study</i> —Give the eligibility criteria, and the sources and methods of selection of participants                                                                      |          |                               |
|                              |          | (b) <i>Cohort study</i> —For matched studies, give matching criteria and number of exposed and unexposed                                                                                   |          |                               |
|                              |          | <i>Case-control study</i> —For matched studies, give matching criteria and the number of controls per case                                                                                 |          |                               |
| Variables                    | 7        | Clearly define all outcomes, exposures, predictors, potential confounders, and effect modifiers. Give diagnostic criteria, if applicable                                                   | 7 – 9    | Lines 230 – 290               |
| Data sources/<br>measurement | 8*       | For each variable of interest, give sources of data and details of methods of assessment (measurement). Describe comparability of assessment methods if there is more than one group       | 7 – 9    | Lines 230 – 306               |
| Bias                         | 9        | Describe any efforts to address potential sources of bias                                                                                                                                  | 7        | Lines 223 – 227               |
| Study size                   | 10       | Explain how the study size was arrived at                                                                                                                                                  | 6 – 7    | Lines 216 – 227               |

Continued on next page

|                        |     |                                                                                                                                                                                                              |         |                 |
|------------------------|-----|--------------------------------------------------------------------------------------------------------------------------------------------------------------------------------------------------------------|---------|-----------------|
| Quantitative variables | 11  | Explain how quantitative variables were handled in the analyses. If applicable, describe which groupings were chosen and why                                                                                 | 7 – 9   | Lines 230 – 290 |
| Statistical methods    | 12  | (a) Describe all statistical methods, including those used to control for confounding                                                                                                                        | 9       | Lines 293 – 306 |
|                        |     | (b) Describe any methods used to examine subgroups and interactions                                                                                                                                          | 9       | Lines 293 – 306 |
|                        |     | (c) Explain how missing data were addressed                                                                                                                                                                  | 7       | Lines 222 – 225 |
|                        |     | (d) <i>Cohort study</i> —If applicable, explain how loss to follow-up was addressed                                                                                                                          | NA      | NA              |
|                        |     | <i>Case-control study</i> —If applicable, explain how matching of cases and controls was addressed                                                                                                           | NA      | NA              |
|                        |     | <i>Cross-sectional study</i> —If applicable, describe analytical methods taking account of sampling strategy                                                                                                 | NA      | NA              |
|                        |     | (e) Describe any sensitivity analyses                                                                                                                                                                        | NA      | NA              |
| <b>Results</b>         |     |                                                                                                                                                                                                              |         |                 |
| Participants           | 13* | (a) Report numbers of individuals at each stage of study—eg numbers potentially eligible, examined for eligibility, confirmed eligible, included in the study, completing follow-up, and analysed            | 9 – 10  | 310 – 328       |
|                        |     | (b) Give reasons for non-participation at each stage                                                                                                                                                         | 9 – 10  | 315 – 323       |
|                        |     | (c) Consider use of a flow diagram                                                                                                                                                                           | 9       | 315             |
| Descriptive data       | 14* | (a) Give characteristics of study participants (eg demographic, clinical, social) and information on exposures and potential confounders                                                                     | 10      | 323 – 328       |
|                        |     | (b) Indicate number of participants with missing data for each variable of interest                                                                                                                          | 10 – 11 | 323 – 345       |
|                        |     | (c) <i>Cohort study</i> —Summarise follow-up time (eg, average and total amount)                                                                                                                             | N/A     | N/A             |
| Outcome data           | 15* | <i>Cohort study</i> —Report numbers of outcome events or summary measures over time                                                                                                                          | 14 – 15 | 380 - 386       |
|                        |     | <i>Case-control study</i> —Report numbers in each exposure category, or summary measures of exposure                                                                                                         | N/A     | N/A             |
|                        |     | <i>Cross-sectional study</i> —Report numbers of outcome events or summary measures                                                                                                                           | N/A     | N/A             |
| Main results           | 16  | (a) Give unadjusted estimates and, if applicable, confounder-adjusted estimates and their precision (eg, 95% confidence interval). Make clear which confounders were adjusted for and why they were included | 10 – 15 | 331 – 386       |
|                        |     | (b) Report category boundaries when continuous variables were categorized                                                                                                                                    | 10 – 15 | 332 - 386       |
|                        |     | (c) If relevant, consider translating estimates of relative risk into absolute risk for a meaningful time period                                                                                             | N/A     | N/A             |

Continued on next page

|                          |    |                                                                                                                                                                            |         |           |
|--------------------------|----|----------------------------------------------------------------------------------------------------------------------------------------------------------------------------|---------|-----------|
| Other analyses           | 17 | Report other analyses done—eg analyses of subgroups and interactions, and sensitivity analyses                                                                             | 12 – 15 | 375 – 386 |
| <b>Discussion</b>        |    |                                                                                                                                                                            |         |           |
| Key results              | 18 | Summarise key results with reference to study objectives                                                                                                                   | 15      | 388 – 391 |
| Limitations              | 19 | Discuss limitations of the study, taking into account sources of potential bias or imprecision. Discuss both direction and magnitude of any potential bias                 | 19 – 20 | 499 – 526 |
| Interpretation           | 20 | Give a cautious overall interpretation of results considering objectives, limitations, multiplicity of analyses, results from similar studies, and other relevant evidence | 15 – 19 | 392 - 496 |
| Generalisability         | 21 | Discuss the generalisability (external validity) of the study results                                                                                                      | 20      | 527 – 530 |
| <b>Other information</b> |    |                                                                                                                                                                            |         |           |
| Funding                  | 22 | Give the source of funding and the role of the funders for the present study and, if applicable, for the original study on which the present article is based              | 21      | 552       |

\*Give information separately for cases and controls in case-control studies and, if applicable, for exposed and unexposed groups in cohort and cross-sectional studies.

**Note:** An Explanation and Elaboration article discusses each checklist item and gives methodological background and published examples of transparent reporting. The STROBE checklist is best used in conjunction with this article (freely available on the Web sites of PLoS Medicine at <http://www.plosmedicine.org/>, Annals of Internal Medicine at <http://www.annals.org/>, and Epidemiology at <http://www.epidem.com/>). Information on the STROBE Initiative is available at [www.strobe-statement.org](http://www.strobe-statement.org).

# BMJ Open

## Variation in on-scene time of emergency medical services and the extent of the difference of on-scene time between genders: A retrospective population-based registry study in Riyadh province, Saudi Arabia

|                                 |                                                                                                                                                                                                                                                                                                                                                                                                                                                                                                                                                                                                                                                                                                                                                                                                                           |
|---------------------------------|---------------------------------------------------------------------------------------------------------------------------------------------------------------------------------------------------------------------------------------------------------------------------------------------------------------------------------------------------------------------------------------------------------------------------------------------------------------------------------------------------------------------------------------------------------------------------------------------------------------------------------------------------------------------------------------------------------------------------------------------------------------------------------------------------------------------------|
| Journal:                        | <i>BMJ Open</i>                                                                                                                                                                                                                                                                                                                                                                                                                                                                                                                                                                                                                                                                                                                                                                                                           |
| Manuscript ID                   | bmjopen-2021-052481.R3                                                                                                                                                                                                                                                                                                                                                                                                                                                                                                                                                                                                                                                                                                                                                                                                    |
| Article Type:                   | Original research                                                                                                                                                                                                                                                                                                                                                                                                                                                                                                                                                                                                                                                                                                                                                                                                         |
| Date Submitted by the Author:   | 27-Jan-2022                                                                                                                                                                                                                                                                                                                                                                                                                                                                                                                                                                                                                                                                                                                                                                                                               |
| Complete List of Authors:       | Moafa, H. N.; Jazan University Faculty of Public Health and Tropical Medicine, Health Services Management ; Maastricht University Faculty of Health Medicine and Life Sciences, Health Services Research, CAPHRI School for Public Health and Primary Care<br>van Kuijk, Sander; Maastricht Universitair Medisch Centrum+, Clinical Epidemiology and Medical Technology Assessment<br>Moukhyer, M. E. ; Jazan University, Emergency Medical Services, Faculty of Applied Medical Sciences<br>Alqahtani, D. M.; Saudi Arabia Ministry of Health, Saudi Red Crescent Authority, Department of Innovation and Development<br>Haak , Harm; Maxima Medisch Centrum, Eindhoven ; Maastricht University Faculty of Health Medicine and Life Sciences, Health Services Research, CAPHRI School for Public Health and Primary Care |
| <b>Primary Subject Heading</b>: | Emergency medicine                                                                                                                                                                                                                                                                                                                                                                                                                                                                                                                                                                                                                                                                                                                                                                                                        |
| Secondary Subject Heading:      | Emergency medicine, Health services research                                                                                                                                                                                                                                                                                                                                                                                                                                                                                                                                                                                                                                                                                                                                                                              |
| Keywords:                       | ACCIDENT & EMERGENCY MEDICINE, HEALTH SERVICES ADMINISTRATION & MANAGEMENT, Health policy < HEALTH SERVICES ADMINISTRATION & MANAGEMENT, PUBLIC HEALTH                                                                                                                                                                                                                                                                                                                                                                                                                                                                                                                                                                                                                                                                    |
|                                 |                                                                                                                                                                                                                                                                                                                                                                                                                                                                                                                                                                                                                                                                                                                                                                                                                           |

SCHOLARONE™  
Manuscripts



I, the Submitting Author has the right to grant and does grant on behalf of all authors of the Work (as defined in the below author licence), an exclusive licence and/or a non-exclusive licence for contributions from authors who are: i) UK Crown employees; ii) where BMJ has agreed a CC-BY licence shall apply, and/or iii) in accordance with the terms applicable for US Federal Government officers or employees acting as part of their official duties; on a worldwide, perpetual, irrevocable, royalty-free basis to BMJ Publishing Group Ltd ("BMJ") its licensees and where the relevant Journal is co-owned by BMJ to the co-owners of the Journal, to publish the Work in this journal and any other BMJ products and to exploit all rights, as set out in our [licence](#).

The Submitting Author accepts and understands that any supply made under these terms is made by BMJ to the Submitting Author unless you are acting as an employee on behalf of your employer or a postgraduate student of an affiliated institution which is paying any applicable article publishing charge ("APC") for Open Access articles. Where the Submitting Author wishes to make the Work available on an Open Access basis (and intends to pay the relevant APC), the terms of reuse of such Open Access shall be governed by a Creative Commons licence – details of these licences and which [Creative Commons](#) licence will apply to this Work are set out in our licence referred to above.

Other than as permitted in any relevant BMJ Author's Self Archiving Policies, I confirm this Work has not been accepted for publication elsewhere, is not being considered for publication elsewhere and does not duplicate material already published. I confirm all authors consent to publication of this Work and authorise the granting of this licence.



1  
2  
3 **1 Variation in on-scene time of emergency medical services and the extent of the difference**  
4 **2 of on-scene time between genders: A retrospective population-based registry study in**  
5 **3 Riyadh province, Saudi Arabia**  
6  
7  
8

9 6 H. N. Moafa, MBBS, MPH\*<sup>1,2,3</sup>, S.M.J. van Kuijk, PhD<sup>3</sup>, M. E. Moukhyer MD, PhD<sup>4</sup>, D. M.  
10 7 Alqahtani, MIT<sup>5</sup>, H.R Haak, MD, PhD<sup>2,6,7</sup>

11 8 <sup>1</sup>Department of Health Services Management, Faculty of Public Health and Tropical  
12 9 Medicine, Jazan University, Jazan, Saudi Arabia

13 10 <sup>2</sup>Department of Health Services Research, CAPHRI School for Public Health and Primary  
14 11 Care, Maastricht University, Maastricht, The Netherlands

15 12 <sup>3</sup>Department of Clinical Epidemiology and Medical Technology Assessment, Maastricht  
16 13 University Medical Centre+, Maastricht, the Netherlands

17 14 <sup>4</sup>Department of Emergency Medical Services, Faculty of Applied Medical Sciences, Jazan  
18 15 University, Jazan, Saudi Arabia

19 16 <sup>5</sup>Department of Innovation and Development, Saudi Red Crescent Authority, Riyadh, Saudi  
20 17 Arabia

21 18 <sup>6</sup>Department of Internal Medicine, Maxima Medisch Centre, Eindhoven, The Netherlands

22 19 <sup>7</sup>Division of General Internal Medicine, Department of Internal Medicine, Maastricht  
23 20 University Medical Centre+, Maastricht, The Netherlands

24 21  
25 22 **\*Corresponding author:** H. N. Moafa.

26 23 **\*Corresponding author.** Email: h.moafa@maastrichtuniversity.nl & Mobile number:  
27 24 +31615373733 & Office number: +31433871391 & Home number: +31438552222  
28

29 25  
30 26  
31 27 **Word count:** 4762  
32  
33  
34  
35  
36  
37  
38  
39  
40

## 41 **ABSTRACT**

42 **Objective:** To identify the inter-gender variation of on-scene time (OST) for highly urgent  
43 emergency cases conveyed by Emergency Medical Services (EMS) in Saudi Arabia and to  
44 assess other predictors of OST and hypothesize for possible factors delaying OST.

45 **Design:** A retrospective population-based registry study.

46 **Setting:** Riyadh Province is the largest province in terms of population and the second in terms  
47 of geographical area.

48 **Participants:** All highly urgent transported patients from the scene to emergency departments,  
49 be they medical emergencies or trauma emergencies during 2018.

50 **Outcome measure:** OST difference between men and women transported by EMS.

51 **Results:** In total, 21,878 patients were included for analysis: 33.9% women and 66.1% men.  
52 The median OST for women was 22 minutes (interquartile range [IQR] 15 – 30) and 18 minutes  
53 (IQR 11 – 26) for men,  $p < 0.001$ ; for medical cases, median OST was 23 minutes (IQR 16 –  
54 31) for women compared to 20 minutes (IQR 13 – 29) for men,  $p < 0.001$ ; for trauma cases, the  
55 median OST of both sexes was equal. We found the following additional predictors of OST:  
56 factors of emergency type, sex, age category, geographical areas, type of ambulance vehicle,  
57 and hospital type were all significantly associated with OST in the crude or adjusted analyses.  
58 Factors of emergency type, sex, age category, geographical areas, type of ambulance vehicle,  
59 and hospital type were also significantly associated with the odds of OST of more than 15-  
60 minutes in the crude and adjusted regression analyses.

61 **Conclusion:** The median OST was longer than 15 minutes for more than half of transported  
62 cases. For medical cases, women had a longer median OST than men. Additional predictors  
63 associated with prolonged OST were the patient's age, area (i.e., urban vs. rural), type of  
64 ambulance vehicle, and season. These findings are hypothesis generating and require further  
65 studies.

### 67 **Strengths and limitations of this study**

- 68 ♦ It is the first study conducted in the Arabian Gulf States that includes a large number  
69 of highly urgent cases.
- 70 ♦ The registry relies on the Saudi Red Crescent Computerized Aid Dispatching  
71 (SRCCAD) system for automated detection of time to compute the timeline.
- 72 ♦ Using registry data has provided us with much statistical power to detect between-group  
73 differences and associations for the available characteristics.

- 1  
2  
3 74      ♦ Registry lacks other important demographic factors related to social status; education,  
4  
5 75      income, and ethnicity, which might be associated with prolonged on-scene time.  
6  
7 76      ♦ Time registered in the database depends on the information provided by emergency  
8  
9 77      medical services (EMS) providers through wireless communications with the call  
10 78      centre; hence, any network failure leads to missed data.  
11  
12 79  
13 80  
14 81  
15 82  
16 83  
17 84  
18 85  
19 86  
20 87  
21 88  
22 89  
23 90  
24 91  
25 92  
26 93  
27 94  
28 95  
29 96  
30 97  
31 98  
32 99  
33 100  
34 101  
35 102  
36 103  
37 104  
38 105  
39 106  
40 107  
41 108  
42 109  
43 110  
44 111  
45 112  
46 113  
47 114  
48 115  
49 116  
50 117  
51 118  
52 119  
53 120  
54  
55  
56  
57  
58  
59  
60

For peer review only

## 121 INTRODUCTION

122 Emergency medical services (EMS) in Saudi Arabia have been well developed during  
123 the last decade. They provide different levels of emergency care around the clock and free of  
124 charge. Women's lower EMS utilization is one of the challenges found, besides the median  
125 total EMS time for high urgent emergency cases was found to be greater than one hour.<sup>1 2</sup> The  
126 on-scene time (OST) duration may take greater than half of the total period of EMS time and  
127 made up the largest proportion of total EMS delays.<sup>3 4</sup> Long OST may lead to consequences  
128 affecting patient outcomes.<sup>5 6</sup> In certain medical circumstances, patients' transportation to a  
129 hospital as soon as possible is highly recommended.<sup>7-10</sup> In the American Heart Association  
130 (AHA) guideline for the early management of stroke patients, it is recommended that the OST  
131 should not exceed 15 minutes.<sup>7</sup>

132 The OST duration can result from the crews' decision to collect patient history and  
133 medical examination.<sup>11</sup> In addition, the period of OST varies according to the patient's status  
134 with or without mortality and geographical areas as urban or rural locations. Sex may also play  
135 a factor in OST. For example, a US study found that OST in women complaining of acute chest  
136 pain was higher than in men as the crew needed more time to apply electrocardiogram.<sup>12</sup> Other  
137 barriers often prolong OST, particularly in trauma cases, when EMS providers' accessibility to  
138 patients is difficult. These barriers can be considered inevitable causes such as waiting for the  
139 police to arrive in an incident resulting from criminal causes or waiting for the fire brigade to  
140 extract a patient from a vehicle or a building. It can also be affected in an outdoor address such  
141 as the street during a mass gathering after road traffic accidents.<sup>11 13</sup> On the other hand, it can  
142 result from patient wishes and family intervention in crews' performance and decision,  
143 especially when the crew is called to a patient's house. Such intervention is significantly  
144 affected by culture and educational level and might differ between urban and rural areas.

145 Factors related to patient culture or demography that influence OST have not been  
146 thoroughly studied in the Arabian Gulf States. A recent systematic review found that EMS  
147 crews in Saudi Arabia consider mass gathering during road traffic accidents as one of the most  
148 frequent barriers affecting their performance to work effectively and in a timely manner while  
149 the presence of the patients' families or bystanders were cited as the second salient barrier.<sup>2 14</sup>  
150 Furthermore, the median of total EMS time in the Riyadh province of Saudi Arabia for trauma  
151 cases was longer in rural areas than in urban areas, and longer than what was found in other  
152 countries such as Denmark and the US.<sup>1 15 16</sup>

153 The present study aimed to investigate OST and to identify differences between sexes  
154 regarding the amount of time spent at the scene by EMS crews. It also aims to identify other

1  
2  
3 155 patient-related factors associated with time spent at the scene for all highly urgent emergency  
4 156 cases that were transported to healthcare facilities in the Riyadh province in Saudi Arabia and  
5  
6 157 to hypothesize for possible factors delaying OST.  
7  
8  
9 158

## 10 159 **METHODS**

### 11 160 **Design**

12  
13 161 This retrospective population-based registry was conducted in the Riyadh province of Saudi  
14  
15 162 Arabia by using all EMS database records in the Saudi Red Crescent Computer Aid  
16  
17 163 Dispatching (SRCCAD) system, from January 1, 2018, to December 31, 2018. This study  
18  
19 164 complies with Strengthening the Reporting of Observational Studies in Epidemiology  
20  
21 165 (STROBE).<sup>17</sup>  
22  
23 166

### 24 167 **Setting**

25 168 Riyadh Province is in the central part of Saudi Arabia. It has a geographical size of 404,240  
26  
27 169 km<sup>2</sup>. It has an approximate population of 6,792,776 million, according to the last national  
28  
29 170 census. The province is composed of 39 different cities and Riyadh city is the capital and the  
30  
31 171 largest city in Saudi Arabia. Besides, there are hundreds of rural villages dotted between or  
32  
33 172 near these cities.<sup>18</sup> In Saudi Arabia, EMS are free of charge and can be accessed by calling the  
34  
35 173 call centre, and in certain exceptional conditions, patients can visit ambulance stations  
36  
37 174 distributed all over the province, including along highways. EMS crews of Riyadh province  
38  
39 175 are mainly composed of two Emergency Medical Technicians (EMT). They are trained on  
40  
41 176 basic life support (BLS) skills to respond to different levels of emergency cases but do not  
42  
43 177 administer medicine. However, some crews are composed of physicians and emergency  
44  
45 178 paramedics. These are called mobile intensive care units (MICU) and respond to certain highly  
46  
47 179 critical cases and provide advanced life support (ALS). A third type of EMS crew consists of  
48  
49 180 senior paramedics and are dispatched in a rapid response non-transporting vehicle (RRNTV).  
50  
51 181 These often arrive earlier to provide ALS before the essential transporting ambulances. Time  
52  
53 182 indicators are built-in SRCCAD with 20 minutes for response time and 15 minutes for OST  
54  
55 183 regardless of urgency level.

56  
57 184 Saudi EMS implements a strategy of scoop and run, which emanated from the Anglo-  
58  
59 185 American model. Most EMS chain periods are limited with a predefined time to end with the  
60  
186 golden hour of total time.<sup>19</sup> The OST comprises three consecutive periods which are access,  
187  
188 treatment, and loading time.<sup>20</sup> Access time starts from ambulance vehicles arrival to the scene  
up to crew arrival to patients' location. Treatment time is the period of patients' examination

1  
2  
3 189 and treatment. Loading time starts from moving patients on the stretcher until the crew starts  
4  
5 190 to travel to the hospital. The policy underpinning this 15-minute benchmark for OST is that  
6  
7 191 the Saudi EMS policymakers, based on the number of available crews and the volume of  
8  
9 192 patients' demands, decided that 15 minutes at the scene fit their operational procedures as a  
10  
11 193 policy target. An additional consideration was to avoid delaying ambulance resources from  
12  
13 194 becoming unavailable for new assignments.

14 195 However, when there are multiple calls for different emergencies at once, SRCCAD  
15  
16 196 may prioritize cases based on three levels of urgency and dispatch crews accordingly. Patients  
17  
18 197 or their families who have guardianship have the right to refuse transportation to hospital after  
19  
20 198 they have signed a formal paper of refusal against medical advice. However, EMS crews can  
21  
22 199 either transport patients to the closest hospitals or treat them at the scene. The study proposal  
23  
24 200 was reviewed and approved by the ethical committee in Jazan University with the registry  
25  
26 201 number: REC39/9-S085. The Ethics Committee, based on no need to contact patients, agreed  
27  
28 202 that informed consent was not required because of the anonymity of the data collected for  
29  
30 203 routine ambulance missions and the study's retrospective design. The study data take into  
31  
32 204 consideration privacy and confidentiality.

33 205

### 34 206 **Participants and public involvement**

35 207 Patients and public were not involved in developing the research question, commenting on the  
36  
37 208 database, study design, outcome measures, conduct of the study, or contributing to the writing  
38  
39 209 or editing of this study.

40 210

### 41 211 **Data collection**

42 212 The data were obtained through the operations and information department in the Riyadh  
43  
44 213 branch directorate of Saudi Red Crescent Authority (SRCA). Data were exported from  
45  
46 214 Microsoft Excel saved in an encrypted file on a hard disc and converted to an IBM SPSS file  
47  
48 215 (version 25) for further analyses.

49 216

### 50 217 **Selection of Participants**

51 218 According to the Saudi EMS definition, highly urgent emergency cases are the cases that  
52  
53 219 contacted EMS for support after exposure to serious or life-threatening illness or injuries that  
54  
55 220 require immediate medical intervention and quick transportation to hospital emergency  
56  
57 221 departments (EDs). In this study, all incoming calls for patients who were triaged at the  
58  
59 222 dispatching centre of SRCCAD as highly urgent emergency cases were included.

1  
2  
3 223 Gynaecological emergencies were excluded because of the scope of the study to compare both  
4  
5 224 sexes. In addition, we excluded records of patients for whom age, sex, or area was missing and  
6  
7 225 cases categorized by the SRCCAD as cases ended by non-conveyance. We considered the  
8  
9 226 potential source of bias; therefore, we excluded the lower extreme outliers with values equal  
10  
11 227 to zero due to system error. Records of missions dispatched for two patients or more in one  
12  
13 228 incident were excluded. Similarly, Missions that involved only Rapid Response Non-  
14  
15 229 Transporting Vehicles (RRNTV) were also removed.

16 230

### 17 231 **Methods of Measurement**

18  
19 232 We included all variables related to patient demographics and information related to  
20  
21 233 dispatching missions from the time period perspective, starting from calling the call centre and  
22  
23 234 ending with the patients' arrival to private and governmental hospitals. The EMS time intervals  
24  
25 235 are composed of 4 different periods.<sup>21</sup> First, the response time, which is the time elapsed  
26  
27 236 starting from receiving a call in the call centre and ended by the ambulance's crew's arrival to  
28  
29 237 the scene. Second, the OST, which is the time elapsed, starting from arrival to the scene and  
30  
31 238 ended by starting to travel back to EMS centre or traveling forward toward healthcare facilities.  
32  
33 239 Third, the travel time, which is the time elapsed from starting to move from the scene until the  
34  
35 240 crew's arrival to healthcare facilities. Fourth, is the hospital period, defined as the time elapsed  
36  
37 241 from arrival to the healthcare facility until handover to emergency room staff. EMS database  
38  
39 242 registry recorded all events starting from activation time and ending by crew's departure from  
40  
41 243 the hospitals in the cases where the patient had been transported or when the crew leaves the  
42  
43 244 scene when transportation had been refused. It measures only response time period and total  
44  
45 245 EMS time period in seconds. Therefore, the total EMS time in this study reflects the four  
46  
47 246 periods. We calculated the OST, travel time, hospital time according to standard EMS  
48  
49 247 definition.<sup>21</sup> Those periods in Saudi EMS have individual target indicators, such as the response  
50  
51 248 time; 20 minutes; the OST is 15 minutes, while the travel time has no indicator because of EMS  
52  
53 249 providers' and patients' safety issue arise if the time indicator too strict due to the risk of driving  
54  
55 250 too fast on the way to hospital. Saudi EMS would consider the OST if it exceeded 15 minutes  
56  
57 251 as a prolonged OST. In cases where the call centre dispatched two or more EMS crews, we  
58  
59 252 selected by calculating the actual time spent with the patient from when the first crew arrived  
60  
253 either the RRNTV or the main transporting ambulance until the patient was transported by  
254 ambulance.

255 In this study, we focused only on the EMS missions that had been registered by  
256 SRCCAD as highly urgent and ended by transporting patients into hospitals. Therefore, we

1  
2  
3 257 clustered emergency cases into two cohorts. The first cohort was the cluster of EMS mission  
4  
5 258 that were dispatched for highly urgent medical emergencies (HUME) such as acute coronary  
6  
7 259 syndrome, stroke, and out-of-hospital cardiac arrest. The second cohort was the missions  
8  
9 260 dispatched for highly urgent trauma emergencies (HUTE) such as road traffic accidents.  
10  
11 261 Demographic features available in the registry that were extracted are sex, age and  
12  
13 262 geographical area. Patients' age was divided into three categories according to Saudi Arabian  
14  
15 263 law; child: patient with an age below 15 years old, adult: patient equal to or over 15 years old  
16  
17 264 but younger than 60 years old, and elderly: patient equal to or more than 60 years old. Urban  
18  
19 265 area was defined as an area where metropolitan and micropolitan cities are located and have a  
20  
21 266 total population of equal to or more than 5000 inhabitants. On the other side, areas with less  
22  
23 267 than 5000 people or outside urban geographical area were considered rural.

24 268 We considered the differences in various EMS operational times from the data collected  
25  
26 269 in a one-year time period. In Saudi Arabia, the weekdays are considered from Sunday to  
27  
28 270 Thursday while the Friday and Saturday are the weekends. Period of the day is categorized into  
29  
30 271 two categories; office time, which is the time that starts from 8:00 AM to 4:00 PM from Sunday  
31  
32 272 to Thursday, while the home time is defined as the time that starts from 4:01 PM on the same  
33  
34 273 day up to the next day 7:59 AM side by side with 48 hours of the weekend Friday and Saturday.  
35  
36 274 Working shifts are the two daily periods that Saudi EMS schedules to provide emergency  
37  
38 275 services. It is composed of two periods: the day shift from 8:00 AM to 8:00 PM and the night  
39  
40 276 shift from 8:00 PM to 8:00 AM. We also included season. The winter season officially starts  
41  
42 277 from Mid-December to Mid-March, then the spring, which starts from Mid-March until Mid-  
43  
44 278 June. Summer starts from Mid-June to Mid-December, followed by Autumn, which starts from  
45  
46 279 Mid-September 21 and ends by Mid-December.<sup>22</sup>

47 280 Operating vehicle types represented by the three types of crews providing EMS for the  
48  
49 281 clustered emergencies were included. The first, Ambulance type II transporting vehicle (BLS-  
50  
51 282 ambulance) is the vehicle equipped by two EMT, who can perform basic life support and rapid  
52  
53 283 patient transport to hospitals. MICU is another transporting vehicle capable of highly qualified  
54  
55 284 physician-based or paramedics exposed to long-term training equal to or more than four years.  
56  
57 285 The last type of vehicle is RRNTV, which is operated in the last decade to arrive at the scene  
58  
59 286 earlier than the transporting vehicle, and it is also operated by highly experienced EMS  
60  
287 providers, often EMS paramedics. The crew of RRNTV can give ALS and do the necessary  
288 medical work to prepare the patients to be transported. Hospitals that receive emergency  
289 patients are of two types. We also included EDs based on the two types of hospitals.  
290 Governmental hospitals are non-profit healthcare organizations funded by the Saudi authorities



291 to provide health services for all Saudi citizens. Private hospitals are for-profit healthcare  
292 organizations operated by non-governmental healthcare firms for healthcare services.

293

## 294 **Statistical Analysis**

295 The median and interquartile range were computed for response time, OST, travel time,  
296 hospital time and total EMS time, and compared between men and women using the Mann-  
297 Whitney U Test. The Kruskal-Wallis and Mann-Whitney U Test were conducted to test for  
298 differences in OST based on different demographics related to patients, stratified by sex. The  
299 following factors were considered: age category, geographical area, period of requesting EMS  
300 services, season, emergency type (medical or trauma), emergency vehicles, type of hospital to  
301 which the patient was transferred.

302 To assess what variables were associated with OST, first simple linear regression was  
303 performed to identify the OST difference between different independent predictive variables.  
304 After that, multivariable linear regression was used to identify which variables were  
305 independently associated with OST.

306 Furthermore, we conducted logistic regression to assess the association between  
307 variables and the odds of an OST of more than 15 minutes based on the SRCCAD indicator.  
308 Data were presented as ORs with 95% CIs. We considered  $p < 0.05$  as statistically significant.

309

## 310 **RESULTS**

### 311 **Characteristics of study subjects**

312 During the study period, 35,944 missions of two types – transporting and non-transporting  
313 vehicles – were dispatched to the scene. RRNTV accounted for 3,397 (9.5%) missions while  
314 the transporting vehicles were 32,547 (90.5%); BLS-Ambulance 25,988 (72.3%), MICU 6,559  
315 (18.2%). Subsequently, 32,547 high emergency patients were transported to Riyadh province  
316 hospitals.

317 Figure 1 presents the flow chart of the transported patients. The study exclusion criteria  
318 of records removal shows that 443 missions records were excluded because of gynaecological  
319 emergencies, and 8,380 missions' records were removed due to missing data related to sex,  
320 age, and geographical area. Given to lower extreme outliers that were registered the OST as a  
321 zero-value due to system errors, 1,898 missions' records were excluded to avoid bias.  
322 Therefore, 24,338 missions that represented 21,878 transported patients were initially included.  
323 However, 2,460 additional records were excluded because they represented supportive  
324 RRNTV's crews who participated as logistic support side by side to BLS-ambulances crews,

325 which were the primary transporting ambulances of the patients. Subsequently, 21,878  
 326 missions of highly urgent emergency patients were included in this study. We found that 14,454  
 327 (66.1%) of cases were male. In total, 14,454 (66.1%) missions were for HUME, and 7,424  
 328 (33.9%) for HUTE. Of all, 66.5% of cases were attended at the scene by BLS-ambulances  
 329 crews, 22.3% by MICU ambulances crews, and 11.2% by two crews; 50% of them are  
 330 RRNTVs, and the remaining 50% were BLS-ambulances.

331

### 332 Main results

333 Table 1 shows time periods of ambulance service runs, including response time, OST, travel  
 334 time, and hospital time. The study showed that each duration of OST and travel time for the  
 335 HUME cohort significantly differed between men and women. The median OST of HUME for  
 336 women 23 minutes (IQR 16 – 31 minutes) was significantly longer than men 20 minutes (IQR  
 337 13 – 29 minutes),  $p < 0.001$ . The median travel time for women 19 minutes (IQR 10 – 29  
 338 minutes) was significantly longer than men 18 minutes (IQR 10 – 29 minutes),  $p < 0.001$ .

339

**Table 1** The consecutive time periods of EMS urgent missions according to the two clustered emergency cases cohorts for 21,878 transported patients.

| EMS Intervals  | Emergency Type  | Male  |                    | Female |                          |
|----------------|-----------------|-------|--------------------|--------|--------------------------|
|                |                 | No.   | Median (IQR)       | No.    | Median (SD) <sup>†</sup> |
| Response Time  | HUM Emergencies | 8,686 | 17.0 (12.5 – 23.2) | 6,912  | 17.0 (12.6 – 23.1)       |
|                | HUT Emergencies | 5,768 | 15.7 (11.2 – 22.0) | 512    | 15.6 (11.5 – 21.5)       |
| On-Scene time  | HUM Emergencies | 8,686 | 20.0 (13.0 – 29.0) | 6,912  | 23.0 (16.0 – 31.0)*      |
|                | HUT Emergencies | 5,768 | 15.0 (9.0 – 21.0)  | 512    | 15.0 (10.0 – 22.0)       |
| Travel time    | HUM Emergencies | 8,686 | 18.0 (10.0 – 29.0) | 6,912  | 19.0 (11.0 – 31.0)*      |
|                | HUT Emergencies | 5,768 | 19.0 (11.0 – 30.0) | 512    | 18.0 (12.0 – 30.0)       |
| Hospital time  | HUM Emergencies | 8,686 | 17.0 (6.0 – 27.0)  | 6,912  | 16.0 (5.0 – 27.0)        |
|                | HUT Emergencies | 5,768 | 18.0 (6.0 – 28.0)  | 512    | 17.0 (6.0 – 29.0)        |
| Total EMS Time | HUM Emergencies | 8,686 | 79.3 (63.7 – 97.1) | 6,912  | 82.8 (67.0 – 99.8)*      |
|                | HUT Emergencies | 5,768 | 73.8 (58.0 – 92.3) | 512    | 74.7 (60.8 – 91.5)       |

<sup>†</sup>Mann-Whitney U Test

\* Statistically significant difference at  $p$ -value  $< 0.05$

EMS, Emergency Medical Services; HUM, High Urgent Medical; HUT, High Urgent Trauma

340

1  
2  
3 341 Table 2 shows the median and IQR stratified by patients' demographic and background  
4  
5 342 factors for both HUTE and HUME causes. The total median OST was significantly longer for  
6  
7 343 women 22 minutes (IQR 15 – 30 minutes) than men 18 minutes (IQR 11 – 26 minutes),  $p =$   
8  
9 344 0.001. Most differences related to OST between men and women were significant, all showing  
10  
11 345 longer OST for women. In addition, all characteristics variables of patients and missions except  
12  
13 346 the daily hours, weekdays, and working shifts were statistically significant among each group  
14  
15 347 of men and women.

15 348  
16  
17 349  
18  
19 350  
20 351  
21  
22 352  
23  
24 353  
25  
26 354  
27 355  
28  
29 356  
30  
31 357  
32 358  
33  
34 359  
35  
36 360  
37  
38 361  
39 362  
40  
41 363  
42  
43 364  
44  
45 365  
46 366  
47  
48 367  
49  
50 368  
51 369  
52  
53 370  
54  
55 371  
56  
57 372  
58  
59 373  
60 374

**Table 2** Median on-scene time difference between sexes for high urgent transported patients (N=21,878).

|                         | Male          |                     | Female       |                      |
|-------------------------|---------------|---------------------|--------------|----------------------|
|                         | No. (%)       | Median (IQR) †      | No. (%)      | Median (IQR) †,‡     |
| <b>Patients (No./N)</b> | 14,454 (66.1) | 18.0 (11.0 – 26.0)  | 7,424 (33.9) | 22.0 (15.0 – 30.0)*  |
| <b>Emergency type</b>   |               |                     |              |                      |
| HUME                    | 8,686 (60.1)  | 20.0 (13.0 – 29.0)* | 6,912 (93.1) | 23.0 (16.0 – 31.0)** |
| HUTE                    | 5,768 (39.9)  | 15.0 (9.0 – 21.0)*  | 512 (6.9)    | 15.0 (10.0 – 22.0)*  |
| <b>Age Category</b>     |               |                     |              |                      |
| Child <15               | 550 (3.8)     | 14.5 (9.0 – 22.0)*  | 267 (3.6)    | 18.0 (11.0 – 25.0)** |
| Adult 15–<60            | 9,803 (67.8)  | 16.0 (10.0 – 24.0)* | 3,299 (44.4) | 21.0 (14.0 – 29.0)** |
| Elderly ≥60             | 4,101 (28.4)  | 22.0 (15.0 – 30.0)* | 3,858 (52.0) | 23.0 (17.0 – 31.0)** |
| <b>Scene location</b>   |               |                     |              |                      |
| Urban                   | 13,562 (93.8) | 18.0 (12.0 – 26.0)* | 7,238 (97.5) | 22.0 (16.0 – 30.0)** |
| Rural                   | 892 (6.2)     | 11.0 (6.0 – 19.0)*  | 186 (2.5)    | 15.0 (9.0 – 21.0)**  |
| <b>Daily hours</b>      |               |                     |              |                      |
| Home time               | 10,901 (75.4) | 18.0 (11.0 – 26.0)  | 5,433 (73.2) | 22.0 (15.0 – 30.0)*  |
| office time             | 3,553 (24.6)  | 18.0 (11.0 – 26.0)  | 1,991 (26.8) | 22.0 (15.0 – 30.0)*  |
| <b>Week days</b>        |               |                     |              |                      |
| Sun-Thursday            | 10,300 (71.3) | 18.0 (11.0 – 26.0)  | 5,333 (71.8) | 22.0 (15.0 – 30.0)*  |
| Weekend                 | 4,152 (28.7)  | 18.0 (11.0 – 26.0)  | 2,091 (28.2) | 22.0 (15.0 – 30.0)*  |
| <b>Working shift</b>    |               |                     |              |                      |
| Day shift               | 6,770 (46.8)  | 18.0 (11.0 – 26.0)  | 3,652 (49.2) | 22.0 (15.0 – 30.0)*  |
| Night shift             | 7,684 (53.2)  | 18.0 (11.0 – 26.0)  | 3,772 (50.8) | 22.0 (15.0 – 30.0)*  |
| <b>Season</b>           |               |                     |              |                      |
| Winter                  | 3,512 (24.3)  | 19.0 (12.0 – 27.0)* | 1,901 (25.6) | 23.0 (16.0 – 31.0)** |
| Spring                  | 3,583 (24.8)  | 18.0 (11.0 – 26.0)* | 1,756 (23.7) | 22.0 (15.0 – 30.0)** |
| Summer                  | 3,573 (24.7)  | 17.0 (11.0 – 25.0)* | 1,771 (23.9) | 22.0 (15.0 – 30.0)** |
| Autumn                  | 3,786 (26.2)  | 18.0 (12.0 – 25.0)* | 1,996 (26.9) | 22.0 (15.0 – 29.0)** |
| <b>Vehicle types</b>    |               |                     |              |                      |
| BLS                     | 9,722 (67.3)  | 17.0 (10.0 – 24.0)* | 4,817 (64.9) | 21.0 (14.0 – 29.0)** |
| MICU                    | 3,204 (22.2)  | 20.0 (13.0 – 28.0)* | 1,675 (22.6) | 24.0 (17.0 – 31.0)** |
| Two crews§              | 1,528 (10.6)  | 22.0 (16.0 – 30.0)* | 932 (12.6)   | 25.0 (19.0 – 33.0)** |
| <b>Receiving EDs</b>    |               |                     |              |                      |
| Governmental            | 14,391¶       |                     | 7,402♦       |                      |
| Private                 | 12,165 (84.2) | 18.0 (11.0 – 26.0)* | 6,271 (84.5) | 22.0 (15.0 – 30.0)** |
|                         | 2,226 (15.4)  | 19.0 (13.0 – 28.0)* | 1,131 (15.2) | 23.0 (17.0 – 31.0)** |

† KRUSKAL\_WALLIS. ‡Mann-Whitney Test. §Missions attended by rapid response non-transporting vehicles and the essential transporting vehicle. ¶63 removed because of undocumented hospital. ♦22 removed because of undocumented hospital. \*Statistically significance at p-value <0.05 between groups. \*\*Statistically significance at p-value <0.05 within group. \*\*\*Statistically significance at p-value <0.05 within group and between groups. BLS, Basic Life Support; EDs, Emergency Departments; HUME, High Urgent Medical Emergencies; HUTE, High Urgent Trauma Emergencies; MICU, Mobile Intensive Care Unit.

375

376 Table 3 illustrates the association between different variables and OST. Emergency

377 type, sex, age category, geographical areas, types of vehicles, and hospital type were all

378 significantly associated with OST in the crude, or adjusted analyses. When adjusted for other  
 379 variables, all besides working hours were retained in the model.

**Table 3** Simple linear and multivariable linear regression of on-scene time according to different predictors (N=21,878).

| Predictors' variable             | No. (%)       | Crude Regression Coefficient (95% CI) | Adjusted Regression Coefficient (95% CI) |
|----------------------------------|---------------|---------------------------------------|------------------------------------------|
| <b>Emergency type</b>            |               |                                       |                                          |
| HUME (ref) %(n/N)                | 15,598 (71.3) |                                       |                                          |
| HUTE                             | 6,280 (28.7)  | -6.5 (-6.9 – -6.1)*                   | -4.2 (-4.6 – -3.8)*                      |
| <b>Sex</b>                       |               |                                       |                                          |
| Male (ref) %(n/N)                | 14,454 (66.1) |                                       |                                          |
| Female                           | 7,424 (33.9)  | 3.9 (3.6 – 4.3)*                      | 1.8 (1.5 – 2.2)*                         |
| <b>Age category</b>              |               |                                       |                                          |
| Adult (ref) %(n/N)               | 13,102 (59.9) |                                       |                                          |
| Child (<15)                      | 817 (3.7)     | -1.5 (-2.4 – -0.5)*                   | -2.3 (-3.2 – -1.4)*                      |
| Elderly (≥60)                    | 7,959 (36.4)  | 4.7 (4.3 – 5.1)*                      | 2.1 (1.7 – 2.5)*                         |
| <b>Scene location</b>            |               |                                       |                                          |
| Urban (ref) %(n/N)               | 20,800 (95.1) |                                       |                                          |
| Rural                            | 1,078 (4.9)   | -5.5 (-6.3 – -4.7)*                   | -2.6 (-3.4 – -1.8)*                      |
| <b>Daily hours</b>               |               |                                       |                                          |
| Home time (ref) %(n/N)           | 16,334 (74.7) |                                       |                                          |
| Office time                      | 5,544 (25.3)  | 0.5 (0.15 – 0.95)*                    | 0.4 (-0.1 – 1.0)                         |
| <b>Seven days</b>                |               |                                       |                                          |
| Weekdays (ref) %(n/N)            | 15,633 (71.5) |                                       |                                          |
| Weekend                          | 6,245 (28.5)  | -0.2 (-0.4 – 0.4)                     | 0.2 (-0.2 – 0.6)                         |
| <b>Working shift</b>             |               |                                       |                                          |
| Day shift (ref) %(n/N)           | 10,422 (47.6) |                                       |                                          |
| Night shift                      | 11,456 (52.4) | -0.5 (-0.84 – -0.14)*                 | -0.1 (-0.5 – 0.3)                        |
| <b>Season</b>                    |               |                                       |                                          |
| Summer (ref) %(n/N)              | 5,344 (24.4)  |                                       |                                          |
| Winter                           | 5,413 (24.8)  | 1.4 (0.9 – 1.9)*                      | 0.8 (0.3 – 1.2)*                         |
| Spring                           | 5,339 (24.4)  | 0.3 (-0.2 – 0.8)                      | 0.1 (-0.3 – 0.6)                         |
| Autumn                           | 5,782 (26.4)  | 0.2 (0.3 – 0.6)                       | -0.2 (-0.7 – 0.3)                        |
| <b>Ambulance vehicle</b>         |               |                                       |                                          |
| BLS (ref) %(n/N)                 | 14,539 (66.5) |                                       |                                          |
| MICU                             | 4,879 (22.3)  | 2.8 (2.3 – 3.2)*                      | 2.3 (1.9 – 2.7)*                         |
| Two Crews <sup>†</sup>           | 2,460 (11.2)  | 4.9 (4.4 – 5.5)*                      | 3.7 (3.2 – 4.3)*                         |
| <b>Receiving EDs<sup>‡</sup></b> |               |                                       |                                          |
| Governmental (ref)%(n/N)         | 18,436 (84.6) |                                       |                                          |
| Private                          | 3,357 (15.4)  | 1.6 (1.1 – 2.0)*                      | 0.9 (0.5 – 1.4)*                         |

<sup>†</sup> Missions attended by rapid response non-transporting vehicles and the essential transporting vehicle. <sup>‡</sup> 85 records of undocumented hospitals were removed and not counted. \*Statistically significance at p-value <0.05.

BLS, Basic Life Support; EDs, Emergency Departments; HUME, High Urgent Medical Emergencies; HUTE, High Urgent Trauma Emergencies; MICU, Mobile Intensive Care Unit.

380

381 We found that 59.4% of men had an OST of more than 15 minutes compared to 75%  
 382 for women ( $p < 0.001$ ). Table 4 shows the findings of the crude and adjusted logistic regression  
 383 models. Emergency type, sex, age category, geographical areas, types of vehicles, and hospitals  
 384 type were all significantly associated with the odds of OST of more than 15 minutes, both in  
 385 crude and adjusted models.

386

**Table 4** Association of predictor variable and on-scene time longer than 15 minutes  
 (N=21,878)

| Predictive variable              | No. (%)       | Crude Odds Ratio (95% CI) | Adjusted Odds Ratio (95% CI) |
|----------------------------------|---------------|---------------------------|------------------------------|
| <b>Emergency type</b>            |               |                           |                              |
| HUME (ref) %(n/N)                | 15,598 (71.3) |                           |                              |
| HUTE                             | 6,280 (28.7)  | 0.3 (0.3 – 0.4)*          | 0.5 (0.47 – 0.55)*           |
| <b>Sex</b>                       |               |                           |                              |
| Male (ref) %(n/N)                | 14,454 (66.1) |                           |                              |
| Female                           | 7,424 (33.9)  | 2.0 (1.9 – 2.2)*          | 1.4 (1.3 – 1.5)*             |
| <b>Age Category</b>              |               |                           |                              |
| Adult (ref) %(n/N)               | 13,102 (59.9) |                           |                              |
| Child (<15)                      | 817 (3.7)     | 0.72 (0.63 – 0.83)*       | 0.61 (0.5 – 0.7)*            |
| Elderly ( $\geq 60$ )            | 7,959 (36.4)  | 2.5 (2.4 – 2.70)*         | 1.7 (1.6 – 1.8)*             |
| <b>Scene location</b>            |               |                           |                              |
| Urban (ref) %(n/N)               | 20,800 (95.1) |                           |                              |
| Rural                            | 1,078 (4.9)   | 0.3 (0.3 – 0.3)*          | 0.5 (0.4 – 0.6)*             |
| <b>Daily hours</b>               |               |                           |                              |
| Home time (ref) %(n/N)           | 16,334 (74.7) |                           |                              |
| Office time                      | 5,544 (25.3)  | 1.05 (1.0 – 1.1)          | 1.0 (0.9 – 1.1)              |
| <b>Seven days</b>                |               |                           |                              |
| Weekdays (ref) %(n/N)            | 15,633 (71.5) |                           |                              |
| Weekend                          | 6,245 (28.50) | 1.0 (0.9 – 1.0)           | 1.0 (0.9 – 1.0)              |
| <b>Working shift</b>             |               |                           |                              |
| Day shift (ref) %(n/N)           | 10,422 (47.6) |                           |                              |
| Night shift                      | 11,456 (52.4) | 1.0 (0.9 – 1.0)           | 1.0 (0.9 – 1.1)              |
| <b>Season</b>                    |               |                           |                              |
| Summer (ref) % (n/N)             | 5,344 (24.4)  |                           |                              |
| Winter                           | 5,413 (24.8)  | 1.2 (1.1 – 1.3)*          | 1.1 (1.0 – 1.2)*             |
| Spring                           | 5,339 (24.4)  | 1.0 (1.0 – 1.1)           | 1.0 (0.9 – 1.1)              |
| Autumn                           | 5,782 (26.4)  | 1.0 (1.0 – 1.1)           | 1.0 (0.9 – 1.1)              |
| <b>Ambulance vehicle</b>         |               |                           |                              |
| BLS (ref)%(n/N)                  | 14,539 (66.5) |                           |                              |
| MICU                             | 4,879 (22.3)  | 1.7 (1.6 – 1.8)*          | 1.5 (1.4 – 1.7)*             |
| Two Crews <sup>†</sup>           | 2,460 (11.2)  | 2.7 (2.5 – 3.0)*          | 2.2 (2.0 – 2.5)*             |
| <b>Receiving EDs<sup>‡</sup></b> |               |                           |                              |
| Governmental (ref)%(n/N)         | 18,436 (84.6) |                           |                              |
| Private Hospital                 | 3,357 (15.4)  | 1.5 (1.4 – 1.6)*          | 1.3 (1.2 – 1.5)*             |

<sup>†</sup> Missions attended by rapid response non-transporting vehicles and the essential transporting vehicle. <sup>‡</sup> 85 records of undocumented hospitals' EDs were removed and not counted. \*Statistically significance at  $p$ -value  $< 0.05$ .

BLS, Basic Life Support; EDs, Emergency Departments; HUME, High Urgent Medical Emergencies; HUTE, High Urgent Trauma Emergencies; MICU, Mobile Intensive Care Unit.

## 387 DISCUSSION

388 The present study showed that more than 50% of emergency cases had an OST of greater than  
389 15 minutes, which is the Saudi EMS standard time for all crews to perform the standard  
390 operational procedures during OST regardless of urgency level. Although the median OST for  
391 HUTE was closer than HUME to the benchmark of 15 minutes, about 25% of those missions  
392 still took more than 22 minutes. OST was also prolonged when EMS ambulances missions  
393 were dispatched for women, the elderly, in urban areas, during winter, as advanced EMS  
394 services, or for transport to private hospitals. Several studies demonstrated that an increase in  
395 OST was associated with adverse outcome.<sup>3 5 23-26</sup> In addition, the American Stroke Association  
396 guideline recommends OST to be  $\leq 15$  minutes.<sup>7</sup>

397 Children represented 3.7% of EMS missions and had significantly shorter OST. Our  
398 study is consistent with multiple studies that found children's OST to be significantly shorter  
399 than adults.<sup>27 28</sup> In our study, elderly patients had by far the longest median OST. Cultural  
400 restrictions of face coverage for elderly females reduce with an increase in age. Elderly people  
401 of both sexes in Saudi Arabia most ordinarily live on the first floor due to comorbidities and  
402 difficulties climbing up to the upper floors. In our study, although the median OST for elderly  
403 people was longer than adults and children, the inter-gender variation in the OST duration for  
404 elderly people was negligible compared to adults and children. A plausible explanation for  
405 prolonged OST for the elderly might be attributed to the difficulty in communication with them  
406 about the severity of their medical conditions and that more time was required to stabilize  
407 them.<sup>29</sup> A Swedish study found that an increase in age is directly proportional to an increase in  
408 OST.<sup>30</sup> Sullivan et al. found oldest people are significantly associated with longer OST.<sup>31</sup>  
409 However, in another study, no association between age and sex and prolonged OST was  
410 found.<sup>32</sup>

411 Although EMS crews had spent more than 15 minutes for most patients at the scene  
412 before they transported them to hospitals, women were most likely to have longer time than

1  
2  
3 413 men regardless of any explanatory factor. For example, in looking at EMS crew types, we  
4  
5 414 found EMS missions that were dispatched by MICU crews had longer OST than BLS crews,  
6  
7 415 and the dispatching of MICU crews increased the odds of prolonged OST regardless of the  
8  
9 416 patients' gender. This finding is line with Schull et al. who found dispatching ALS crews  
10  
11 417 compared to the BLS crews at the scene increase the OST by 5.6 minutes.<sup>33</sup> Yet, we found that  
12  
13 418 the median OST for MICU crews was longer for women than men, although, our data did not  
14  
15 419 include the type and number of interventions at the scene. Our study revealed EMS crews  
16  
17 420 staying a half-hour or more at the scene for 25 % of adult women regardless of the calls'  
18  
19 421 reasons. We compared this finding with their counterpart of adult men, and we found the  
20  
21 422 difference was at a minimum 5 minutes. Given the unavailable data elucidating number and  
22  
23 423 type of medical interventions at the scene, we are unable to clarify the medical reasons  
24  
25 424 triggering this difference. Moreover, our study data cannot reveal whether women could  
26  
27 425 receive less or more intervention than men at the scene. For example, studies in the US showed  
28  
29 426 women had received less EMS interventions and treatment compared to men.<sup>34 35</sup> Although we  
30  
31 427 look for explanations in Saudi EMS setting, the gender differences are not confined to our  
32  
33 428 study. Our findings are in line with several studies from other countries often found that women  
34  
35 429 had a longer median or average OST compared to men.<sup>12 28 29 31 33 34</sup> None of these studies  
36  
37 430 investigated the impact of different sociocultural factors on spent time at the scene for patients.  
38  
39 431 One of these found that women had more extended OST than men for non-ST-elevation  
40  
41 432 myocardial infarction and ST-elevation myocardial infarction, despite ECG being  
42  
43 433 implemented for both men and women.<sup>12</sup>

44  
45 434 In our study, OST and total EMS time for HUME were longer for women than men,  
46  
47 435 while missions dispatched to HUTE did not show any difference. HUME missions may be  
48  
49 436 more often for patients in household buildings than to HUTE missions that may be dispatched  
50  
51 437 more often to open areas such as streets (e.g., for vehicle accidents). Most of HUTE are  
52  
53  
54  
55  
56  
57  
58  
59  
60



1  
2  
3 438 involved by third parties like the Saudi Police which limit any cultural barriers. While in  
4  
5 439 HUME, the profound sex difference in median OST in HUME missions might primarily be  
6  
7  
8 440 explained by Saudi house design and culture. It is customary in Saudi Arabia for the upper  
9  
10 441 floors and rooms far from the residential home's main entrance to be a suitable residence for  
11  
12 442 women. It has been proven that house design has an impact on delaying the access time to the  
13  
14 443 patient after crew arrival to the scene.<sup>36 37</sup> Saudi houses are relatively large due to the high  
15  
16 444 average number of family members.<sup>38</sup> When EMS crews arrive at the scene, they must usually  
17  
18 445 walk a longer distance to reach the female-patient locations. Moreover, cultural differences in  
19  
20 446 Saudi Arabia require women to be fully covered at the presence of non-primary relative male  
21  
22 447 such the EMS all-males crews and that is why it might take a considerable time before the crew  
23  
24 448 are allowed access to the patient.

25  
26  
27  
28 449 Another possible reason for the delay during the scene period for Saudi women is the  
29  
30 450 loading process into ambulance vehicles by all-male crews. This process would require strict  
31  
32 451 adherence by crews' members to use the ambulance stretchers even if the patient can walk  
33  
34 452 independently or with crew members' support. While for Saudi men, the stretcher could be  
35  
36 453 waived if the patient prefers walking without it. However, to the best of our knowledge, no  
37  
38 454 previous study has investigated the influence of culture and home design and whether they  
39  
40 455 have a role in prolonging the OST duration for men or women. Thus, further research on this  
41  
42 456 topic is warranted.

43  
44  
45  
46  
47 457 In Saudi culture, men are usually involved in decision-making related to the  
48  
49 458 transportation of children and elderly of both sexes, and women of all ages. Some Saudi women  
50  
51 459 demand that their primary male relative is present to discuss their health status and plan further  
52  
53 460 action. Some still need guardianship for signing the consent for medical intervention, although  
54  
55 461 they have the right to sign it themselves.<sup>39 40</sup> In specific circumstances, the women's guardian  
56  
57 462 can prohibit them from transportation to the hospital by ambulance.<sup>41</sup> A Saudi study found that  
58  
59  
60

1  
2  
3 463 Saudi women had lower health literacy than men.<sup>42</sup> Two other Saudi studies revealed that  
4  
5 464 Saudi women were less likely to use EMS and were more likely to refuse transportation by  
6  
7  
8 465 ambulance than men.<sup>143</sup> Therefore, the longer OST among women might be explained by their  
9  
10 466 reluctance to be transported and that the ambulance crew spent more time to educate them and  
11  
12 467 their guardians about the importance of ambulance transportation. Further qualitative research  
13  
14 468 may be needed to identify factors that lead to prolonged OST at households. This study lacks  
15  
16  
17 469 the data necessary to do so. No previous narrative inquiry has been performed to study this  
18  
19 470 phenomenon in Saudi Arabia. An Australian qualitative study investigated the barriers  
20  
21 471 confronting paramedics because of cultural barriers of middle eastern people living in Australia  
22  
23 472 who might have a cultural resemblance to Saudi people.<sup>44</sup> The informants' paramedics stated  
24  
25 473 that they found difficulties in providing care due to specific norms and behaviour emanating  
26  
27  
28 474 from middle east culture, and time management at the home locations was affected.<sup>44</sup>

30  
31 475 A significant delay on the scene can deprive women of receiving important medical  
32  
33 476 intervention, unable to be provided by the ambulance crew, in a timely manner in definitive  
34  
35 477 care especially in life-threatening cases. Due to the longer OST for women, they are more  
36  
37 478 exposed to unexpected adverse events such as late or unsafe arrival to hospitals, especially  
38  
39 479 when the crews are committed to not exceeding the golden hour, the benchmark related to the  
40  
41  
42 480 total EMS time, and risk road accidents themselves.

43  
44  
45 481

### 46 47 482 **Strengths and limitations**

48  
49 483 Our study as a retrospective study has several limitations, all pertaining to the EMS registry.  
50  
51 484 The registry relies on the SRCCAD automated detection of time to compute the timeline.  
52  
53 485 However, one-fourth of data were missing, and we observed impossible outliers that may have  
54  
55 486 arisen due to network failure during the communication between call centre and crews at the  
56  
57  
58 487 scene. Our exclusion of those missing data and outliers might have induced selection bias.  
59  
60

1  
2  
3 488 Another limitation is the non-availability of variables that may explain the gender differences  
4  
5 489 in more details, such as socioeconomic characteristics, time between onset of symptoms and  
6  
7 490 EMS call, type of treatment at the scene, and OST stratified by its four phases: arrival at the  
8  
9 491 scene until accessing the patient, patient assessment time, treatment phase, and loading time.  
10  
11 492 On the other hand, using registry data has provided us with much statistical power to detect  
12  
13 493 between-group differences and associations for the characteristics that were available.  
14  
15

16  
17 494 Perceived urgency and severity rely on the call centre's triaging system and additional  
18  
19 495 confirmation by crews during arrival at the scene, which might not reflect the real patient  
20  
21 496 condition when the patients arrive at the hospital. Therefore, some misclassification in the  
22  
23 497 urgency types may have occurred. However, our data do reflect daily practices in which  
24  
25 498 urgency levels are determined as early during the mission as possible. However, with future  
26  
27 499 involvement in the EMS data set, researchers could explain those reasonable and unavoidable  
28  
29 500 causes that lead to the lateness.  
30  
31

32  
33 501 Considering the linking of the registry data to outcomes data on patients' receiving  
34  
35 502 hospital data such as mortality, 28-day survival, and 6-month survival, we showed OST  
36  
37 503 statistical significance between sexes but limited to show the clinical significance. The last  
38  
39 504 limitation belongs to the study design of clustering heterogeneous emergency types into two  
40  
41 505 cohorts and the Saudi benchmarks of 15-minutes. As a result, our study cannot compare our  
42  
43 506 finding of OST with the essential international guideline like AHA of the recommended OST  
44  
45 507 for specific emergency cases like out-of-hospital cardiac arrest, acute coronary syndrome, and  
46  
47 508 stroke. However, our study showed that female time to access definitive care during medical  
48  
49 509 emergencies is more extended. With future involvement in the EMS data set, researchers could  
50  
51 510 explain the relationship between time performance and EMS outcomes.  
52  
53

54  
55 511 Finally, our study's generalizability might apply to urban and rural areas of other  
56  
57 512 different Saudi provinces and the other Arabian Gulf States having similar EMS systems except  
58  
59  
60

1  
2  
3 513 for Macca city in Saudi Arabia because of Hajj and the influx of Muslims gathering during  
4  
5 514 different seasons.  
6  
7  
8 515

9  
10 516 **CONCLUSIONS**  
11

12 517 This study shows that median OST was longer than 15 minutes for more than half of  
13  
14 518 transported cases. In addition, it was longer for women for HUME at every time and place,  
15  
16 519 regardless of age category, crew type, and receiving hospital. For those EMS missions that had  
17  
18 520 been dispatched for HUTE, there was no difference. Furthermore, missions to children, in rural  
19  
20 521 areas, for trauma patients, for crews dispatched by BLS-ambulances, in summer as a season,  
21  
22 522 or transported to EDs of governmental hospitals were all significant predictors for shorter OST.  
23  
24 523 These findings are hypothesis generating and require further studies.  
25  
26  
27  
28 524

29 525 **Authors' Contribution:** All authors conceived the study, conceptualize the ideas, supervised  
30  
31 526 the study design and definition of essential terms and study measures. H.N.M, S.M.J.V.K, and  
32  
33 527 DMA performed the data cleaning, management, and analysis. H.N.M was the formal analysis,  
34  
35 528 and S.M.J.V.K provided statistical advice on study design and analysis. H.N.M and DMA had  
36  
37 529 full access to all of the data in the study. H.N.M takes responsibility for the integrity of the data  
38  
39 530 and the accuracy of data analysis. H.N.M, S.M.J.V.K, M.E.M, and H.R.H interpreted the data.  
40  
41 531 H.N.M and H.R.H were the project administrators. H.R.H was the primary supervisor. H.N.M  
42  
43 532 drafted the manuscript, and all authors contributed substantially to its revision. H.N.M takes  
44  
45 533 responsibility for the paper as a whole.  
46

47 534  
48 535 **Acknowledgement:** The authors would like to thank Ms. Jordan Phillips from Berlitz  
49  
50 536 Language Centre Maastricht The Netherlands for her proofreading of the manuscript.  
51

52 537  
53 538 **Conflicts of interest:** no conflicts.  
54

55 539  
56 540 **Funding and support:** None.  
57

58 541  
59 542 **Ethics approval:** The study proposal was reviewed and approved by the ethical committee  
60 543 in Jazan University with the registry number: REC39/9-S085.

1  
2  
3 544  
4 545 **Data availability statement:** Data are available upon reasonable request.  
5 546  
6 547  
7 548

8 549 Reference:

- 9 550  
10 551  
11 552  
12 553  
13 554  
14 555  
15 556  
16 557  
17 558  
18 559  
19 560  
20 561  
21 562  
22 563  
23 564  
24 565  
25 566  
26 567  
27 568  
28 569  
29 570  
30 571  
31 572  
32 573  
33 574  
34 575  
35 576  
36 577  
37 578  
38 579  
39 580  
40 581  
41 582  
42 583  
43 584  
44 585  
45 586  
46 587  
47 588  
48 589  
49  
50  
51  
52  
53  
54  
55  
56  
57  
58  
59  
60
1. Moafa HN, van Kuijk SMJ, Alqahtani DM, et al. Disparities between Rural and Urban Areas of the Central Region of Saudi Arabia in the Utilization and Time-Centeredness of Emergency Medical Services. *International Journal of Environmental Research and Public Health* 2020;17(21):7944. doi: 10.3390/ijerph17217944
  2. Moafa HN, Kuijk SMJv, Franssen GHLM, et al. What is known about the quality of out-of-hospital emergency medical services in the Arabian Gulf States? A systematic review. *PLOS ONE* 2019;14(12):e0226230. doi: 10.1371/journal.pone.0226230
  3. Brown JB, Rosengart MR, Forsythe RM, et al. Not all prehospital time is equal: Influence of scene time on mortality. *The journal of trauma and acute care surgery* 2016;81(1):93-100. doi: 10.1097/TA.0000000000000999
  4. Alrawashdeh A, Nehme Z, Williams B, et al. Emergency medical service delays in ST-elevation myocardial infarction: a meta-analysis. *Heart (British Cardiac Society)* 2020;106(5):365-73. doi: 10.1136/heartjnl-2019-315034
  5. Ruelas OS, Tschautscher CF, Lohse CM, et al. Analysis of Prehospital Scene Times and Interventions on Mortality Outcomes in a National Cohort of Penetrating and Blunt Trauma Patients. *Prehospital Emergency Care* 2018;22(6):691-97. doi: 10.1080/10903127.2018.1448494
  6. Seamon MJ, Fisher CA, Gaughan J, et al. Prehospital procedures before emergency department thoracotomy: "scoop and run" saves lives. *The Journal of trauma* 2007;63(1):113-20. doi: 10.1097/TA.0b013e31806842a1
  7. Jauch EC, Saver JL, Adams HP, et al. Guidelines for the Early Management of Patients With Acute Ischemic Stroke. *Stroke* 2013;44(3):870-947. doi: 10.1161/STR.0b013e318284056a
  8. Campbell BCV, De Silva DA, Macleod MR, et al. Ischaemic stroke. *Nature Reviews Disease Primers* 2019;5(1):70. doi: 10.1038/s41572-019-0118-8
  9. Lockey DJ, Weaver AE, Davies GE. Practical translation of hemorrhage control techniques to the civilian trauma scene. *Transfusion* 2013;53 Suppl 1:17s-22s. doi: 10.1111/trf.12031 [published Online First: 2013/01/18]
  10. Salomone JP, Ustin JS, McSwain NE, Jr., et al. Opinions of trauma practitioners regarding prehospital interventions for critically injured patients. *The Journal of trauma* 2005;58(3):509-15. doi: 10.1097/01.TA.0000152807.63559.2E
  11. Vincent-Lambert C, Mottershaw T. Views of emergency care providers about factors that extend on-scene time intervals. *African journal of emergency medicine* 2018;8(1):1-5. doi: 10.1016/j.afjem.2017.08.003
  12. Aguilar SA, Patel M, Castillo E, et al. Gender differences in scene time, transport time, and total scene to hospital arrival time determined by the use of a prehospital electrocardiogram in patients with complaint of chest pain. *The Journal of emergency medicine* 2012;43(2):291-7. doi: 10.1016/j.jemermed.2011.06.130 [published Online First: 2012/02/14]

- 1  
2  
3 590 13. Luo W, Yao J, Mitchell R, et al. Spatiotemporal access to emergency medical services in  
4 591 Wuhan, China: accounting for scene and transport time intervals. *International*  
5 592 *Journal of Health Geographics* 2020;19(1):52. doi: 10.1186/s12942-020-00249-7  
6  
7 593 14. Alanazi AF. Emergency medical services in Saudi Arabia: A study on the significance of  
8 594 paramedics and their experiences on barriers as inhibitors of their efficiency. *Int J*  
9 595 *Appl Basic Med Res* 2012;2(1):34-37. doi: 10.4103/2229-516X.96803  
10  
11 596 15. Mell HK, Mumma SN, Hiestand B, et al. Emergency Medical Services Response Times in  
12 597 Rural, Suburban, and Urban Areas. *JAMA surgery* 2017;152(10):983-84. doi:  
13 598 10.1001/jamasurg.2017.2230 [published Online First: 2017/07/21]  
14  
15 599 16. Mills EHA, Aasbjerg K, Hansen SM, et al. Prehospital time and mortality in patients  
16 600 requiring a highest priority emergency medical response: a Danish registry-based  
17 601 cohort study. *BMJ Open* 2019;9(11):e023049. doi: 10.1136/bmjopen-2018-023049  
18 602 17. von Elm E, Altman DG, Egger M, et al. The Strengthening the Reporting of Observational  
19 603 Studies in Epidemiology (STROBE) statement: guidelines for reporting observational  
20 604 studies. *Journal of clinical epidemiology* 2008;61(4):344-9. doi:  
21 605 10.1016/j.jclinepi.2007.11.008  
22  
23 606 18. The General Authority for Statistics in Saudi Arabia. Saudi arabian census report for 2010  
24 607 Saudi Arabia: The General Authority for Statistics in Saudi Arabia.; 2021 [194].  
25 608 Available from: <https://www.stats.gov.sa/en/73> accessed March 15, 2021.  
26 609 19. Lerner EB, Moscati RM. The Golden Hour: Scientific Fact or Medical "Urban Legend"?  
27 610 *Academic Emergency Medicine* 2001;8(7):758-60. doi: 10.1111/j.1553-  
28 611 2712.2001.tb00201.x  
29  
30 612 20. Meislin HW, Conn JB, Conroy C, et al. Emergency medical service agency definitions of  
31 613 response intervals. *Annals of Emergency Medicine* 1999;34(4, Part 1):453-58. doi:  
32 614 10.1016/S0196-0644(99)80046-8  
33  
34 615 21. Spaite DW, Valenzuela TD, Meislin HW, et al. Prospective validation of a new model for  
35 616 evaluating emergency medical services systems by in-field observation of specific  
36 617 time intervals in prehospital care. *Annals of Emergency Medicine* 1993;22(4):638-45.  
37 618 doi: 10.1016/S0196-0644(05)81840-2  
38  
39 619 22. Saudi Tourism Authority. The seasons and climate in Saudi Arabia Riyadh, Saudi Arabia:  
40 620 Saudi Tourism Authority; 2021 [Available from:  
41 621 [https://www.visitsaudi.com/en/understand/climate-and-](https://www.visitsaudi.com/en/understand/climate-and-seasons#:~:text=Contrary%20to%20popular%20belief%2C%20it's,overview%20of%20the%20kingdom's%20weather.March15)  
42 622 [seasons#:~:text=Contrary%20to%20popular%20belief%2C%20it's,overview%20of%20the%20kingdom's%20weather.March15](https://www.visitsaudi.com/en/understand/climate-and-seasons#:~:text=Contrary%20to%20popular%20belief%2C%20it's,overview%20of%20the%20kingdom's%20weather.March15), 2021.  
43 623  
44 624 23. Johnson NJ, Carr BG, Salhi R, et al. Characteristics and outcomes of injured patients  
45 625 presenting by private vehicle in a state trauma system. *The American journal of*  
46 626 *emergency medicine* 2013;31(2):275-81. doi: 10.1016/j.ajem.2012.07.023  
47  
48 627 24. McCoy CE, Menchine M, Sampson S, et al. Emergency medical services out-of-hospital  
49 628 scene and transport times and their association with mortality in trauma patients  
50 629 presenting to an urban Level I trauma center. *Annals of emergency medicine*  
51 630 2013;61(2):167-74. doi: 10.1016/j.annemergmed.2012.08.026  
52  
53 631 25. Hang AP, Ki Ok A, Eui Jung L, et al. Association between Survival and Time of On-Scene  
54 632 Resuscitation in Refractory Out-of-Hospital Cardiac Arrest: A Cross-Sectional  
55 633 Retrospective Study. *International Journal of Environmental Research and Public*  
56 634 *Health*; 18(496).  
57  
58 635 26. Poppe M, Krammel M, Clodi C, et al. Management of EMS on-scene time during  
59 636 advanced life support in out-of-hospital cardiac arrest: a retrospective observational

- 1  
2  
3 637 trial. *European Heart Journal: Acute Cardiovascular Care* 2020;9(4\_suppl):S82-S89.  
4 638 doi: 10.1177/2048872620925681
- 5  
6 639 27. Wyen H, Lefering R, Maegle M, et al. The golden hour of shock - how time is running  
7 640 out: prehospital time intervals in Germany--a multivariate analysis of 15, 103  
8 641 patients from the TraumaRegister DGU(R). *Emergency medicine journal : EMJ*  
9 642 2013;30(12):1048-55. doi: 10.1136/emmermed-2012-201962
- 10  
11 643 28. Ashburn NP, Hendley NW, Angi RM, et al. Prehospital Trauma Scene and Transport  
12 644 Times for Pediatric and Adult Patients. *West J Emerg Med* 2020;21(2):455-62. doi:  
13 645 10.5811/westjem.2019.11.44597
- 14  
15 646 29. Fok PT, Teubner D, Purdell-Lewis J, et al. Predictors of prehospital on-scene time in an  
16 647 Australian emergency retrieval service. *Prehospital and disaster medicine*  
17 648 2019;34(3):317-21. doi: 10.1017/S1049023X19004394
- 18  
19 649 30. Hjalmarsson A, Holmberg M, Asp M, et al. Characteristic patterns of emergency  
20 650 ambulance assignments for older adults compared with adults requiring emergency  
21 651 care at home in Sweden: a total population study. *BMC Emergency Medicine*  
22 652 2020;20(1):94. doi: 10.1186/s12873-020-00387-y
- 23  
24 653 31. Sullivan AL, Beshansky JR, Ruthazer R, et al. Factors associated with longer time to  
25 654 treatment for patients with suspected acute coronary syndromes: a cohort study.  
26 655 *Circulation Cardiovascular quality and outcomes* 2014;7(1):86-94. doi:  
27 656 10.1161/CIRCOUTCOMES.113.000396
- 28  
29 657 32. Nagata I, Abe T, Nakata Y, et al. Factors related to prolonged on-scene time during  
30 658 ambulance transportation for critical emergency patients in a big city in Japan: a  
31 659 population-based observational study. *BMJ Open* 2016;6(1):e009599. doi:  
32 660 10.1136/bmjopen-2015-009599
- 33  
34 661 33. Cone DC. Emergency department overcrowding and ambulance transport delays for  
35 662 patients with chest pain. *Annals of Emergency Medicine* 2004;43(3):425-26. doi:  
36 663 10.1016/j.annemergmed.2003.12.016
- 37  
38 664 34. Lewis JF, Zeger SL, Li X, et al. Gender differences in the quality of EMS care nationwide  
39 665 for chest pain and out-of-hospital cardiac arrest. *Women's Health Issues*  
40 666 2019;29(2):116-24. doi: 10.1016/j.whi.2018.10.007
- 41  
42 667 35. Rothrock SG, Brandt P, Godfrey B, et al. I S T H E R E G E N D E R B I A S I N T H E P R E H O S P I T A L  
43 668 M A N A G E M E N T O F P A T I E N T S W I T H A C U T E C H E S T P A I N ? *Prehospital Emergency*  
44 669 *Care* 2001;5(4):331-34. doi: 10.1080/10903120190939454
- 45  
46 670 36. Morrison LJ, Angelini MP, Vermeulen MJ, et al. Measuring the EMS Patient Access Time  
47 671 Interval and the Impact of Responding to High-rise Buildings. *PREHOSPITAL*  
48 672 *EMERGENCY CARE* 2005;9(1):14-18. doi: 10.1080/10903120590891679
- 49  
50 673 37. Drennan IR, Strum RP, Byers A, et al. Out-of-hospital cardiac arrest in high-rise buildings:  
51 674 delays to patient care and effect on survival. *CMAJ : Canadian Medical Association*  
52 675 *Journal* 2016;188(6):413-19. doi: 10.1503/cmaj.150544
- 53  
54 676 38. Abdul Salam A, Elsegaey I, Khraif R, et al. Population distribution and household  
55 677 conditions in Saudi Arabia: reflections from the 2010 Census. *Springerplus*  
56 678 2014;3:530-30. doi: 10.1186/2193-1801-3-530
- 57  
58 679 39. Al-Amoudi S. The Right of Saudi Women to Sign for their Health Care in Saudi Arabia,  
59 680 Fact and Fiction. *LIFE SCIENCE JOURNAL-ACTA ZHENGZHOU UNIVERSITY OVERSEAS*  
60 681 *EDITION* 2012;9(4):3143-46.
- 62  
63 682 40. Al-Amoudi SM. Health empowerment and health rights in Saudi Arabia. *Saudi Med J*  
64 683 2017;38(8):785-87. doi: 10.15537/smj.2017.8.19832

- 1  
2  
3 684 41. Aldosari H. The effect of gender norms on women's health in Saudi Arabia: Arab Gulf  
4 685 States Institute in Washington Washington, DC 2017:7.  
5 686 42. Almubark R, Basyouni M, Alghanem A, et al. Health literacy in Saudi Arabia: Implications  
6 687 for public health and healthcare access. *Pharmacology Research & Perspectives*  
7 688 2019;7(4) doi: 10.1002/prp2.514  
8 689 43. Moafa HN, van Kuijk SMJ, Moukhyer ME, et al. Non-Conveyance Due to Patient-Initiated  
9 690 Refusal in Emergency Medical Services: A Retrospective Population-Based Registry  
10 691 Analysis Study in Riyadh Province, Saudi Arabia. *International journal of*  
11 692 *environmental research and public health* 2021;18(17) doi: 10.3390/ijerph18179252  
12 693 44. Hartley PR. Paramedic practice and the cultural and religious needs of pre-hospital  
13 694 patients in Victoria. Victoria University, 2012.  
14 695

15 696 Figure 1 Flow chart of included and excluded patients.

16 697 BLS, Basic Life Support; MICU, Mobile Intensive Care Unit; RRNTV, Rapid Response Non-Transporting Vehicle.  
17 698  
18 699





## STROBE Statement—checklist of items that should be included in reports of observational studies

|                              | Item No. | Recommendation                                                                                                                                                                             | Page No. | Relevant text from manuscript |
|------------------------------|----------|--------------------------------------------------------------------------------------------------------------------------------------------------------------------------------------------|----------|-------------------------------|
| <b>Title and abstract</b>    | 1        | (a) Indicate the study's design with a commonly used term in the title or the abstract                                                                                                     | 2        | Line 45                       |
|                              |          | (b) Provide in the abstract an informative and balanced summary of what was done and what was found                                                                                        | 2        | Lines 45 – 62                 |
| <b>Introduction</b>          |          |                                                                                                                                                                                            |          |                               |
| Background/rationale         | 2        | Explain the scientific background and rationale for the investigation being reported                                                                                                       | 4        | Lines 121 – 151               |
| Objectives                   | 3        | State specific objectives, including any prespecified hypotheses                                                                                                                           | 4 – 5    | Lines 152 – 155               |
| <b>Methods</b>               |          |                                                                                                                                                                                            |          |                               |
| Study design                 | 4        | Present key elements of study design early in the paper                                                                                                                                    | 5        | Lines 159 – 163               |
| Setting                      | 5        | Describe the setting, locations, and relevant dates, including periods of recruitment, exposure, follow-up, and data collection                                                            | 5 – 6    | Lines 166 – 202               |
| Participants                 | 6        | (a) <i>Cohort study</i> —Give the eligibility criteria, and the sources and methods of selection of participants. Describe methods of follow-up                                            | 6 – 7    | Lines 216 – 227               |
|                              |          | <i>Case-control study</i> —Give the eligibility criteria, and the sources and methods of case ascertainment and control selection. Give the rationale for the choice of cases and controls |          |                               |
|                              |          | <i>Cross-sectional study</i> —Give the eligibility criteria, and the sources and methods of selection of participants                                                                      |          |                               |
|                              |          | (b) <i>Cohort study</i> —For matched studies, give matching criteria and number of exposed and unexposed                                                                                   |          |                               |
|                              |          | <i>Case-control study</i> —For matched studies, give matching criteria and the number of controls per case                                                                                 |          |                               |
| Variables                    | 7        | Clearly define all outcomes, exposures, predictors, potential confounders, and effect modifiers. Give diagnostic criteria, if applicable                                                   | 7 – 9    | Lines 230 – 290               |
| Data sources/<br>measurement | 8*       | For each variable of interest, give sources of data and details of methods of assessment (measurement). Describe comparability of assessment methods if there is more than one group       | 7 – 9    | Lines 230 – 306               |
| Bias                         | 9        | Describe any efforts to address potential sources of bias                                                                                                                                  | 7        | Lines 223 – 227               |
| Study size                   | 10       | Explain how the study size was arrived at                                                                                                                                                  | 6 – 7    | Lines 216 – 227               |

Continued on next page

|                        |     |                                                                                                                                                                                                              |         |                 |
|------------------------|-----|--------------------------------------------------------------------------------------------------------------------------------------------------------------------------------------------------------------|---------|-----------------|
| Quantitative variables | 11  | Explain how quantitative variables were handled in the analyses. If applicable, describe which groupings were chosen and why                                                                                 | 7 – 9   | Lines 230 – 290 |
| Statistical methods    | 12  | (a) Describe all statistical methods, including those used to control for confounding                                                                                                                        | 9       | Lines 293 – 306 |
|                        |     | (b) Describe any methods used to examine subgroups and interactions                                                                                                                                          | 9       | Lines 293 – 306 |
|                        |     | (c) Explain how missing data were addressed                                                                                                                                                                  | 7       | Lines 222 – 225 |
|                        |     | (d) <i>Cohort study</i> —If applicable, explain how loss to follow-up was addressed                                                                                                                          | NA      | NA              |
|                        |     | <i>Case-control study</i> —If applicable, explain how matching of cases and controls was addressed                                                                                                           | NA      | NA              |
|                        |     | <i>Cross-sectional study</i> —If applicable, describe analytical methods taking account of sampling strategy                                                                                                 | NA      | NA              |
|                        |     | (e) Describe any sensitivity analyses                                                                                                                                                                        | NA      | NA              |
| <b>Results</b>         |     |                                                                                                                                                                                                              |         |                 |
| Participants           | 13* | (a) Report numbers of individuals at each stage of study—eg numbers potentially eligible, examined for eligibility, confirmed eligible, included in the study, completing follow-up, and analysed            | 9 – 10  | 310 – 328       |
|                        |     | (b) Give reasons for non-participation at each stage                                                                                                                                                         | 9 – 10  | 315 – 323       |
|                        |     | (c) Consider use of a flow diagram                                                                                                                                                                           | 9       | 315             |
| Descriptive data       | 14* | (a) Give characteristics of study participants (eg demographic, clinical, social) and information on exposures and potential confounders                                                                     | 10      | 323 – 328       |
|                        |     | (b) Indicate number of participants with missing data for each variable of interest                                                                                                                          | 10 – 11 | 323 – 345       |
|                        |     | (c) <i>Cohort study</i> —Summarise follow-up time (eg, average and total amount)                                                                                                                             | N/A     | N/A             |
| Outcome data           | 15* | <i>Cohort study</i> —Report numbers of outcome events or summary measures over time                                                                                                                          | 14 – 15 | 380 - 386       |
|                        |     | <i>Case-control study</i> —Report numbers in each exposure category, or summary measures of exposure                                                                                                         | N/A     | N/A             |
|                        |     | <i>Cross-sectional study</i> —Report numbers of outcome events or summary measures                                                                                                                           | N/A     | N/A             |
| Main results           | 16  | (a) Give unadjusted estimates and, if applicable, confounder-adjusted estimates and their precision (eg, 95% confidence interval). Make clear which confounders were adjusted for and why they were included | 10 – 15 | 331 – 386       |
|                        |     | (b) Report category boundaries when continuous variables were categorized                                                                                                                                    | 10 – 15 | 332 - 386       |
|                        |     | (c) If relevant, consider translating estimates of relative risk into absolute risk for a meaningful time period                                                                                             | N/A     | N/A             |

Continued on next page

|                          |    |                                                                                                                                                                            |         |           |
|--------------------------|----|----------------------------------------------------------------------------------------------------------------------------------------------------------------------------|---------|-----------|
| Other analyses           | 17 | Report other analyses done—eg analyses of subgroups and interactions, and sensitivity analyses                                                                             | 12 – 15 | 375 – 386 |
| <b>Discussion</b>        |    |                                                                                                                                                                            |         |           |
| Key results              | 18 | Summarise key results with reference to study objectives                                                                                                                   | 15      | 388 – 391 |
| Limitations              | 19 | Discuss limitations of the study, taking into account sources of potential bias or imprecision. Discuss both direction and magnitude of any potential bias                 | 19 – 20 | 499 – 526 |
| Interpretation           | 20 | Give a cautious overall interpretation of results considering objectives, limitations, multiplicity of analyses, results from similar studies, and other relevant evidence | 15 – 19 | 392 - 496 |
| Generalisability         | 21 | Discuss the generalisability (external validity) of the study results                                                                                                      | 20      | 527 – 530 |
| <b>Other information</b> |    |                                                                                                                                                                            |         |           |
| Funding                  | 22 | Give the source of funding and the role of the funders for the present study and, if applicable, for the original study on which the present article is based              | 21      | 552       |

\*Give information separately for cases and controls in case-control studies and, if applicable, for exposed and unexposed groups in cohort and cross-sectional studies.

**Note:** An Explanation and Elaboration article discusses each checklist item and gives methodological background and published examples of transparent reporting. The STROBE checklist is best used in conjunction with this article (freely available on the Web sites of PLoS Medicine at <http://www.plosmedicine.org/>, Annals of Internal Medicine at <http://www.annals.org/>, and Epidemiology at <http://www.epidem.com/>). Information on the STROBE Initiative is available at [www.strobe-statement.org](http://www.strobe-statement.org).
